# Supplementary material for: Human iPSC modeling reveals mutation-specific responses to gene therapy in Best disease
Source: bioRxiv or medRxiv preprint supplement (doi:10.1101/796581), 2020-01-31

2M512-1-4044 Sample 1 Sample Name

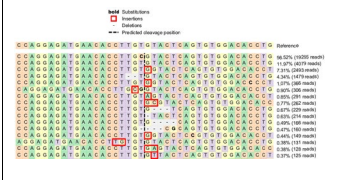

Table with columns: Accession, % identity, % coverage, % of reads, % of reads, % of reads. Lists various reference sequences and their alignment statistics.

Summary table for sample 2M512-1-4044 with columns: Accession, % identity, % coverage, % of reads, % of reads, % of reads.

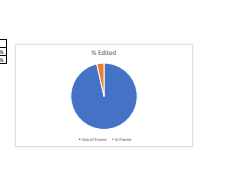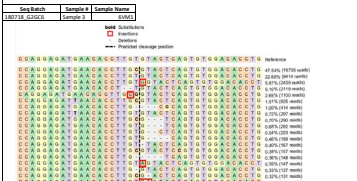

Table with columns: Accession, % identity, % coverage, % of reads, % of reads, % of reads.

Summary table for sample 2M512-1-4044 (Sample 2).

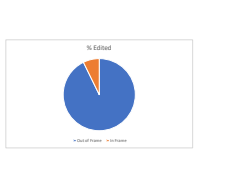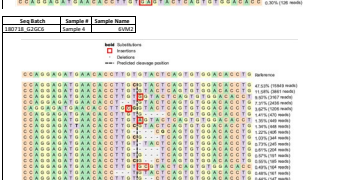

Table with columns: Accession, % identity, % coverage, % of reads, % of reads, % of reads.

Summary table for sample 2M512-1-4044 (Sample 3).

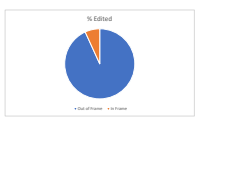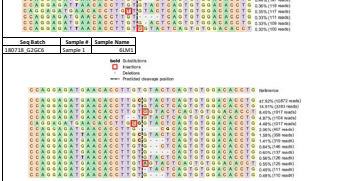

Table with columns: Accession, % identity, % coverage, % of reads, % of reads, % of reads.

Summary table for sample 2M512-1-4044 (Sample 4).

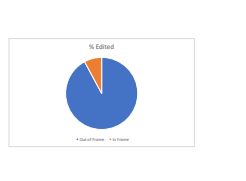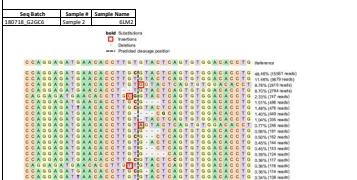

Table with columns: Accession, % identity, % coverage, % of reads, % of reads, % of reads.

Summary table for sample 2M512-1-4044 (Sample 5).

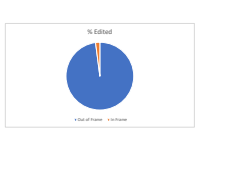

2M512-1-4044 Sample 1 Sample Name

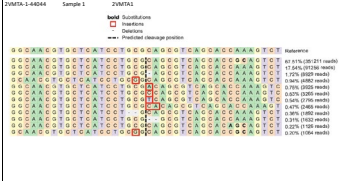

Table with columns: Accession, % identity, % coverage, % of reads, % of reads, % of reads.

Summary table for sample 2M512-1-4044 (Sample 1).

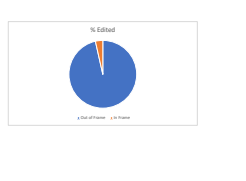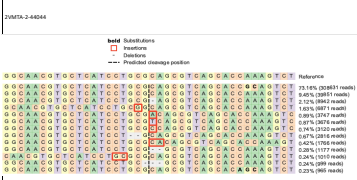

Table with columns: Accession, % identity, % coverage, % of reads, % of reads, % of reads.

Summary table for sample 2M512-1-4044 (Sample 2).

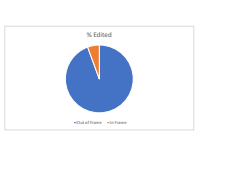

2M512-1-4044 Sample 1 Sample Name

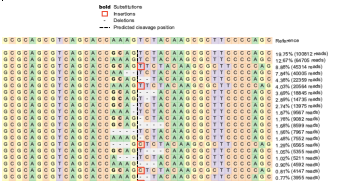

Table with columns: Accession, % identity, % coverage, % of reads, % of reads, % of reads.

Summary table for sample 2M512-1-4044 (Sample 1).

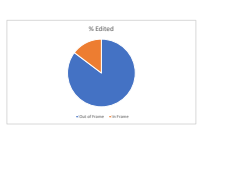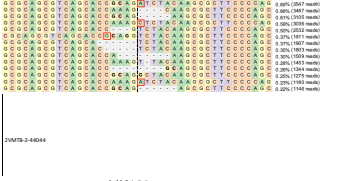

Table with columns: Accession, % identity, % coverage, % of reads, % of reads, % of reads.

Summary table for sample 2M512-1-4044 (Sample 2).

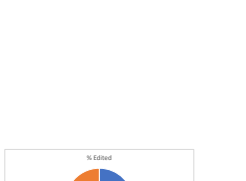

2M512-1-4044 Sample 1 Sample Name

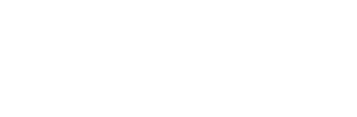

Table with columns: Accession, % identity, % coverage, % of reads, % of reads, % of reads.

Summary table for sample 2M512-1-4044 (Sample 1).

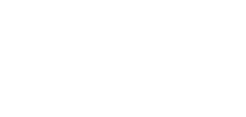



Comparison of experimental indel frequency outcomes in iPSC-RPE+GE to outcomes predicted by inDelphi tool

| gRNA name   | gRNA sequence         | Celltype | 1-bp ins frequency | Frameshift frequency | Frame +0 frequency | Frame +1 frequency | Frame +2 frequency | URL link to analysis                                  |
|-------------|-----------------------|----------|--------------------|----------------------|--------------------|--------------------|--------------------|-------------------------------------------------------|
| R218C sgRNA | GGTGTCACACTGAGTACACA  | mESC     | 8.60384578         | 84.21743046          | 15.78256954        | 61.8101643         | 22.40726616        | /single_mESC_ILy6sOijgBxepTEAlNgQFSbdfuffLygYK_C_50   |
| R218C sgRNA | GGTGTCACACTGAGTACACA  | HEK293   | 21.5628124         | 86.45522474          | 13.54477526        | 67.22506179        | 19.23016296        | /single_HEK293_ILy6sOijgBxepTEAlNgQFSbdfuffLygYK_C_50 |
| R218C sgRNA | GGTGTCACACTGAGTACACA  | U2OS     | 38.47271826        | 89.3752794           | 10.6247206         | 74.29085719        | 15.0844222         | /single_U2OS_ILy6sOijgBxepTEAlNgQFSbdfuffLygYK_C_50   |
| R218C sgRNA | GGTGTCACACTGAGTACACA  | HCT116   | 24.19476211        | 86.90971793          | 13.09028207        | 68.32482061        | 18.58489732        | /single_HCT116_ILy6sOijgBxepTEAlNgQFSbdfuffLygYK_C_50 |
| R218C sgRNA | GGTGTCACACTGAGTACACA  | K562     | 13.66236759        | 85.09095159          | 14.90904841        | 63.92386501        | 21.16708657        | /single_K562_ILy6sOijgBxepTEAlNgQFSbdfuffLygYK_C_50   |
| A146K sgRNA | ACTTTGGTGCTGACGCTGCGC | U2OS*    | 19.01305833        | 82.92588141          | 17.07411859        | 75.67184442        | 7.254036991        | /single_U2OS_K3Gf7Acy5vLHv6vP74dfKR2tgbC9MPbkl_G_50   |
| N296H sgRNA | TCATCATCCTCTCCAAGGGG  | U2OS*    | 19.80291099        | 78.05645198          | 21.94354802        | 48.09345543        | 29.96299654        | /single_U2OS_qIIGKdv4J3D3ioPFhndfNcHTNC5I9IT0Z_C_50   |

\*Note: only predicted outcome in U2OS line data shown for A146K sgRNA and N296H sgRNA as U2OS celltype most closely correlated with % frameshift observed experimentally for the R218C sgRNA in iPSC-RPE. Results for other lines can be viewed by following URL.

inDelphi analysis (all celltypes) R218C sgRNA in iPSC-RPE (this study)

| Predicted (% frameshift) | Experimental (% frameshift) |
|--------------------------|-----------------------------|
| 84.2%                    | 96.5%                       |
| 86.5%                    | 92.8%                       |
| 89.4%                    | 93.2%                       |
| 86.9%                    | 92.1%                       |
| 85.1%                    | 98.0%                       |
| 86.4%                    | 94.5%                       |
| 13.6%                    | 5.50%                       |

avg frameshift  
avg non-frameshift

|           | frameshift | non-frameshift |
|-----------|------------|----------------|
| Predicted | 86.4%      | 13.6%          |

|              | frameshift | non-frameshift |
|--------------|------------|----------------|
| Experimental | 94.5%      | 5.50%          |

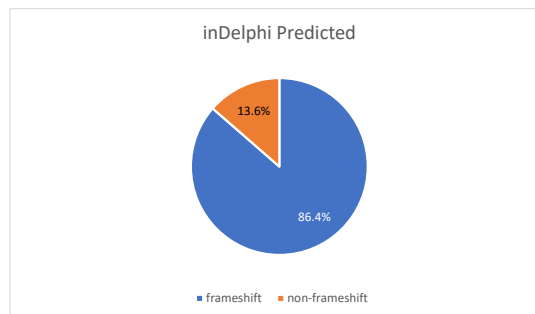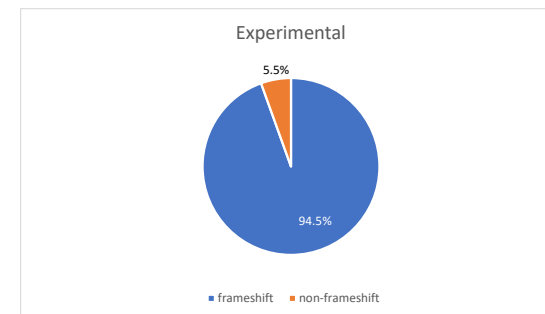

Supplement: Supplementary file [file media-1.pdf]
