# Supplementary material for: Human iPSC modeling reveals mutation-specific responses to gene therapy in Best disease
Source: bioRxiv or medRxiv preprint supplement (doi:10.1101/796581), 2020-01-31
Supplement: Supplementary file [file media-2.pdf]

SI Data File B: Curated gene sets used to assess differences in gene expression between control (*AAVS1*) and mutant *BEST1* allele-targeted sgRNA

| List                         | Name     |
|------------------------------|----------|
| Strunnikova_2010_RPE_MARKERS | RPE65    |
| Strunnikova_2010_RPE_MARKERS | TTR      |
| Strunnikova_2010_RPE_MARKERS | CRX      |
| Strunnikova_2010_RPE_MARKERS | DCT      |
| Strunnikova_2010_RPE_MARKERS | BEST1    |
| Strunnikova_2010_RPE_MARKERS | SIX3     |
| Strunnikova_2010_RPE_MARKERS | CHRNA3   |
| Strunnikova_2010_RPE_MARKERS | TRPM1    |
| Strunnikova_2010_RPE_MARKERS | LHX2     |
| Strunnikova_2010_RPE_MARKERS | SFRP5    |
| Strunnikova_2010_RPE_MARKERS | SILV     |
| Strunnikova_2010_RPE_MARKERS | CSPG5    |
| Strunnikova_2010_RPE_MARKERS | APLP1    |
| Strunnikova_2010_RPE_MARKERS | RBP1     |
| Strunnikova_2010_RPE_MARKERS | TYRP1    |
| Strunnikova_2010_RPE_MARKERS | MYRIP    |
| Strunnikova_2010_RPE_MARKERS | TFPI2    |
| Strunnikova_2010_RPE_MARKERS | MAB21L1  |
| Strunnikova_2010_RPE_MARKERS | PTGDS    |
| Strunnikova_2010_RPE_MARKERS | FRZB     |
| Strunnikova_2010_RPE_MARKERS | SLC6A15  |
| Strunnikova_2010_RPE_MARKERS | SERPINF1 |
| Strunnikova_2010_RPE_MARKERS | DUSP4    |
| Strunnikova_2010_RPE_MARKERS | GEM      |
| Strunnikova_2010_RPE_MARKERS | BMP4     |
| Strunnikova_2010_RPE_MARKERS | SLC6A20  |
| Strunnikova_2010_RPE_MARKERS | CDO1     |
| Strunnikova_2010_RPE_MARKERS | TLL4     |
| Strunnikova_2010_RPE_MARKERS | CDH3     |
| Strunnikova_2010_RPE_MARKERS | ALDH1A3  |
| Strunnikova_2010_RPE_MARKERS | CLCN4    |
| Strunnikova_2010_RPE_MARKERS | ENPP2    |
| Strunnikova_2010_RPE_MARKERS | COL8A2   |
| Strunnikova_2010_RPE_MARKERS | GPR143   |
| Strunnikova_2010_RPE_MARKERS | SOSTDC1  |
| Strunnikova_2010_RPE_MARKERS | PDPN     |
| Strunnikova_2010_RPE_MARKERS | GPNMB    |
| Strunnikova_2010_RPE_MARKERS | SORBS2   |
| Strunnikova_2010_RPE_MARKERS | SULF1    |
| Strunnikova_2010_RPE_MARKERS | EFEMP1   |
| Strunnikova_2010_RPE_MARKERS | FOXD1    |
| Strunnikova_2010_RPE_MARKERS | MPDZ     |
| Strunnikova_2010_RPE_MARKERS | SDC2     |

|                              |          |
|------------------------------|----------|
| Strunnikova_2010_RPE_MARKERS | GJA1     |
| Strunnikova_2010_RPE_MARKERS | LIMCH1   |
| Strunnikova_2010_RPE_MARKERS | FGFR2    |
| Strunnikova_2010_RPE_MARKERS | PLCB4    |
| Strunnikova_2010_RPE_MARKERS | GAS1     |
| Strunnikova_2010_RPE_MARKERS | PKNOX2   |
| Strunnikova_2010_RPE_MARKERS | PITPNA   |
| Strunnikova_2010_RPE_MARKERS | ARMC9    |
| Strunnikova_2010_RPE_MARKERS | BHLHB3   |
| Strunnikova_2010_RPE_MARKERS | MFAP3L   |
| Strunnikova_2010_RPE_MARKERS | ITGAV    |
| Strunnikova_2010_RPE_MARKERS | LOXL1    |
| Strunnikova_2010_RPE_MARKERS | NAV3     |
| Strunnikova_2010_RPE_MARKERS | VEGFA    |
| Strunnikova_2010_RPE_MARKERS | SLC16A1  |
| Strunnikova_2010_RPE_MARKERS | SLC16A1  |
| Strunnikova_2010_RPE_MARKERS | RDH11    |
| Strunnikova_2010_RPE_MARKERS | SGK3     |
| Strunnikova_2010_RPE_MARKERS | RAB38    |
| Strunnikova_2010_RPE_MARKERS | SCAMP1   |
| Strunnikova_2010_RPE_MARKERS | TIMP3    |
| Strunnikova_2010_RPE_MARKERS | LSR      |
| Strunnikova_2010_RPE_MARKERS | SLC16A4  |
| Strunnikova_2010_RPE_MARKERS | MET      |
| Strunnikova_2010_RPE_MARKERS | KLHL21   |
| Strunnikova_2010_RPE_MARKERS | MPHOSPH9 |
| Strunnikova_2010_RPE_MARKERS | GPM6B    |
| Strunnikova_2010_RPE_MARKERS | ARL6IP1  |
| Strunnikova_2010_RPE_MARKERS | BDH2     |
| Strunnikova_2010_RPE_MARKERS | SLC4A2   |
| Strunnikova_2010_RPE_MARKERS | FADS1    |
| Strunnikova_2010_RPE_MARKERS | SMAD6    |
| Strunnikova_2010_RPE_MARKERS | RHOBTB3  |
| Strunnikova_2010_RPE_MARKERS | RRAGD    |
| Strunnikova_2010_RPE_MARKERS | SLC24A1  |
| Strunnikova_2010_RPE_MARKERS | EID1     |
| Strunnikova_2010_RPE_MARKERS | EFHC1    |
| Strunnikova_2010_RPE_MARKERS | NEDD4L   |
| Strunnikova_2010_RPE_MARKERS | GRAMD3   |
| Strunnikova_2010_RPE_MARKERS | ASAH1    |
| Strunnikova_2010_RPE_MARKERS | DZIP1    |
| Strunnikova_2010_RPE_MARKERS | LAPTM4B  |
| Strunnikova_2010_RPE_MARKERS | NDC80    |
| Strunnikova_2010_RPE_MARKERS | COX15    |
| Strunnikova_2010_RPE_MARKERS | PHACTR2  |
| Strunnikova_2010_RPE_MARKERS | SLC39A6  |
| Strunnikova_2010_RPE_MARKERS | WWC2     |

|                              |          |
|------------------------------|----------|
| Strunnikova_2010_RPE_MARKERS | SEMA3C   |
| Strunnikova_2010_RPE_MARKERS | TAX1BP1  |
| Strunnikova_2010_RPE_MARKERS | GULP1    |
| Strunnikova_2010_RPE_MARKERS | ADCY9    |
| Strunnikova_2010_RPE_MARKERS | SIL1     |
| Strunnikova_2010_RPE_MARKERS | RNF13    |
| Strunnikova_2010_RPE_MARKERS | DHPA     |
| Strunnikova_2010_RPE_MARKERS | MED8     |
| Strunnikova_2010_RPE_MARKERS | DNAJB14  |
| Strunnikova_2010_RPE_MARKERS | UBL3     |
| Strunnikova_2010_RPE_MARKERS | KLHL24   |
| Strunnikova_2010_RPE_MARKERS | CRIM1    |
| Strunnikova_2010_RPE_MARKERS | CTBP2    |
| Strunnikova_2010_RPE_MARKERS | DMXL1    |
| Strunnikova_2010_RPE_MARKERS | C20orf19 |
| Strunnikova_2010_RPE_MARKERS | NRIP1    |
| Strunnikova_2010_RPE_MARKERS | USP34    |
| Strunnikova_2010_RPE_MARKERS | PRNP     |
| Strunnikova_2010_RPE_MARKERS | SMC3     |
| Strunnikova_2010_RPE_MARKERS | LIN7C    |
| Strunnikova_2010_RPE_MARKERS | OSTM1    |
| Strunnikova_2010_RPE_MARKERS | PCYOX1   |
| Strunnikova_2010_RPE_MARKERS | PLAG1    |
| Strunnikova_2010_RPE_MARKERS | WWTR1    |
| Strunnikova_2010_RPE_MARKERS | C1orf108 |
| Strunnikova_2010_RPE_MARKERS | PTPRG    |
| Strunnikova_2010_RPE_MARKERS | DIXDC1   |
| Strunnikova_2010_RPE_MARKERS | DAP3     |
| Strunnikova_2010_RPE_MARKERS | STCH     |
| Strunnikova_2010_RPE_MARKERS | FAM18B   |
| Strunnikova_2010_RPE_MARKERS | ANKRD12  |
| Strunnikova_2010_RPE_MARKERS | PLOD2    |
| Strunnikova_2010_RPE_MARKERS | ADAM9    |
| Strunnikova_2010_RPE_MARKERS | MAP9     |
| Strunnikova_2010_RPE_MARKERS | LAMP2    |
| Strunnikova_2010_RPE_MARKERS | STAM2    |
| Strunnikova_2010_RPE_MARKERS | DCUN1D4  |
| Strunnikova_2010_RPE_MARKERS | PDZD8    |
| Strunnikova_2010_RPE_MARKERS | CYP20A1  |
| Strunnikova_2010_RPE_MARKERS | PSME4    |
| Strunnikova_2010_RPE_MARKERS | BAT2D1   |
| Strunnikova_2010_RPE_MARKERS | SPAST    |
| Strunnikova_2010_RPE_MARKERS | CALU     |
| Strunnikova_2010_RPE_MARKERS | MBNL2    |
| Strunnikova_2010_RPE_MARKERS | DEGS1    |
| Strunnikova_2010_RPE_MARKERS | IGF2BP2  |
| Strunnikova_2010_RPE_MARKERS | IFT74    |































































|                                |         |
|--------------------------------|---------|
| GO_CELL_CYCLE                  | ZNF16   |
| GO_CELL_CYCLE                  | ZNF207  |
| GO_CELL_CYCLE                  | ZNF259  |
| GO_CELL_CYCLE                  | ZNF268  |
| GO_CELL_CYCLE                  | ZNF318  |
| GO_CELL_CYCLE                  | ZNF365  |
| GO_CELL_CYCLE                  | ZNF385A |
| GO_CELL_CYCLE                  | ZNF503  |
| GO_CELL_CYCLE                  | ZNF830  |
| GO_CELL_CYCLE                  | ZW10    |
| GO_CELL_CYCLE                  | ZWILCH  |
| GO_CELL_CYCLE                  | ZWINT   |
| GO_APOPTOTIC_SIGNALING_PATHWAY | ABL1    |
| GO_APOPTOTIC_SIGNALING_PATHWAY | ACVR1B  |
| GO_APOPTOTIC_SIGNALING_PATHWAY | ADORA1  |
| GO_APOPTOTIC_SIGNALING_PATHWAY | AEN     |
| GO_APOPTOTIC_SIGNALING_PATHWAY | AIFM1   |
| GO_APOPTOTIC_SIGNALING_PATHWAY | ANXA6   |
| GO_APOPTOTIC_SIGNALING_PATHWAY | APAF1   |
| GO_APOPTOTIC_SIGNALING_PATHWAY | APOPT1  |
| GO_APOPTOTIC_SIGNALING_PATHWAY | APPL1   |
| GO_APOPTOTIC_SIGNALING_PATHWAY | ARL6IP5 |
| GO_APOPTOTIC_SIGNALING_PATHWAY | ATF4    |
| GO_APOPTOTIC_SIGNALING_PATHWAY | ATM     |
| GO_APOPTOTIC_SIGNALING_PATHWAY | ATP2A1  |
| GO_APOPTOTIC_SIGNALING_PATHWAY | BAD     |
| GO_APOPTOTIC_SIGNALING_PATHWAY | BAG3    |
| GO_APOPTOTIC_SIGNALING_PATHWAY | BAG6    |
| GO_APOPTOTIC_SIGNALING_PATHWAY | BAK1    |
| GO_APOPTOTIC_SIGNALING_PATHWAY | BAX     |
| GO_APOPTOTIC_SIGNALING_PATHWAY | BBC3    |
| GO_APOPTOTIC_SIGNALING_PATHWAY | BCL2    |
| GO_APOPTOTIC_SIGNALING_PATHWAY | BCL2A1  |
| GO_APOPTOTIC_SIGNALING_PATHWAY | BCL2L1  |
| GO_APOPTOTIC_SIGNALING_PATHWAY | BCL2L10 |
| GO_APOPTOTIC_SIGNALING_PATHWAY | BCL2L11 |
| GO_APOPTOTIC_SIGNALING_PATHWAY | BCL2L2  |
| GO_APOPTOTIC_SIGNALING_PATHWAY | BCL3    |
| GO_APOPTOTIC_SIGNALING_PATHWAY | BID     |
| GO_APOPTOTIC_SIGNALING_PATHWAY | BLOC1S2 |
| GO_APOPTOTIC_SIGNALING_PATHWAY | BMF     |
| GO_APOPTOTIC_SIGNALING_PATHWAY | BNIP3   |
| GO_APOPTOTIC_SIGNALING_PATHWAY | BNIP3L  |
| GO_APOPTOTIC_SIGNALING_PATHWAY | BOK     |
| GO_APOPTOTIC_SIGNALING_PATHWAY | BRCA1   |
| GO_APOPTOTIC_SIGNALING_PATHWAY | BRCA2   |
| GO_APOPTOTIC_SIGNALING_PATHWAY | BRSK2   |



|                                |          |
|--------------------------------|----------|
| GO_APOPTOTIC_SIGNALING_PATHWAY | BTK      |
| GO_APOPTOTIC_SIGNALING_PATHWAY | C16orf5  |
| GO_APOPTOTIC_SIGNALING_PATHWAY | C22orf29 |
| GO_APOPTOTIC_SIGNALING_PATHWAY | CASP10   |
| GO_APOPTOTIC_SIGNALING_PATHWAY | CASP12   |
| GO_APOPTOTIC_SIGNALING_PATHWAY | CASP2    |
| GO_APOPTOTIC_SIGNALING_PATHWAY | CASP3    |
| GO_APOPTOTIC_SIGNALING_PATHWAY | CASP4    |
| GO_APOPTOTIC_SIGNALING_PATHWAY | CASP8    |
| GO_APOPTOTIC_SIGNALING_PATHWAY | CASP8AP2 |
| GO_APOPTOTIC_SIGNALING_PATHWAY | CASP9    |
| GO_APOPTOTIC_SIGNALING_PATHWAY | CAV1     |
| GO_APOPTOTIC_SIGNALING_PATHWAY | CCK      |
| GO_APOPTOTIC_SIGNALING_PATHWAY | CD14     |
| GO_APOPTOTIC_SIGNALING_PATHWAY | CD24     |
| GO_APOPTOTIC_SIGNALING_PATHWAY | CD27     |
| GO_APOPTOTIC_SIGNALING_PATHWAY | CD28     |
| GO_APOPTOTIC_SIGNALING_PATHWAY | CD38     |
| GO_APOPTOTIC_SIGNALING_PATHWAY | CD3E     |
| GO_APOPTOTIC_SIGNALING_PATHWAY | CD40     |
| GO_APOPTOTIC_SIGNALING_PATHWAY | CD5      |
| GO_APOPTOTIC_SIGNALING_PATHWAY | CD70     |
| GO_APOPTOTIC_SIGNALING_PATHWAY | CDKN1A   |
| GO_APOPTOTIC_SIGNALING_PATHWAY | CEBPB    |
| GO_APOPTOTIC_SIGNALING_PATHWAY | CHAC1    |
| GO_APOPTOTIC_SIGNALING_PATHWAY | CHEK2    |
| GO_APOPTOTIC_SIGNALING_PATHWAY | CIB1     |
| GO_APOPTOTIC_SIGNALING_PATHWAY | CIDEB    |
| GO_APOPTOTIC_SIGNALING_PATHWAY | CLU      |
| GO_APOPTOTIC_SIGNALING_PATHWAY | CRADD    |
| GO_APOPTOTIC_SIGNALING_PATHWAY | CRH      |
| GO_APOPTOTIC_SIGNALING_PATHWAY | CRIP1    |
| GO_APOPTOTIC_SIGNALING_PATHWAY | CUL1     |
| GO_APOPTOTIC_SIGNALING_PATHWAY | CUL2     |
| GO_APOPTOTIC_SIGNALING_PATHWAY | CUL3     |
| GO_APOPTOTIC_SIGNALING_PATHWAY | CUL4A    |
| GO_APOPTOTIC_SIGNALING_PATHWAY | CUL5     |
| GO_APOPTOTIC_SIGNALING_PATHWAY | CYCS     |
| GO_APOPTOTIC_SIGNALING_PATHWAY | CYP1B1   |
| GO_APOPTOTIC_SIGNALING_PATHWAY | DAB2IP   |
| GO_APOPTOTIC_SIGNALING_PATHWAY | DAP      |
| GO_APOPTOTIC_SIGNALING_PATHWAY | DAP3     |
| GO_APOPTOTIC_SIGNALING_PATHWAY | DAPK1    |
| GO_APOPTOTIC_SIGNALING_PATHWAY | DAPK3    |
| GO_APOPTOTIC_SIGNALING_PATHWAY | DAPL1    |
| GO_APOPTOTIC_SIGNALING_PATHWAY | DAXX     |
| GO_APOPTOTIC_SIGNALING_PATHWAY | DCC      |

|                                |         |
|--------------------------------|---------|
| GO_APOPTOTIC_SIGNALING_PATHWAY | DDIT3   |
| GO_APOPTOTIC_SIGNALING_PATHWAY | DDIT4   |
| GO_APOPTOTIC_SIGNALING_PATHWAY | DDX3X   |
| GO_APOPTOTIC_SIGNALING_PATHWAY | DDX47   |
| GO_APOPTOTIC_SIGNALING_PATHWAY | DDX5    |
| GO_APOPTOTIC_SIGNALING_PATHWAY | DEDD    |
| GO_APOPTOTIC_SIGNALING_PATHWAY | DEDD2   |
| GO_APOPTOTIC_SIGNALING_PATHWAY | DIABLO  |
| GO_APOPTOTIC_SIGNALING_PATHWAY | DIDO1   |
| GO_APOPTOTIC_SIGNALING_PATHWAY | DNAJC10 |
| GO_APOPTOTIC_SIGNALING_PATHWAY | DNM1L   |
| GO_APOPTOTIC_SIGNALING_PATHWAY | DPF2    |
| GO_APOPTOTIC_SIGNALING_PATHWAY | DYRK2   |
| GO_APOPTOTIC_SIGNALING_PATHWAY | E2F1    |
| GO_APOPTOTIC_SIGNALING_PATHWAY | E2F2    |
| GO_APOPTOTIC_SIGNALING_PATHWAY | EDA2R   |
| GO_APOPTOTIC_SIGNALING_PATHWAY | EP300   |
| GO_APOPTOTIC_SIGNALING_PATHWAY | EPHA2   |
| GO_APOPTOTIC_SIGNALING_PATHWAY | ERBB3   |
| GO_APOPTOTIC_SIGNALING_PATHWAY | ERCC6   |
| GO_APOPTOTIC_SIGNALING_PATHWAY | ERN1    |
| GO_APOPTOTIC_SIGNALING_PATHWAY | ERO1L   |
| GO_APOPTOTIC_SIGNALING_PATHWAY | EYA2    |
| GO_APOPTOTIC_SIGNALING_PATHWAY | FADD    |
| GO_APOPTOTIC_SIGNALING_PATHWAY | FAS     |
| GO_APOPTOTIC_SIGNALING_PATHWAY | FASLG   |
| GO_APOPTOTIC_SIGNALING_PATHWAY | FASTK   |
| GO_APOPTOTIC_SIGNALING_PATHWAY | FGFR3   |
| GO_APOPTOTIC_SIGNALING_PATHWAY | FHIT    |
| GO_APOPTOTIC_SIGNALING_PATHWAY | FIS1    |
| GO_APOPTOTIC_SIGNALING_PATHWAY | FNIP2   |
| GO_APOPTOTIC_SIGNALING_PATHWAY | FOXO3   |
| GO_APOPTOTIC_SIGNALING_PATHWAY | G0S2    |
| GO_APOPTOTIC_SIGNALING_PATHWAY | GABARAP |
| GO_APOPTOTIC_SIGNALING_PATHWAY | GGCT    |
| GO_APOPTOTIC_SIGNALING_PATHWAY | GPX1    |
| GO_APOPTOTIC_SIGNALING_PATHWAY | GSK3A   |
| GO_APOPTOTIC_SIGNALING_PATHWAY | GSK3B   |
| GO_APOPTOTIC_SIGNALING_PATHWAY | HIC1    |
| GO_APOPTOTIC_SIGNALING_PATHWAY | HINT1   |
| GO_APOPTOTIC_SIGNALING_PATHWAY | HIP1    |
| GO_APOPTOTIC_SIGNALING_PATHWAY | HIPK1   |
| GO_APOPTOTIC_SIGNALING_PATHWAY | HIPK2   |
| GO_APOPTOTIC_SIGNALING_PATHWAY | HMOX1   |
| GO_APOPTOTIC_SIGNALING_PATHWAY | HRAS    |
| GO_APOPTOTIC_SIGNALING_PATHWAY | HTRA2   |
| GO_APOPTOTIC_SIGNALING_PATHWAY | IFI16   |

|                                |          |
|--------------------------------|----------|
| GO_APOPTOTIC_SIGNALING_PATHWAY | IFI27    |
| GO_APOPTOTIC_SIGNALING_PATHWAY | IFI6     |
| GO_APOPTOTIC_SIGNALING_PATHWAY | IFNG     |
| GO_APOPTOTIC_SIGNALING_PATHWAY | IKBKE    |
| GO_APOPTOTIC_SIGNALING_PATHWAY | IL12A    |
| GO_APOPTOTIC_SIGNALING_PATHWAY | IL1A     |
| GO_APOPTOTIC_SIGNALING_PATHWAY | IL1B     |
| GO_APOPTOTIC_SIGNALING_PATHWAY | IL2      |
| GO_APOPTOTIC_SIGNALING_PATHWAY | IL33     |
| GO_APOPTOTIC_SIGNALING_PATHWAY | IL4      |
| GO_APOPTOTIC_SIGNALING_PATHWAY | IL6R     |
| GO_APOPTOTIC_SIGNALING_PATHWAY | INHBA    |
| GO_APOPTOTIC_SIGNALING_PATHWAY | ITGAV    |
| GO_APOPTOTIC_SIGNALING_PATHWAY | ITPR1    |
| GO_APOPTOTIC_SIGNALING_PATHWAY | JAK2     |
| GO_APOPTOTIC_SIGNALING_PATHWAY | JUN      |
| GO_APOPTOTIC_SIGNALING_PATHWAY | KIAA0141 |
| GO_APOPTOTIC_SIGNALING_PATHWAY | KITLG    |
| GO_APOPTOTIC_SIGNALING_PATHWAY | KRT18    |
| GO_APOPTOTIC_SIGNALING_PATHWAY | KRT8     |
| GO_APOPTOTIC_SIGNALING_PATHWAY | LAMP1    |
| GO_APOPTOTIC_SIGNALING_PATHWAY | LGALS12  |
| GO_APOPTOTIC_SIGNALING_PATHWAY | LY96     |
| GO_APOPTOTIC_SIGNALING_PATHWAY | MAEL     |
| GO_APOPTOTIC_SIGNALING_PATHWAY | MAP3K5   |
| GO_APOPTOTIC_SIGNALING_PATHWAY | MAPK9    |
| GO_APOPTOTIC_SIGNALING_PATHWAY | MAPT     |
| GO_APOPTOTIC_SIGNALING_PATHWAY | MCL1     |
| GO_APOPTOTIC_SIGNALING_PATHWAY | MELK     |
| GO_APOPTOTIC_SIGNALING_PATHWAY | MFF      |
| GO_APOPTOTIC_SIGNALING_PATHWAY | MKNK2    |
| GO_APOPTOTIC_SIGNALING_PATHWAY | MLH1     |
| GO_APOPTOTIC_SIGNALING_PATHWAY | MLLT11   |
| GO_APOPTOTIC_SIGNALING_PATHWAY | MOAP1    |
| GO_APOPTOTIC_SIGNALING_PATHWAY | MSH2     |
| GO_APOPTOTIC_SIGNALING_PATHWAY | MSH6     |
| GO_APOPTOTIC_SIGNALING_PATHWAY | MYBBP1A  |
| GO_APOPTOTIC_SIGNALING_PATHWAY | NBN      |
| GO_APOPTOTIC_SIGNALING_PATHWAY | NDUFA13  |
| GO_APOPTOTIC_SIGNALING_PATHWAY | NF1      |
| GO_APOPTOTIC_SIGNALING_PATHWAY | NFATC4   |
| GO_APOPTOTIC_SIGNALING_PATHWAY | NGF      |
| GO_APOPTOTIC_SIGNALING_PATHWAY | NGFR     |
| GO_APOPTOTIC_SIGNALING_PATHWAY | NGFRAP1  |
| GO_APOPTOTIC_SIGNALING_PATHWAY | NOL3     |
| GO_APOPTOTIC_SIGNALING_PATHWAY | NUPR1    |
| GO_APOPTOTIC_SIGNALING_PATHWAY | P2RX4    |

|                                |          |
|--------------------------------|----------|
| GO_APOPTOTIC_SIGNALING_PATHWAY | P2RX7    |
| GO_APOPTOTIC_SIGNALING_PATHWAY | PARP2    |
| GO_APOPTOTIC_SIGNALING_PATHWAY | PAWR     |
| GO_APOPTOTIC_SIGNALING_PATHWAY | PDCD10   |
| GO_APOPTOTIC_SIGNALING_PATHWAY | PDCD6    |
| GO_APOPTOTIC_SIGNALING_PATHWAY | PDK1     |
| GO_APOPTOTIC_SIGNALING_PATHWAY | PDK2     |
| GO_APOPTOTIC_SIGNALING_PATHWAY | PDPK1    |
| GO_APOPTOTIC_SIGNALING_PATHWAY | PERP     |
| GO_APOPTOTIC_SIGNALING_PATHWAY | PGAP2    |
| GO_APOPTOTIC_SIGNALING_PATHWAY | PHLDA3   |
| GO_APOPTOTIC_SIGNALING_PATHWAY | PIK3R1   |
| GO_APOPTOTIC_SIGNALING_PATHWAY | PMAIP1   |
| GO_APOPTOTIC_SIGNALING_PATHWAY | PML      |
| GO_APOPTOTIC_SIGNALING_PATHWAY | POLB     |
| GO_APOPTOTIC_SIGNALING_PATHWAY | PPARD    |
| GO_APOPTOTIC_SIGNALING_PATHWAY | PPM1F    |
| GO_APOPTOTIC_SIGNALING_PATHWAY | PPP1R13B |
| GO_APOPTOTIC_SIGNALING_PATHWAY | PPP1R15A |
| GO_APOPTOTIC_SIGNALING_PATHWAY | PPP2R5C  |
| GO_APOPTOTIC_SIGNALING_PATHWAY | PRKCA    |
| GO_APOPTOTIC_SIGNALING_PATHWAY | PRKCD    |
| GO_APOPTOTIC_SIGNALING_PATHWAY | PRKDC    |
| GO_APOPTOTIC_SIGNALING_PATHWAY | PRODH    |
| GO_APOPTOTIC_SIGNALING_PATHWAY | PTGIS    |
| GO_APOPTOTIC_SIGNALING_PATHWAY | PTH      |
| GO_APOPTOTIC_SIGNALING_PATHWAY | PYCARD   |
| GO_APOPTOTIC_SIGNALING_PATHWAY | RAF1     |
| GO_APOPTOTIC_SIGNALING_PATHWAY | RELT     |
| GO_APOPTOTIC_SIGNALING_PATHWAY | RHOT1    |
| GO_APOPTOTIC_SIGNALING_PATHWAY | RHOT2    |
| GO_APOPTOTIC_SIGNALING_PATHWAY | RIPK1    |
| GO_APOPTOTIC_SIGNALING_PATHWAY | RIPK3    |
| GO_APOPTOTIC_SIGNALING_PATHWAY | RNF41    |
| GO_APOPTOTIC_SIGNALING_PATHWAY | RPS27L   |
| GO_APOPTOTIC_SIGNALING_PATHWAY | RRP8     |
| GO_APOPTOTIC_SIGNALING_PATHWAY | SART1    |
| GO_APOPTOTIC_SIGNALING_PATHWAY | SCN2A    |
| GO_APOPTOTIC_SIGNALING_PATHWAY | SELK     |
| GO_APOPTOTIC_SIGNALING_PATHWAY | SENP1    |
| GO_APOPTOTIC_SIGNALING_PATHWAY | SFN      |
| GO_APOPTOTIC_SIGNALING_PATHWAY | SGPL1    |
| GO_APOPTOTIC_SIGNALING_PATHWAY | SGPP1    |
| GO_APOPTOTIC_SIGNALING_PATHWAY | SHH      |
| GO_APOPTOTIC_SIGNALING_PATHWAY | SHISA5   |
| GO_APOPTOTIC_SIGNALING_PATHWAY | SIRT1    |
| GO_APOPTOTIC_SIGNALING_PATHWAY | SIVA1    |

|                                |           |
|--------------------------------|-----------|
| GO_APOPTOTIC_SIGNALING_PATHWAY | SMAD3     |
| GO_APOPTOTIC_SIGNALING_PATHWAY | SNW1      |
| GO_APOPTOTIC_SIGNALING_PATHWAY | SOD2      |
| GO_APOPTOTIC_SIGNALING_PATHWAY | SORT1     |
| GO_APOPTOTIC_SIGNALING_PATHWAY | SPN       |
| GO_APOPTOTIC_SIGNALING_PATHWAY | SRGN      |
| GO_APOPTOTIC_SIGNALING_PATHWAY | SST       |
| GO_APOPTOTIC_SIGNALING_PATHWAY | SSTR3     |
| GO_APOPTOTIC_SIGNALING_PATHWAY | ST20      |
| GO_APOPTOTIC_SIGNALING_PATHWAY | STK11     |
| GO_APOPTOTIC_SIGNALING_PATHWAY | STK24     |
| GO_APOPTOTIC_SIGNALING_PATHWAY | STK25     |
| GO_APOPTOTIC_SIGNALING_PATHWAY | TFPT      |
| GO_APOPTOTIC_SIGNALING_PATHWAY | TGFB1     |
| GO_APOPTOTIC_SIGNALING_PATHWAY | TGFB2     |
| GO_APOPTOTIC_SIGNALING_PATHWAY | TICAM1    |
| GO_APOPTOTIC_SIGNALING_PATHWAY | TICAM2    |
| GO_APOPTOTIC_SIGNALING_PATHWAY | TIMM50    |
| GO_APOPTOTIC_SIGNALING_PATHWAY | TLR3      |
| GO_APOPTOTIC_SIGNALING_PATHWAY | TLR4      |
| GO_APOPTOTIC_SIGNALING_PATHWAY | TM2D1     |
| GO_APOPTOTIC_SIGNALING_PATHWAY | TMBIM6    |
| GO_APOPTOTIC_SIGNALING_PATHWAY | TMEM109   |
| GO_APOPTOTIC_SIGNALING_PATHWAY | TNF       |
| GO_APOPTOTIC_SIGNALING_PATHWAY | TNFRSF10A |
| GO_APOPTOTIC_SIGNALING_PATHWAY | TNFRSF10B |
| GO_APOPTOTIC_SIGNALING_PATHWAY | TNFRSF10C |
| GO_APOPTOTIC_SIGNALING_PATHWAY | TNFRSF10D |
| GO_APOPTOTIC_SIGNALING_PATHWAY | TNFRSF11A |
| GO_APOPTOTIC_SIGNALING_PATHWAY | TNFRSF11B |
| GO_APOPTOTIC_SIGNALING_PATHWAY | TNFRSF12A |
| GO_APOPTOTIC_SIGNALING_PATHWAY | TNFRSF14  |
| GO_APOPTOTIC_SIGNALING_PATHWAY | TNFRSF18  |
| GO_APOPTOTIC_SIGNALING_PATHWAY | TNFRSF1A  |
| GO_APOPTOTIC_SIGNALING_PATHWAY | TNFRSF1B  |
| GO_APOPTOTIC_SIGNALING_PATHWAY | TNFRSF21  |
| GO_APOPTOTIC_SIGNALING_PATHWAY | TNFRSF25  |
| GO_APOPTOTIC_SIGNALING_PATHWAY | TNFRSF4   |
| GO_APOPTOTIC_SIGNALING_PATHWAY | TNFRSF6B  |
| GO_APOPTOTIC_SIGNALING_PATHWAY | TNFRSF8   |
| GO_APOPTOTIC_SIGNALING_PATHWAY | TNFRSF9   |
| GO_APOPTOTIC_SIGNALING_PATHWAY | TNFSF10   |
| GO_APOPTOTIC_SIGNALING_PATHWAY | TNFSF12   |
| GO_APOPTOTIC_SIGNALING_PATHWAY | TOPORS    |
| GO_APOPTOTIC_SIGNALING_PATHWAY | TP53      |
| GO_APOPTOTIC_SIGNALING_PATHWAY | TP53BP2   |
| GO_APOPTOTIC_SIGNALING_PATHWAY | TP63      |

|                                             |         |
|---------------------------------------------|---------|
| GO_APOPTOTIC_SIGNALING_PATHWAY              | TP73    |
| GO_APOPTOTIC_SIGNALING_PATHWAY              | TRADD   |
| GO_APOPTOTIC_SIGNALING_PATHWAY              | TRAF2   |
| GO_APOPTOTIC_SIGNALING_PATHWAY              | TRIB3   |
| GO_APOPTOTIC_SIGNALING_PATHWAY              | UACA    |
| GO_APOPTOTIC_SIGNALING_PATHWAY              | UBE2K   |
| GO_APOPTOTIC_SIGNALING_PATHWAY              | UBE4B   |
| GO_APOPTOTIC_SIGNALING_PATHWAY              | USP28   |
| GO_APOPTOTIC_SIGNALING_PATHWAY              | WWOX    |
| GO_APOPTOTIC_SIGNALING_PATHWAY              | XBP1    |
| GO_APOPTOTIC_SIGNALING_PATHWAY              | XPA     |
| GO_APOPTOTIC_SIGNALING_PATHWAY              | ZMAT1   |
| GO_APOPTOTIC_SIGNALING_PATHWAY              | ZMAT3   |
| GO_APOPTOTIC_SIGNALING_PATHWAY              | ZMAT4   |
| GO_APOPTOTIC_SIGNALING_PATHWAY              | ZNF346  |
| GO_APOPTOTIC_SIGNALING_PATHWAY              | ZNF385B |
| GO_APOPTOTIC_SIGNALING_PATHWAY              | ZNF385C |
| GO_APOPTOTIC_SIGNALING_PATHWAY              | ZNF385D |
| GO_APOPTOTIC_SIGNALING_PATHWAY              | ZNF622  |
| GO_CELLULAR_RESPONSE_TO_DNA_DAMAGE_STIMULUS | AATF    |
| GO_CELLULAR_RESPONSE_TO_DNA_DAMAGE_STIMULUS | ABL1    |
| GO_CELLULAR_RESPONSE_TO_DNA_DAMAGE_STIMULUS | ACD     |
| GO_CELLULAR_RESPONSE_TO_DNA_DAMAGE_STIMULUS | ACTL6A  |
| GO_CELLULAR_RESPONSE_TO_DNA_DAMAGE_STIMULUS | ACTR5   |
| GO_CELLULAR_RESPONSE_TO_DNA_DAMAGE_STIMULUS | ACTR8   |
| GO_CELLULAR_RESPONSE_TO_DNA_DAMAGE_STIMULUS | AEN     |
| GO_CELLULAR_RESPONSE_TO_DNA_DAMAGE_STIMULUS | AKT1    |
| GO_CELLULAR_RESPONSE_TO_DNA_DAMAGE_STIMULUS | ALKBH1  |
| GO_CELLULAR_RESPONSE_TO_DNA_DAMAGE_STIMULUS | ALKBH2  |
| GO_CELLULAR_RESPONSE_TO_DNA_DAMAGE_STIMULUS | ALKBH3  |
| GO_CELLULAR_RESPONSE_TO_DNA_DAMAGE_STIMULUS | ALKBH7  |
| GO_CELLULAR_RESPONSE_TO_DNA_DAMAGE_STIMULUS | ALKBH8  |
| GO_CELLULAR_RESPONSE_TO_DNA_DAMAGE_STIMULUS | ANKRD32 |
| GO_CELLULAR_RESPONSE_TO_DNA_DAMAGE_STIMULUS | APBB1   |
| GO_CELLULAR_RESPONSE_TO_DNA_DAMAGE_STIMULUS | APC     |
| GO_CELLULAR_RESPONSE_TO_DNA_DAMAGE_STIMULUS | APEX1   |
| GO_CELLULAR_RESPONSE_TO_DNA_DAMAGE_STIMULUS | APEX2   |
| GO_CELLULAR_RESPONSE_TO_DNA_DAMAGE_STIMULUS | APITD1  |
| GO_CELLULAR_RESPONSE_TO_DNA_DAMAGE_STIMULUS | APLF    |
| GO_CELLULAR_RESPONSE_TO_DNA_DAMAGE_STIMULUS | APTX    |
| GO_CELLULAR_RESPONSE_TO_DNA_DAMAGE_STIMULUS | AQR     |
| GO_CELLULAR_RESPONSE_TO_DNA_DAMAGE_STIMULUS | ARID3A  |
| GO_CELLULAR_RESPONSE_TO_DNA_DAMAGE_STIMULUS | ASCC1   |
| GO_CELLULAR_RESPONSE_TO_DNA_DAMAGE_STIMULUS | ASCC2   |
| GO_CELLULAR_RESPONSE_TO_DNA_DAMAGE_STIMULUS | ASCC3   |
| GO_CELLULAR_RESPONSE_TO_DNA_DAMAGE_STIMULUS | ASF1A   |
| GO_CELLULAR_RESPONSE_TO_DNA_DAMAGE_STIMULUS | ASH2L   |

|                                             |          |
|---------------------------------------------|----------|
| GO_CELLULAR_RESPONSE_TO_DNA_DAMAGE_STIMULUS | ASTE1    |
| GO_CELLULAR_RESPONSE_TO_DNA_DAMAGE_STIMULUS | ATAD5    |
| GO_CELLULAR_RESPONSE_TO_DNA_DAMAGE_STIMULUS | ATF2     |
| GO_CELLULAR_RESPONSE_TO_DNA_DAMAGE_STIMULUS | ATM      |
| GO_CELLULAR_RESPONSE_TO_DNA_DAMAGE_STIMULUS | ATMIN    |
| GO_CELLULAR_RESPONSE_TO_DNA_DAMAGE_STIMULUS | ATR      |
| GO_CELLULAR_RESPONSE_TO_DNA_DAMAGE_STIMULUS | ATRIP    |
| GO_CELLULAR_RESPONSE_TO_DNA_DAMAGE_STIMULUS | ATRX     |
| GO_CELLULAR_RESPONSE_TO_DNA_DAMAGE_STIMULUS | ATXN3    |
| GO_CELLULAR_RESPONSE_TO_DNA_DAMAGE_STIMULUS | AURKA    |
| GO_CELLULAR_RESPONSE_TO_DNA_DAMAGE_STIMULUS | BABAM1   |
| GO_CELLULAR_RESPONSE_TO_DNA_DAMAGE_STIMULUS | BACH1    |
| GO_CELLULAR_RESPONSE_TO_DNA_DAMAGE_STIMULUS | BAD      |
| GO_CELLULAR_RESPONSE_TO_DNA_DAMAGE_STIMULUS | BAG6     |
| GO_CELLULAR_RESPONSE_TO_DNA_DAMAGE_STIMULUS | BAK1     |
| GO_CELLULAR_RESPONSE_TO_DNA_DAMAGE_STIMULUS | BARD1    |
| GO_CELLULAR_RESPONSE_TO_DNA_DAMAGE_STIMULUS | BATF     |
| GO_CELLULAR_RESPONSE_TO_DNA_DAMAGE_STIMULUS | BAX      |
| GO_CELLULAR_RESPONSE_TO_DNA_DAMAGE_STIMULUS | BAZ1B    |
| GO_CELLULAR_RESPONSE_TO_DNA_DAMAGE_STIMULUS | BBC3     |
| GO_CELLULAR_RESPONSE_TO_DNA_DAMAGE_STIMULUS | BCCIP    |
| GO_CELLULAR_RESPONSE_TO_DNA_DAMAGE_STIMULUS | BCL2     |
| GO_CELLULAR_RESPONSE_TO_DNA_DAMAGE_STIMULUS | BCL2A1   |
| GO_CELLULAR_RESPONSE_TO_DNA_DAMAGE_STIMULUS | BCL2L1   |
| GO_CELLULAR_RESPONSE_TO_DNA_DAMAGE_STIMULUS | BCL2L10  |
| GO_CELLULAR_RESPONSE_TO_DNA_DAMAGE_STIMULUS | BCL2L11  |
| GO_CELLULAR_RESPONSE_TO_DNA_DAMAGE_STIMULUS | BCL2L2   |
| GO_CELLULAR_RESPONSE_TO_DNA_DAMAGE_STIMULUS | BCL3     |
| GO_CELLULAR_RESPONSE_TO_DNA_DAMAGE_STIMULUS | BCL6     |
| GO_CELLULAR_RESPONSE_TO_DNA_DAMAGE_STIMULUS | BID      |
| GO_CELLULAR_RESPONSE_TO_DNA_DAMAGE_STIMULUS | BLM      |
| GO_CELLULAR_RESPONSE_TO_DNA_DAMAGE_STIMULUS | BOD1L    |
| GO_CELLULAR_RESPONSE_TO_DNA_DAMAGE_STIMULUS | BOK      |
| GO_CELLULAR_RESPONSE_TO_DNA_DAMAGE_STIMULUS | BRAT1    |
| GO_CELLULAR_RESPONSE_TO_DNA_DAMAGE_STIMULUS | BRCA1    |
| GO_CELLULAR_RESPONSE_TO_DNA_DAMAGE_STIMULUS | BRCA2    |
| GO_CELLULAR_RESPONSE_TO_DNA_DAMAGE_STIMULUS | BRCC3    |
| GO_CELLULAR_RESPONSE_TO_DNA_DAMAGE_STIMULUS | BRD4     |
| GO_CELLULAR_RESPONSE_TO_DNA_DAMAGE_STIMULUS | BRE      |
| GO_CELLULAR_RESPONSE_TO_DNA_DAMAGE_STIMULUS | BRIP1    |
| GO_CELLULAR_RESPONSE_TO_DNA_DAMAGE_STIMULUS | BRSK1    |
| GO_CELLULAR_RESPONSE_TO_DNA_DAMAGE_STIMULUS | BTG2     |
| GO_CELLULAR_RESPONSE_TO_DNA_DAMAGE_STIMULUS | C11orf30 |
| GO_CELLULAR_RESPONSE_TO_DNA_DAMAGE_STIMULUS | C12orf32 |
| GO_CELLULAR_RESPONSE_TO_DNA_DAMAGE_STIMULUS | C12orf48 |
| GO_CELLULAR_RESPONSE_TO_DNA_DAMAGE_STIMULUS | C12orf5  |
| GO_CELLULAR_RESPONSE_TO_DNA_DAMAGE_STIMULUS | C13orf15 |

|                                             |          |
|---------------------------------------------|----------|
| GO_CELLULAR_RESPONSE_TO_DNA_DAMAGE_STIMULUS | C15orf42 |
| GO_CELLULAR_RESPONSE_TO_DNA_DAMAGE_STIMULUS | C16orf5  |
| GO_CELLULAR_RESPONSE_TO_DNA_DAMAGE_STIMULUS | C16orf53 |
| GO_CELLULAR_RESPONSE_TO_DNA_DAMAGE_STIMULUS | C16orf73 |
| GO_CELLULAR_RESPONSE_TO_DNA_DAMAGE_STIMULUS | C17orf70 |
| GO_CELLULAR_RESPONSE_TO_DNA_DAMAGE_STIMULUS | C19orf39 |
| GO_CELLULAR_RESPONSE_TO_DNA_DAMAGE_STIMULUS | C19orf40 |
| GO_CELLULAR_RESPONSE_TO_DNA_DAMAGE_STIMULUS | C1orf124 |
| GO_CELLULAR_RESPONSE_TO_DNA_DAMAGE_STIMULUS | C1orf86  |
| GO_CELLULAR_RESPONSE_TO_DNA_DAMAGE_STIMULUS | C20orf29 |
| GO_CELLULAR_RESPONSE_TO_DNA_DAMAGE_STIMULUS | C20orf72 |
| GO_CELLULAR_RESPONSE_TO_DNA_DAMAGE_STIMULUS | C2orf29  |
| GO_CELLULAR_RESPONSE_TO_DNA_DAMAGE_STIMULUS | C6orf211 |
| GO_CELLULAR_RESPONSE_TO_DNA_DAMAGE_STIMULUS | C8orf80  |
| GO_CELLULAR_RESPONSE_TO_DNA_DAMAGE_STIMULUS | C9orf102 |
| GO_CELLULAR_RESPONSE_TO_DNA_DAMAGE_STIMULUS | C9orf142 |
| GO_CELLULAR_RESPONSE_TO_DNA_DAMAGE_STIMULUS | C9orf80  |
| GO_CELLULAR_RESPONSE_TO_DNA_DAMAGE_STIMULUS | CARM1    |
| GO_CELLULAR_RESPONSE_TO_DNA_DAMAGE_STIMULUS | CASP2    |
| GO_CELLULAR_RESPONSE_TO_DNA_DAMAGE_STIMULUS | CASP3    |
| GO_CELLULAR_RESPONSE_TO_DNA_DAMAGE_STIMULUS | CASP9    |
| GO_CELLULAR_RESPONSE_TO_DNA_DAMAGE_STIMULUS | CCDC111  |
| GO_CELLULAR_RESPONSE_TO_DNA_DAMAGE_STIMULUS | CCDC13   |
| GO_CELLULAR_RESPONSE_TO_DNA_DAMAGE_STIMULUS | CCDC155  |
| GO_CELLULAR_RESPONSE_TO_DNA_DAMAGE_STIMULUS | CCNA2    |
| GO_CELLULAR_RESPONSE_TO_DNA_DAMAGE_STIMULUS | CCNB1    |
| GO_CELLULAR_RESPONSE_TO_DNA_DAMAGE_STIMULUS | CCND1    |
| GO_CELLULAR_RESPONSE_TO_DNA_DAMAGE_STIMULUS | CCNH     |
| GO_CELLULAR_RESPONSE_TO_DNA_DAMAGE_STIMULUS | CCNK     |
| GO_CELLULAR_RESPONSE_TO_DNA_DAMAGE_STIMULUS | CCNO     |
| GO_CELLULAR_RESPONSE_TO_DNA_DAMAGE_STIMULUS | CDC14B   |
| GO_CELLULAR_RESPONSE_TO_DNA_DAMAGE_STIMULUS | CDC25C   |
| GO_CELLULAR_RESPONSE_TO_DNA_DAMAGE_STIMULUS | CDC45    |
| GO_CELLULAR_RESPONSE_TO_DNA_DAMAGE_STIMULUS | CDC5L    |
| GO_CELLULAR_RESPONSE_TO_DNA_DAMAGE_STIMULUS | CDC7     |
| GO_CELLULAR_RESPONSE_TO_DNA_DAMAGE_STIMULUS | CDCA5    |
| GO_CELLULAR_RESPONSE_TO_DNA_DAMAGE_STIMULUS | CDK1     |
| GO_CELLULAR_RESPONSE_TO_DNA_DAMAGE_STIMULUS | CDK2     |
| GO_CELLULAR_RESPONSE_TO_DNA_DAMAGE_STIMULUS | CDK3     |
| GO_CELLULAR_RESPONSE_TO_DNA_DAMAGE_STIMULUS | CDK5RAP3 |
| GO_CELLULAR_RESPONSE_TO_DNA_DAMAGE_STIMULUS | CDK7     |
| GO_CELLULAR_RESPONSE_TO_DNA_DAMAGE_STIMULUS | CDK9     |
| GO_CELLULAR_RESPONSE_TO_DNA_DAMAGE_STIMULUS | CDKN1A   |
| GO_CELLULAR_RESPONSE_TO_DNA_DAMAGE_STIMULUS | CDKN1B   |
| GO_CELLULAR_RESPONSE_TO_DNA_DAMAGE_STIMULUS | CDKN2AIP |
| GO_CELLULAR_RESPONSE_TO_DNA_DAMAGE_STIMULUS | CDKN2D   |
| GO_CELLULAR_RESPONSE_TO_DNA_DAMAGE_STIMULUS | CENPJ    |



|                                             |         |
|---------------------------------------------|---------|
| GO_CELLULAR_RESPONSE_TO_DNA_DAMAGE_STIMULUS | CEP164  |
| GO_CELLULAR_RESPONSE_TO_DNA_DAMAGE_STIMULUS | CEP63   |
| GO_CELLULAR_RESPONSE_TO_DNA_DAMAGE_STIMULUS | CETN2   |
| GO_CELLULAR_RESPONSE_TO_DNA_DAMAGE_STIMULUS | CHAF1A  |
| GO_CELLULAR_RESPONSE_TO_DNA_DAMAGE_STIMULUS | CHAF1B  |
| GO_CELLULAR_RESPONSE_TO_DNA_DAMAGE_STIMULUS | CHCHD6  |
| GO_CELLULAR_RESPONSE_TO_DNA_DAMAGE_STIMULUS | CHD1L   |
| GO_CELLULAR_RESPONSE_TO_DNA_DAMAGE_STIMULUS | CHD2    |
| GO_CELLULAR_RESPONSE_TO_DNA_DAMAGE_STIMULUS | CHEK1   |
| GO_CELLULAR_RESPONSE_TO_DNA_DAMAGE_STIMULUS | CHEK2   |
| GO_CELLULAR_RESPONSE_TO_DNA_DAMAGE_STIMULUS | CHRNA4  |
| GO_CELLULAR_RESPONSE_TO_DNA_DAMAGE_STIMULUS | CIB1    |
| GO_CELLULAR_RESPONSE_TO_DNA_DAMAGE_STIMULUS | CIDEB   |
| GO_CELLULAR_RESPONSE_TO_DNA_DAMAGE_STIMULUS | CINP    |
| GO_CELLULAR_RESPONSE_TO_DNA_DAMAGE_STIMULUS | CLOCK   |
| GO_CELLULAR_RESPONSE_TO_DNA_DAMAGE_STIMULUS | CLSPN   |
| GO_CELLULAR_RESPONSE_TO_DNA_DAMAGE_STIMULUS | CNOT1   |
| GO_CELLULAR_RESPONSE_TO_DNA_DAMAGE_STIMULUS | CNOT10  |
| GO_CELLULAR_RESPONSE_TO_DNA_DAMAGE_STIMULUS | CNOT2   |
| GO_CELLULAR_RESPONSE_TO_DNA_DAMAGE_STIMULUS | CNOT3   |
| GO_CELLULAR_RESPONSE_TO_DNA_DAMAGE_STIMULUS | CNOT4   |
| GO_CELLULAR_RESPONSE_TO_DNA_DAMAGE_STIMULUS | CNOT6   |
| GO_CELLULAR_RESPONSE_TO_DNA_DAMAGE_STIMULUS | CNOT6L  |
| GO_CELLULAR_RESPONSE_TO_DNA_DAMAGE_STIMULUS | CNOT7   |
| GO_CELLULAR_RESPONSE_TO_DNA_DAMAGE_STIMULUS | CNOT8   |
| GO_CELLULAR_RESPONSE_TO_DNA_DAMAGE_STIMULUS | COPS2   |
| GO_CELLULAR_RESPONSE_TO_DNA_DAMAGE_STIMULUS | COPS3   |
| GO_CELLULAR_RESPONSE_TO_DNA_DAMAGE_STIMULUS | COPS4   |
| GO_CELLULAR_RESPONSE_TO_DNA_DAMAGE_STIMULUS | COPS5   |
| GO_CELLULAR_RESPONSE_TO_DNA_DAMAGE_STIMULUS | COPS6   |
| GO_CELLULAR_RESPONSE_TO_DNA_DAMAGE_STIMULUS | COPS7A  |
| GO_CELLULAR_RESPONSE_TO_DNA_DAMAGE_STIMULUS | COPS7B  |
| GO_CELLULAR_RESPONSE_TO_DNA_DAMAGE_STIMULUS | COPS8   |
| GO_CELLULAR_RESPONSE_TO_DNA_DAMAGE_STIMULUS | CRADD   |
| GO_CELLULAR_RESPONSE_TO_DNA_DAMAGE_STIMULUS | CRIP1   |
| GO_CELLULAR_RESPONSE_TO_DNA_DAMAGE_STIMULUS | CRY1    |
| GO_CELLULAR_RESPONSE_TO_DNA_DAMAGE_STIMULUS | CRY2    |
| GO_CELLULAR_RESPONSE_TO_DNA_DAMAGE_STIMULUS | CSNK1D  |
| GO_CELLULAR_RESPONSE_TO_DNA_DAMAGE_STIMULUS | CSNK1E  |
| GO_CELLULAR_RESPONSE_TO_DNA_DAMAGE_STIMULUS | CTC1    |
| GO_CELLULAR_RESPONSE_TO_DNA_DAMAGE_STIMULUS | CTLA4   |
| GO_CELLULAR_RESPONSE_TO_DNA_DAMAGE_STIMULUS | CUL4A   |
| GO_CELLULAR_RESPONSE_TO_DNA_DAMAGE_STIMULUS | CUL4B   |
| GO_CELLULAR_RESPONSE_TO_DNA_DAMAGE_STIMULUS | DCLRE1A |
| GO_CELLULAR_RESPONSE_TO_DNA_DAMAGE_STIMULUS | DCLRE1B |
| GO_CELLULAR_RESPONSE_TO_DNA_DAMAGE_STIMULUS | DCLRE1C |
| GO_CELLULAR_RESPONSE_TO_DNA_DAMAGE_STIMULUS | DDB1    |

|                                             |         |
|---------------------------------------------|---------|
| GO_CELLULAR_RESPONSE_TO_DNA_DAMAGE_STIMULUS | DDB2    |
| GO_CELLULAR_RESPONSE_TO_DNA_DAMAGE_STIMULUS | DDIT3   |
| GO_CELLULAR_RESPONSE_TO_DNA_DAMAGE_STIMULUS | DDIT4   |
| GO_CELLULAR_RESPONSE_TO_DNA_DAMAGE_STIMULUS | DDX1    |
| GO_CELLULAR_RESPONSE_TO_DNA_DAMAGE_STIMULUS | DDX39A  |
| GO_CELLULAR_RESPONSE_TO_DNA_DAMAGE_STIMULUS | DEM1    |
| GO_CELLULAR_RESPONSE_TO_DNA_DAMAGE_STIMULUS | DGKZ    |
| GO_CELLULAR_RESPONSE_TO_DNA_DAMAGE_STIMULUS | DMAP1   |
| GO_CELLULAR_RESPONSE_TO_DNA_DAMAGE_STIMULUS | DMC1    |
| GO_CELLULAR_RESPONSE_TO_DNA_DAMAGE_STIMULUS | DNA2    |
| GO_CELLULAR_RESPONSE_TO_DNA_DAMAGE_STIMULUS | DNAJA1  |
| GO_CELLULAR_RESPONSE_TO_DNA_DAMAGE_STIMULUS | DTL     |
| GO_CELLULAR_RESPONSE_TO_DNA_DAMAGE_STIMULUS | DTX3L   |
| GO_CELLULAR_RESPONSE_TO_DNA_DAMAGE_STIMULUS | DYRK2   |
| GO_CELLULAR_RESPONSE_TO_DNA_DAMAGE_STIMULUS | E2F1    |
| GO_CELLULAR_RESPONSE_TO_DNA_DAMAGE_STIMULUS | E2F4    |
| GO_CELLULAR_RESPONSE_TO_DNA_DAMAGE_STIMULUS | E2F7    |
| GO_CELLULAR_RESPONSE_TO_DNA_DAMAGE_STIMULUS | EEPD1   |
| GO_CELLULAR_RESPONSE_TO_DNA_DAMAGE_STIMULUS | EGLN3   |
| GO_CELLULAR_RESPONSE_TO_DNA_DAMAGE_STIMULUS | EID3    |
| GO_CELLULAR_RESPONSE_TO_DNA_DAMAGE_STIMULUS | EME1    |
| GO_CELLULAR_RESPONSE_TO_DNA_DAMAGE_STIMULUS | EME2    |
| GO_CELLULAR_RESPONSE_TO_DNA_DAMAGE_STIMULUS | ENDOV   |
| GO_CELLULAR_RESPONSE_TO_DNA_DAMAGE_STIMULUS | EP300   |
| GO_CELLULAR_RESPONSE_TO_DNA_DAMAGE_STIMULUS | EPC2    |
| GO_CELLULAR_RESPONSE_TO_DNA_DAMAGE_STIMULUS | EPHA2   |
| GO_CELLULAR_RESPONSE_TO_DNA_DAMAGE_STIMULUS | ERCC1   |
| GO_CELLULAR_RESPONSE_TO_DNA_DAMAGE_STIMULUS | ERCC2   |
| GO_CELLULAR_RESPONSE_TO_DNA_DAMAGE_STIMULUS | ERCC3   |
| GO_CELLULAR_RESPONSE_TO_DNA_DAMAGE_STIMULUS | ERCC4   |
| GO_CELLULAR_RESPONSE_TO_DNA_DAMAGE_STIMULUS | ERCC5   |
| GO_CELLULAR_RESPONSE_TO_DNA_DAMAGE_STIMULUS | ERCC6   |
| GO_CELLULAR_RESPONSE_TO_DNA_DAMAGE_STIMULUS | ERCC8   |
| GO_CELLULAR_RESPONSE_TO_DNA_DAMAGE_STIMULUS | ESCO2   |
| GO_CELLULAR_RESPONSE_TO_DNA_DAMAGE_STIMULUS | EXD2    |
| GO_CELLULAR_RESPONSE_TO_DNA_DAMAGE_STIMULUS | EXO1    |
| GO_CELLULAR_RESPONSE_TO_DNA_DAMAGE_STIMULUS | EYA1    |
| GO_CELLULAR_RESPONSE_TO_DNA_DAMAGE_STIMULUS | EYA2    |
| GO_CELLULAR_RESPONSE_TO_DNA_DAMAGE_STIMULUS | EYA3    |
| GO_CELLULAR_RESPONSE_TO_DNA_DAMAGE_STIMULUS | EYA4    |
| GO_CELLULAR_RESPONSE_TO_DNA_DAMAGE_STIMULUS | FAM175A |
| GO_CELLULAR_RESPONSE_TO_DNA_DAMAGE_STIMULUS | FAM178A |
| GO_CELLULAR_RESPONSE_TO_DNA_DAMAGE_STIMULUS | FAN1    |
| GO_CELLULAR_RESPONSE_TO_DNA_DAMAGE_STIMULUS | FANCA   |
| GO_CELLULAR_RESPONSE_TO_DNA_DAMAGE_STIMULUS | FANCB   |
| GO_CELLULAR_RESPONSE_TO_DNA_DAMAGE_STIMULUS | FANCC   |
| GO_CELLULAR_RESPONSE_TO_DNA_DAMAGE_STIMULUS | FANCD2  |

|                                             |         |
|---------------------------------------------|---------|
| GO_CELLULAR_RESPONSE_TO_DNA_DAMAGE_STIMULUS | FANCE   |
| GO_CELLULAR_RESPONSE_TO_DNA_DAMAGE_STIMULUS | FANCF   |
| GO_CELLULAR_RESPONSE_TO_DNA_DAMAGE_STIMULUS | FANCG   |
| GO_CELLULAR_RESPONSE_TO_DNA_DAMAGE_STIMULUS | FANCI   |
| GO_CELLULAR_RESPONSE_TO_DNA_DAMAGE_STIMULUS | FANCL   |
| GO_CELLULAR_RESPONSE_TO_DNA_DAMAGE_STIMULUS | FANCM   |
| GO_CELLULAR_RESPONSE_TO_DNA_DAMAGE_STIMULUS | FBXO18  |
| GO_CELLULAR_RESPONSE_TO_DNA_DAMAGE_STIMULUS | FBXO31  |
| GO_CELLULAR_RESPONSE_TO_DNA_DAMAGE_STIMULUS | FBXO45  |
| GO_CELLULAR_RESPONSE_TO_DNA_DAMAGE_STIMULUS | FBXO6   |
| GO_CELLULAR_RESPONSE_TO_DNA_DAMAGE_STIMULUS | FBXW7   |
| GO_CELLULAR_RESPONSE_TO_DNA_DAMAGE_STIMULUS | FEN1    |
| GO_CELLULAR_RESPONSE_TO_DNA_DAMAGE_STIMULUS | FMN2    |
| GO_CELLULAR_RESPONSE_TO_DNA_DAMAGE_STIMULUS | FNIP2   |
| GO_CELLULAR_RESPONSE_TO_DNA_DAMAGE_STIMULUS | FOXM1   |
| GO_CELLULAR_RESPONSE_TO_DNA_DAMAGE_STIMULUS | FOXN3   |
| GO_CELLULAR_RESPONSE_TO_DNA_DAMAGE_STIMULUS | FOXO1   |
| GO_CELLULAR_RESPONSE_TO_DNA_DAMAGE_STIMULUS | FOXO3   |
| GO_CELLULAR_RESPONSE_TO_DNA_DAMAGE_STIMULUS | FOXO4   |
| GO_CELLULAR_RESPONSE_TO_DNA_DAMAGE_STIMULUS | FTO     |
| GO_CELLULAR_RESPONSE_TO_DNA_DAMAGE_STIMULUS | FZR1    |
| GO_CELLULAR_RESPONSE_TO_DNA_DAMAGE_STIMULUS | GADD45A |
| GO_CELLULAR_RESPONSE_TO_DNA_DAMAGE_STIMULUS | GEN1    |
| GO_CELLULAR_RESPONSE_TO_DNA_DAMAGE_STIMULUS | GGN     |
| GO_CELLULAR_RESPONSE_TO_DNA_DAMAGE_STIMULUS | GIGYF2  |
| GO_CELLULAR_RESPONSE_TO_DNA_DAMAGE_STIMULUS | GINS2   |
| GO_CELLULAR_RESPONSE_TO_DNA_DAMAGE_STIMULUS | GINS4   |
| GO_CELLULAR_RESPONSE_TO_DNA_DAMAGE_STIMULUS | GML     |
| GO_CELLULAR_RESPONSE_TO_DNA_DAMAGE_STIMULUS | GNL1    |
| GO_CELLULAR_RESPONSE_TO_DNA_DAMAGE_STIMULUS | GPS1    |
| GO_CELLULAR_RESPONSE_TO_DNA_DAMAGE_STIMULUS | GRB2    |
| GO_CELLULAR_RESPONSE_TO_DNA_DAMAGE_STIMULUS | GTF2H1  |
| GO_CELLULAR_RESPONSE_TO_DNA_DAMAGE_STIMULUS | GTF2H2  |
| GO_CELLULAR_RESPONSE_TO_DNA_DAMAGE_STIMULUS | GTF2H2C |
| GO_CELLULAR_RESPONSE_TO_DNA_DAMAGE_STIMULUS | GTF2H2D |
| GO_CELLULAR_RESPONSE_TO_DNA_DAMAGE_STIMULUS | GTF2H3  |
| GO_CELLULAR_RESPONSE_TO_DNA_DAMAGE_STIMULUS | GTF2H4  |
| GO_CELLULAR_RESPONSE_TO_DNA_DAMAGE_STIMULUS | GTF2H5  |
| GO_CELLULAR_RESPONSE_TO_DNA_DAMAGE_STIMULUS | GTSE1   |
| GO_CELLULAR_RESPONSE_TO_DNA_DAMAGE_STIMULUS | H2AFX   |
| GO_CELLULAR_RESPONSE_TO_DNA_DAMAGE_STIMULUS | HELB    |
| GO_CELLULAR_RESPONSE_TO_DNA_DAMAGE_STIMULUS | HELQ    |
| GO_CELLULAR_RESPONSE_TO_DNA_DAMAGE_STIMULUS | HERC2   |
| GO_CELLULAR_RESPONSE_TO_DNA_DAMAGE_STIMULUS | HIC1    |
| GO_CELLULAR_RESPONSE_TO_DNA_DAMAGE_STIMULUS | HINFP   |
| GO_CELLULAR_RESPONSE_TO_DNA_DAMAGE_STIMULUS | HIPK1   |
| GO_CELLULAR_RESPONSE_TO_DNA_DAMAGE_STIMULUS | HIPK2   |

|                                             |          |
|---------------------------------------------|----------|
| GO_CELLULAR_RESPONSE_TO_DNA_DAMAGE_STIMULUS | HIST1H4A |
| GO_CELLULAR_RESPONSE_TO_DNA_DAMAGE_STIMULUS | HIST1H4B |
| GO_CELLULAR_RESPONSE_TO_DNA_DAMAGE_STIMULUS | HIST1H4C |
| GO_CELLULAR_RESPONSE_TO_DNA_DAMAGE_STIMULUS | HIST1H4D |
| GO_CELLULAR_RESPONSE_TO_DNA_DAMAGE_STIMULUS | HIST1H4E |
| GO_CELLULAR_RESPONSE_TO_DNA_DAMAGE_STIMULUS | HIST1H4F |
| GO_CELLULAR_RESPONSE_TO_DNA_DAMAGE_STIMULUS | HIST1H4H |
| GO_CELLULAR_RESPONSE_TO_DNA_DAMAGE_STIMULUS | HIST1H4I |
| GO_CELLULAR_RESPONSE_TO_DNA_DAMAGE_STIMULUS | HIST1H4J |
| GO_CELLULAR_RESPONSE_TO_DNA_DAMAGE_STIMULUS | HIST1H4K |
| GO_CELLULAR_RESPONSE_TO_DNA_DAMAGE_STIMULUS | HIST1H4L |
| GO_CELLULAR_RESPONSE_TO_DNA_DAMAGE_STIMULUS | HIST2H4A |
| GO_CELLULAR_RESPONSE_TO_DNA_DAMAGE_STIMULUS | HIST2H4B |
| GO_CELLULAR_RESPONSE_TO_DNA_DAMAGE_STIMULUS | HIST3H2A |
| GO_CELLULAR_RESPONSE_TO_DNA_DAMAGE_STIMULUS | HIST3H3  |
| GO_CELLULAR_RESPONSE_TO_DNA_DAMAGE_STIMULUS | HIST4H4  |
| GO_CELLULAR_RESPONSE_TO_DNA_DAMAGE_STIMULUS | HLTF     |
| GO_CELLULAR_RESPONSE_TO_DNA_DAMAGE_STIMULUS | HMGA1    |
| GO_CELLULAR_RESPONSE_TO_DNA_DAMAGE_STIMULUS | HMGA2    |
| GO_CELLULAR_RESPONSE_TO_DNA_DAMAGE_STIMULUS | HMGB1    |
| GO_CELLULAR_RESPONSE_TO_DNA_DAMAGE_STIMULUS | HMGB2    |
| GO_CELLULAR_RESPONSE_TO_DNA_DAMAGE_STIMULUS | HMGN1    |
| GO_CELLULAR_RESPONSE_TO_DNA_DAMAGE_STIMULUS | HMOX1    |
| GO_CELLULAR_RESPONSE_TO_DNA_DAMAGE_STIMULUS | HSPA1A   |
| GO_CELLULAR_RESPONSE_TO_DNA_DAMAGE_STIMULUS | HTRA2    |
| GO_CELLULAR_RESPONSE_TO_DNA_DAMAGE_STIMULUS | HUS1     |
| GO_CELLULAR_RESPONSE_TO_DNA_DAMAGE_STIMULUS | HUS1B    |
| GO_CELLULAR_RESPONSE_TO_DNA_DAMAGE_STIMULUS | HUWE1    |
| GO_CELLULAR_RESPONSE_TO_DNA_DAMAGE_STIMULUS | IFI16    |
| GO_CELLULAR_RESPONSE_TO_DNA_DAMAGE_STIMULUS | IGHMBP2  |
| GO_CELLULAR_RESPONSE_TO_DNA_DAMAGE_STIMULUS | IKBKE    |
| GO_CELLULAR_RESPONSE_TO_DNA_DAMAGE_STIMULUS | IKBKG    |
| GO_CELLULAR_RESPONSE_TO_DNA_DAMAGE_STIMULUS | IMMP2L   |
| GO_CELLULAR_RESPONSE_TO_DNA_DAMAGE_STIMULUS | ING4     |
| GO_CELLULAR_RESPONSE_TO_DNA_DAMAGE_STIMULUS | INO80    |
| GO_CELLULAR_RESPONSE_TO_DNA_DAMAGE_STIMULUS | INO80B   |
| GO_CELLULAR_RESPONSE_TO_DNA_DAMAGE_STIMULUS | INO80C   |
| GO_CELLULAR_RESPONSE_TO_DNA_DAMAGE_STIMULUS | INO80D   |
| GO_CELLULAR_RESPONSE_TO_DNA_DAMAGE_STIMULUS | INO80E   |
| GO_CELLULAR_RESPONSE_TO_DNA_DAMAGE_STIMULUS | INTS3    |
| GO_CELLULAR_RESPONSE_TO_DNA_DAMAGE_STIMULUS | INTS7    |
| GO_CELLULAR_RESPONSE_TO_DNA_DAMAGE_STIMULUS | IRF3     |
| GO_CELLULAR_RESPONSE_TO_DNA_DAMAGE_STIMULUS | IRF7     |
| GO_CELLULAR_RESPONSE_TO_DNA_DAMAGE_STIMULUS | ISG15    |
| GO_CELLULAR_RESPONSE_TO_DNA_DAMAGE_STIMULUS | ISY1     |
| GO_CELLULAR_RESPONSE_TO_DNA_DAMAGE_STIMULUS | JMY      |
| GO_CELLULAR_RESPONSE_TO_DNA_DAMAGE_STIMULUS | KAT5     |

|                                             |              |
|---------------------------------------------|--------------|
| GO_CELLULAR_RESPONSE_TO_DNA_DAMAGE_STIMULUS | KDM2A        |
| GO_CELLULAR_RESPONSE_TO_DNA_DAMAGE_STIMULUS | KDM4D        |
| GO_CELLULAR_RESPONSE_TO_DNA_DAMAGE_STIMULUS | KIAA0101     |
| GO_CELLULAR_RESPONSE_TO_DNA_DAMAGE_STIMULUS | KIAA0146     |
| GO_CELLULAR_RESPONSE_TO_DNA_DAMAGE_STIMULUS | KIAA0247     |
| GO_CELLULAR_RESPONSE_TO_DNA_DAMAGE_STIMULUS | KIAA0415     |
| GO_CELLULAR_RESPONSE_TO_DNA_DAMAGE_STIMULUS | KIAA0430     |
| GO_CELLULAR_RESPONSE_TO_DNA_DAMAGE_STIMULUS | KIAA1530     |
| GO_CELLULAR_RESPONSE_TO_DNA_DAMAGE_STIMULUS | KIAA1967     |
| GO_CELLULAR_RESPONSE_TO_DNA_DAMAGE_STIMULUS | KIF22        |
| GO_CELLULAR_RESPONSE_TO_DNA_DAMAGE_STIMULUS | KIN          |
| GO_CELLULAR_RESPONSE_TO_DNA_DAMAGE_STIMULUS | LIG1         |
| GO_CELLULAR_RESPONSE_TO_DNA_DAMAGE_STIMULUS | LIG3         |
| GO_CELLULAR_RESPONSE_TO_DNA_DAMAGE_STIMULUS | LIG4         |
| GO_CELLULAR_RESPONSE_TO_DNA_DAMAGE_STIMULUS | LOC100133315 |
| GO_CELLULAR_RESPONSE_TO_DNA_DAMAGE_STIMULUS | LOC389493    |
| GO_CELLULAR_RESPONSE_TO_DNA_DAMAGE_STIMULUS | LYN          |
| GO_CELLULAR_RESPONSE_TO_DNA_DAMAGE_STIMULUS | MACROD1      |
| GO_CELLULAR_RESPONSE_TO_DNA_DAMAGE_STIMULUS | MACROD2      |
| GO_CELLULAR_RESPONSE_TO_DNA_DAMAGE_STIMULUS | MAD2L2       |
| GO_CELLULAR_RESPONSE_TO_DNA_DAMAGE_STIMULUS | MAEL         |
| GO_CELLULAR_RESPONSE_TO_DNA_DAMAGE_STIMULUS | MAP2K6       |
| GO_CELLULAR_RESPONSE_TO_DNA_DAMAGE_STIMULUS | MAPK1        |
| GO_CELLULAR_RESPONSE_TO_DNA_DAMAGE_STIMULUS | MAPK12       |
| GO_CELLULAR_RESPONSE_TO_DNA_DAMAGE_STIMULUS | MAPK14       |
| GO_CELLULAR_RESPONSE_TO_DNA_DAMAGE_STIMULUS | MAPK3        |
| GO_CELLULAR_RESPONSE_TO_DNA_DAMAGE_STIMULUS | MAPKAPK2     |
| GO_CELLULAR_RESPONSE_TO_DNA_DAMAGE_STIMULUS | MASTL        |
| GO_CELLULAR_RESPONSE_TO_DNA_DAMAGE_STIMULUS | MBD4         |
| GO_CELLULAR_RESPONSE_TO_DNA_DAMAGE_STIMULUS | MC1R         |
| GO_CELLULAR_RESPONSE_TO_DNA_DAMAGE_STIMULUS | MCL1         |
| GO_CELLULAR_RESPONSE_TO_DNA_DAMAGE_STIMULUS | MCM10        |
| GO_CELLULAR_RESPONSE_TO_DNA_DAMAGE_STIMULUS | MCM7         |
| GO_CELLULAR_RESPONSE_TO_DNA_DAMAGE_STIMULUS | MCM8         |
| GO_CELLULAR_RESPONSE_TO_DNA_DAMAGE_STIMULUS | MCM9         |
| GO_CELLULAR_RESPONSE_TO_DNA_DAMAGE_STIMULUS | MCRS1        |
| GO_CELLULAR_RESPONSE_TO_DNA_DAMAGE_STIMULUS | MCTS1        |
| GO_CELLULAR_RESPONSE_TO_DNA_DAMAGE_STIMULUS | MDC1         |
| GO_CELLULAR_RESPONSE_TO_DNA_DAMAGE_STIMULUS | MDM2         |
| GO_CELLULAR_RESPONSE_TO_DNA_DAMAGE_STIMULUS | MDM4         |
| GO_CELLULAR_RESPONSE_TO_DNA_DAMAGE_STIMULUS | MEN1         |
| GO_CELLULAR_RESPONSE_TO_DNA_DAMAGE_STIMULUS | MGMT         |
| GO_CELLULAR_RESPONSE_TO_DNA_DAMAGE_STIMULUS | MICA         |
| GO_CELLULAR_RESPONSE_TO_DNA_DAMAGE_STIMULUS | MIF          |
| GO_CELLULAR_RESPONSE_TO_DNA_DAMAGE_STIMULUS | MLH1         |
| GO_CELLULAR_RESPONSE_TO_DNA_DAMAGE_STIMULUS | MLH3         |
| GO_CELLULAR_RESPONSE_TO_DNA_DAMAGE_STIMULUS | MMS19        |

|                                             |         |
|---------------------------------------------|---------|
| GO_CELLULAR_RESPONSE_TO_DNA_DAMAGE_STIMULUS | MMS22L  |
| GO_CELLULAR_RESPONSE_TO_DNA_DAMAGE_STIMULUS | MNAT1   |
| GO_CELLULAR_RESPONSE_TO_DNA_DAMAGE_STIMULUS | MNDA    |
| GO_CELLULAR_RESPONSE_TO_DNA_DAMAGE_STIMULUS | MOAP1   |
| GO_CELLULAR_RESPONSE_TO_DNA_DAMAGE_STIMULUS | MORF4L1 |
| GO_CELLULAR_RESPONSE_TO_DNA_DAMAGE_STIMULUS | MORF4L2 |
| GO_CELLULAR_RESPONSE_TO_DNA_DAMAGE_STIMULUS | MPG     |
| GO_CELLULAR_RESPONSE_TO_DNA_DAMAGE_STIMULUS | MRE11A  |
| GO_CELLULAR_RESPONSE_TO_DNA_DAMAGE_STIMULUS | MRPS11  |
| GO_CELLULAR_RESPONSE_TO_DNA_DAMAGE_STIMULUS | MRPS26  |
| GO_CELLULAR_RESPONSE_TO_DNA_DAMAGE_STIMULUS | MRPS35  |
| GO_CELLULAR_RESPONSE_TO_DNA_DAMAGE_STIMULUS | MRPS9   |
| GO_CELLULAR_RESPONSE_TO_DNA_DAMAGE_STIMULUS | MSH2    |
| GO_CELLULAR_RESPONSE_TO_DNA_DAMAGE_STIMULUS | MSH3    |
| GO_CELLULAR_RESPONSE_TO_DNA_DAMAGE_STIMULUS | MSH4    |
| GO_CELLULAR_RESPONSE_TO_DNA_DAMAGE_STIMULUS | MSH5    |
| GO_CELLULAR_RESPONSE_TO_DNA_DAMAGE_STIMULUS | MSH6    |
| GO_CELLULAR_RESPONSE_TO_DNA_DAMAGE_STIMULUS | MTA1    |
| GO_CELLULAR_RESPONSE_TO_DNA_DAMAGE_STIMULUS | MTOR    |
| GO_CELLULAR_RESPONSE_TO_DNA_DAMAGE_STIMULUS | MUC1    |
| GO_CELLULAR_RESPONSE_TO_DNA_DAMAGE_STIMULUS | MUM1    |
| GO_CELLULAR_RESPONSE_TO_DNA_DAMAGE_STIMULUS | MUS81   |
| GO_CELLULAR_RESPONSE_TO_DNA_DAMAGE_STIMULUS | MUTYH   |
| GO_CELLULAR_RESPONSE_TO_DNA_DAMAGE_STIMULUS | MYC     |
| GO_CELLULAR_RESPONSE_TO_DNA_DAMAGE_STIMULUS | MYO6    |
| GO_CELLULAR_RESPONSE_TO_DNA_DAMAGE_STIMULUS | NBN     |
| GO_CELLULAR_RESPONSE_TO_DNA_DAMAGE_STIMULUS | NCOA6   |
| GO_CELLULAR_RESPONSE_TO_DNA_DAMAGE_STIMULUS | NDNL2   |
| GO_CELLULAR_RESPONSE_TO_DNA_DAMAGE_STIMULUS | NDRG1   |
| GO_CELLULAR_RESPONSE_TO_DNA_DAMAGE_STIMULUS | NEIL1   |
| GO_CELLULAR_RESPONSE_TO_DNA_DAMAGE_STIMULUS | NEIL2   |
| GO_CELLULAR_RESPONSE_TO_DNA_DAMAGE_STIMULUS | NEIL3   |
| GO_CELLULAR_RESPONSE_TO_DNA_DAMAGE_STIMULUS | NEK11   |
| GO_CELLULAR_RESPONSE_TO_DNA_DAMAGE_STIMULUS | NEK4    |
| GO_CELLULAR_RESPONSE_TO_DNA_DAMAGE_STIMULUS | NEK6    |
| GO_CELLULAR_RESPONSE_TO_DNA_DAMAGE_STIMULUS | NFATC2  |
| GO_CELLULAR_RESPONSE_TO_DNA_DAMAGE_STIMULUS | NFATC4  |
| GO_CELLULAR_RESPONSE_TO_DNA_DAMAGE_STIMULUS | NFRKB   |
| GO_CELLULAR_RESPONSE_TO_DNA_DAMAGE_STIMULUS | NHEJ1   |
| GO_CELLULAR_RESPONSE_TO_DNA_DAMAGE_STIMULUS | NIPBL   |
| GO_CELLULAR_RESPONSE_TO_DNA_DAMAGE_STIMULUS | NONO    |
| GO_CELLULAR_RESPONSE_TO_DNA_DAMAGE_STIMULUS | NPAS2   |
| GO_CELLULAR_RESPONSE_TO_DNA_DAMAGE_STIMULUS | NPLOC4  |
| GO_CELLULAR_RESPONSE_TO_DNA_DAMAGE_STIMULUS | NPM1    |
| GO_CELLULAR_RESPONSE_TO_DNA_DAMAGE_STIMULUS | NSMCE1  |
| GO_CELLULAR_RESPONSE_TO_DNA_DAMAGE_STIMULUS | NSMCE2  |
| GO_CELLULAR_RESPONSE_TO_DNA_DAMAGE_STIMULUS | NSMCE4A |

|                                             |        |
|---------------------------------------------|--------|
| GO_CELLULAR_RESPONSE_TO_DNA_DAMAGE_STIMULUS | NTHL1  |
| GO_CELLULAR_RESPONSE_TO_DNA_DAMAGE_STIMULUS | NUAK1  |
| GO_CELLULAR_RESPONSE_TO_DNA_DAMAGE_STIMULUS | NUDT1  |
| GO_CELLULAR_RESPONSE_TO_DNA_DAMAGE_STIMULUS | NUPR1  |
| GO_CELLULAR_RESPONSE_TO_DNA_DAMAGE_STIMULUS | OBFC2A |
| GO_CELLULAR_RESPONSE_TO_DNA_DAMAGE_STIMULUS | OBFC2B |
| GO_CELLULAR_RESPONSE_TO_DNA_DAMAGE_STIMULUS | OGG1   |
| GO_CELLULAR_RESPONSE_TO_DNA_DAMAGE_STIMULUS | OTUB1  |
| GO_CELLULAR_RESPONSE_TO_DNA_DAMAGE_STIMULUS | PALB2  |
| GO_CELLULAR_RESPONSE_TO_DNA_DAMAGE_STIMULUS | PAPD7  |
| GO_CELLULAR_RESPONSE_TO_DNA_DAMAGE_STIMULUS | PARP1  |
| GO_CELLULAR_RESPONSE_TO_DNA_DAMAGE_STIMULUS | PARP2  |
| GO_CELLULAR_RESPONSE_TO_DNA_DAMAGE_STIMULUS | PARP3  |
| GO_CELLULAR_RESPONSE_TO_DNA_DAMAGE_STIMULUS | PARP4  |
| GO_CELLULAR_RESPONSE_TO_DNA_DAMAGE_STIMULUS | PARP9  |
| GO_CELLULAR_RESPONSE_TO_DNA_DAMAGE_STIMULUS | PAXIP1 |
| GO_CELLULAR_RESPONSE_TO_DNA_DAMAGE_STIMULUS | PCBP4  |
| GO_CELLULAR_RESPONSE_TO_DNA_DAMAGE_STIMULUS | PCNA   |
| GO_CELLULAR_RESPONSE_TO_DNA_DAMAGE_STIMULUS | PEA15  |
| GO_CELLULAR_RESPONSE_TO_DNA_DAMAGE_STIMULUS | PGAP2  |
| GO_CELLULAR_RESPONSE_TO_DNA_DAMAGE_STIMULUS | PHF1   |
| GO_CELLULAR_RESPONSE_TO_DNA_DAMAGE_STIMULUS | PHLDA3 |
| GO_CELLULAR_RESPONSE_TO_DNA_DAMAGE_STIMULUS | PIAS4  |
| GO_CELLULAR_RESPONSE_TO_DNA_DAMAGE_STIMULUS | PIDD   |
| GO_CELLULAR_RESPONSE_TO_DNA_DAMAGE_STIMULUS | PIF1   |
| GO_CELLULAR_RESPONSE_TO_DNA_DAMAGE_STIMULUS | PIK3R1 |
| GO_CELLULAR_RESPONSE_TO_DNA_DAMAGE_STIMULUS | PLAGL1 |
| GO_CELLULAR_RESPONSE_TO_DNA_DAMAGE_STIMULUS | PLK1   |
| GO_CELLULAR_RESPONSE_TO_DNA_DAMAGE_STIMULUS | PLK2   |
| GO_CELLULAR_RESPONSE_TO_DNA_DAMAGE_STIMULUS | PLK3   |
| GO_CELLULAR_RESPONSE_TO_DNA_DAMAGE_STIMULUS | PLK5   |
| GO_CELLULAR_RESPONSE_TO_DNA_DAMAGE_STIMULUS | PMAIP1 |
| GO_CELLULAR_RESPONSE_TO_DNA_DAMAGE_STIMULUS | PML    |
| GO_CELLULAR_RESPONSE_TO_DNA_DAMAGE_STIMULUS | PMS1   |
| GO_CELLULAR_RESPONSE_TO_DNA_DAMAGE_STIMULUS | PMS2   |
| GO_CELLULAR_RESPONSE_TO_DNA_DAMAGE_STIMULUS | PMS2CL |
| GO_CELLULAR_RESPONSE_TO_DNA_DAMAGE_STIMULUS | PMS2P1 |
| GO_CELLULAR_RESPONSE_TO_DNA_DAMAGE_STIMULUS | PMS2P3 |
| GO_CELLULAR_RESPONSE_TO_DNA_DAMAGE_STIMULUS | PMS2P5 |
| GO_CELLULAR_RESPONSE_TO_DNA_DAMAGE_STIMULUS | PNKP   |
| GO_CELLULAR_RESPONSE_TO_DNA_DAMAGE_STIMULUS | POLA1  |
| GO_CELLULAR_RESPONSE_TO_DNA_DAMAGE_STIMULUS | POLB   |
| GO_CELLULAR_RESPONSE_TO_DNA_DAMAGE_STIMULUS | POLD1  |
| GO_CELLULAR_RESPONSE_TO_DNA_DAMAGE_STIMULUS | POLD2  |
| GO_CELLULAR_RESPONSE_TO_DNA_DAMAGE_STIMULUS | POLD3  |
| GO_CELLULAR_RESPONSE_TO_DNA_DAMAGE_STIMULUS | POLD4  |
| GO_CELLULAR_RESPONSE_TO_DNA_DAMAGE_STIMULUS | POLE   |

|                                             |          |
|---------------------------------------------|----------|
| GO_CELLULAR_RESPONSE_TO_DNA_DAMAGE_STIMULUS | POLE2    |
| GO_CELLULAR_RESPONSE_TO_DNA_DAMAGE_STIMULUS | POLG     |
| GO_CELLULAR_RESPONSE_TO_DNA_DAMAGE_STIMULUS | POLG2    |
| GO_CELLULAR_RESPONSE_TO_DNA_DAMAGE_STIMULUS | POLH     |
| GO_CELLULAR_RESPONSE_TO_DNA_DAMAGE_STIMULUS | POLI     |
| GO_CELLULAR_RESPONSE_TO_DNA_DAMAGE_STIMULUS | POLK     |
| GO_CELLULAR_RESPONSE_TO_DNA_DAMAGE_STIMULUS | POLL     |
| GO_CELLULAR_RESPONSE_TO_DNA_DAMAGE_STIMULUS | POLM     |
| GO_CELLULAR_RESPONSE_TO_DNA_DAMAGE_STIMULUS | POLN     |
| GO_CELLULAR_RESPONSE_TO_DNA_DAMAGE_STIMULUS | POLQ     |
| GO_CELLULAR_RESPONSE_TO_DNA_DAMAGE_STIMULUS | POLR2A   |
| GO_CELLULAR_RESPONSE_TO_DNA_DAMAGE_STIMULUS | POLR2B   |
| GO_CELLULAR_RESPONSE_TO_DNA_DAMAGE_STIMULUS | POLR2C   |
| GO_CELLULAR_RESPONSE_TO_DNA_DAMAGE_STIMULUS | POLR2D   |
| GO_CELLULAR_RESPONSE_TO_DNA_DAMAGE_STIMULUS | POLR2E   |
| GO_CELLULAR_RESPONSE_TO_DNA_DAMAGE_STIMULUS | POLR2F   |
| GO_CELLULAR_RESPONSE_TO_DNA_DAMAGE_STIMULUS | POLR2G   |
| GO_CELLULAR_RESPONSE_TO_DNA_DAMAGE_STIMULUS | POLR2H   |
| GO_CELLULAR_RESPONSE_TO_DNA_DAMAGE_STIMULUS | POLR2I   |
| GO_CELLULAR_RESPONSE_TO_DNA_DAMAGE_STIMULUS | POLR2J   |
| GO_CELLULAR_RESPONSE_TO_DNA_DAMAGE_STIMULUS | POLR2K   |
| GO_CELLULAR_RESPONSE_TO_DNA_DAMAGE_STIMULUS | POLR2L   |
| GO_CELLULAR_RESPONSE_TO_DNA_DAMAGE_STIMULUS | PPIE     |
| GO_CELLULAR_RESPONSE_TO_DNA_DAMAGE_STIMULUS | PPP1R15A |
| GO_CELLULAR_RESPONSE_TO_DNA_DAMAGE_STIMULUS | PPP2R5C  |
| GO_CELLULAR_RESPONSE_TO_DNA_DAMAGE_STIMULUS | PPP5C    |
| GO_CELLULAR_RESPONSE_TO_DNA_DAMAGE_STIMULUS | PRKDC    |
| GO_CELLULAR_RESPONSE_TO_DNA_DAMAGE_STIMULUS | PRMT1    |
| GO_CELLULAR_RESPONSE_TO_DNA_DAMAGE_STIMULUS | PRMT6    |
| GO_CELLULAR_RESPONSE_TO_DNA_DAMAGE_STIMULUS | PRPF19   |
| GO_CELLULAR_RESPONSE_TO_DNA_DAMAGE_STIMULUS | PSEN1    |
| GO_CELLULAR_RESPONSE_TO_DNA_DAMAGE_STIMULUS | PSMD14   |
| GO_CELLULAR_RESPONSE_TO_DNA_DAMAGE_STIMULUS | PSME4    |
| GO_CELLULAR_RESPONSE_TO_DNA_DAMAGE_STIMULUS | PTPN11   |
| GO_CELLULAR_RESPONSE_TO_DNA_DAMAGE_STIMULUS | PTTG1    |
| GO_CELLULAR_RESPONSE_TO_DNA_DAMAGE_STIMULUS | PYCARD   |
| GO_CELLULAR_RESPONSE_TO_DNA_DAMAGE_STIMULUS | RAD1     |
| GO_CELLULAR_RESPONSE_TO_DNA_DAMAGE_STIMULUS | RAD17    |
| GO_CELLULAR_RESPONSE_TO_DNA_DAMAGE_STIMULUS | RAD18    |
| GO_CELLULAR_RESPONSE_TO_DNA_DAMAGE_STIMULUS | RAD21    |
| GO_CELLULAR_RESPONSE_TO_DNA_DAMAGE_STIMULUS | RAD21L1  |
| GO_CELLULAR_RESPONSE_TO_DNA_DAMAGE_STIMULUS | RAD23A   |
| GO_CELLULAR_RESPONSE_TO_DNA_DAMAGE_STIMULUS | RAD23B   |
| GO_CELLULAR_RESPONSE_TO_DNA_DAMAGE_STIMULUS | RAD50    |
| GO_CELLULAR_RESPONSE_TO_DNA_DAMAGE_STIMULUS | RAD51    |
| GO_CELLULAR_RESPONSE_TO_DNA_DAMAGE_STIMULUS | RAD51AP1 |
| GO_CELLULAR_RESPONSE_TO_DNA_DAMAGE_STIMULUS | RAD51B   |



|                                             |          |
|---------------------------------------------|----------|
| GO_CELLULAR_RESPONSE_TO_DNA_DAMAGE_STIMULUS | RAD51C   |
| GO_CELLULAR_RESPONSE_TO_DNA_DAMAGE_STIMULUS | RAD51D   |
| GO_CELLULAR_RESPONSE_TO_DNA_DAMAGE_STIMULUS | RAD52    |
| GO_CELLULAR_RESPONSE_TO_DNA_DAMAGE_STIMULUS | RAD54B   |
| GO_CELLULAR_RESPONSE_TO_DNA_DAMAGE_STIMULUS | RAD54L   |
| GO_CELLULAR_RESPONSE_TO_DNA_DAMAGE_STIMULUS | RAD9A    |
| GO_CELLULAR_RESPONSE_TO_DNA_DAMAGE_STIMULUS | RAD9B    |
| GO_CELLULAR_RESPONSE_TO_DNA_DAMAGE_STIMULUS | RASSF1   |
| GO_CELLULAR_RESPONSE_TO_DNA_DAMAGE_STIMULUS | RBBP5    |
| GO_CELLULAR_RESPONSE_TO_DNA_DAMAGE_STIMULUS | RBBP6    |
| GO_CELLULAR_RESPONSE_TO_DNA_DAMAGE_STIMULUS | RBBP8    |
| GO_CELLULAR_RESPONSE_TO_DNA_DAMAGE_STIMULUS | RBL2     |
| GO_CELLULAR_RESPONSE_TO_DNA_DAMAGE_STIMULUS | RBM14    |
| GO_CELLULAR_RESPONSE_TO_DNA_DAMAGE_STIMULUS | RBM38    |
| GO_CELLULAR_RESPONSE_TO_DNA_DAMAGE_STIMULUS | RBX1     |
| GO_CELLULAR_RESPONSE_TO_DNA_DAMAGE_STIMULUS | RCHY1    |
| GO_CELLULAR_RESPONSE_TO_DNA_DAMAGE_STIMULUS | REC8     |
| GO_CELLULAR_RESPONSE_TO_DNA_DAMAGE_STIMULUS | RECQL    |
| GO_CELLULAR_RESPONSE_TO_DNA_DAMAGE_STIMULUS | RECQL4   |
| GO_CELLULAR_RESPONSE_TO_DNA_DAMAGE_STIMULUS | RECQL5   |
| GO_CELLULAR_RESPONSE_TO_DNA_DAMAGE_STIMULUS | REV1     |
| GO_CELLULAR_RESPONSE_TO_DNA_DAMAGE_STIMULUS | REV3L    |
| GO_CELLULAR_RESPONSE_TO_DNA_DAMAGE_STIMULUS | RFC1     |
| GO_CELLULAR_RESPONSE_TO_DNA_DAMAGE_STIMULUS | RFC2     |
| GO_CELLULAR_RESPONSE_TO_DNA_DAMAGE_STIMULUS | RFC3     |
| GO_CELLULAR_RESPONSE_TO_DNA_DAMAGE_STIMULUS | RFC4     |
| GO_CELLULAR_RESPONSE_TO_DNA_DAMAGE_STIMULUS | RFC5     |
| GO_CELLULAR_RESPONSE_TO_DNA_DAMAGE_STIMULUS | RFWD3    |
| GO_CELLULAR_RESPONSE_TO_DNA_DAMAGE_STIMULUS | RIF1     |
| GO_CELLULAR_RESPONSE_TO_DNA_DAMAGE_STIMULUS | RMI1     |
| GO_CELLULAR_RESPONSE_TO_DNA_DAMAGE_STIMULUS | RMI2     |
| GO_CELLULAR_RESPONSE_TO_DNA_DAMAGE_STIMULUS | RNASEH2A |
| GO_CELLULAR_RESPONSE_TO_DNA_DAMAGE_STIMULUS | RNF111   |
| GO_CELLULAR_RESPONSE_TO_DNA_DAMAGE_STIMULUS | RNF138   |
| GO_CELLULAR_RESPONSE_TO_DNA_DAMAGE_STIMULUS | RNF168   |
| GO_CELLULAR_RESPONSE_TO_DNA_DAMAGE_STIMULUS | RNF169   |
| GO_CELLULAR_RESPONSE_TO_DNA_DAMAGE_STIMULUS | RNF8     |
| GO_CELLULAR_RESPONSE_TO_DNA_DAMAGE_STIMULUS | RPA1     |
| GO_CELLULAR_RESPONSE_TO_DNA_DAMAGE_STIMULUS | RPA2     |
| GO_CELLULAR_RESPONSE_TO_DNA_DAMAGE_STIMULUS | RPA3     |
| GO_CELLULAR_RESPONSE_TO_DNA_DAMAGE_STIMULUS | RPA4     |
| GO_CELLULAR_RESPONSE_TO_DNA_DAMAGE_STIMULUS | RPAIN    |
| GO_CELLULAR_RESPONSE_TO_DNA_DAMAGE_STIMULUS | RPS27A   |
| GO_CELLULAR_RESPONSE_TO_DNA_DAMAGE_STIMULUS | RPS27L   |
| GO_CELLULAR_RESPONSE_TO_DNA_DAMAGE_STIMULUS | RPS3     |
| GO_CELLULAR_RESPONSE_TO_DNA_DAMAGE_STIMULUS | RPS6KA6  |
| GO_CELLULAR_RESPONSE_TO_DNA_DAMAGE_STIMULUS | RQCD1    |

|                                             |         |
|---------------------------------------------|---------|
| GO_CELLULAR_RESPONSE_TO_DNA_DAMAGE_STIMULUS | RRM2B   |
| GO_CELLULAR_RESPONSE_TO_DNA_DAMAGE_STIMULUS | RTEL1   |
| GO_CELLULAR_RESPONSE_TO_DNA_DAMAGE_STIMULUS | RUVBL1  |
| GO_CELLULAR_RESPONSE_TO_DNA_DAMAGE_STIMULUS | RUVBL2  |
| GO_CELLULAR_RESPONSE_TO_DNA_DAMAGE_STIMULUS | SESN1   |
| GO_CELLULAR_RESPONSE_TO_DNA_DAMAGE_STIMULUS | SETD2   |
| GO_CELLULAR_RESPONSE_TO_DNA_DAMAGE_STIMULUS | SETD7   |
| GO_CELLULAR_RESPONSE_TO_DNA_DAMAGE_STIMULUS | SETMAR  |
| GO_CELLULAR_RESPONSE_TO_DNA_DAMAGE_STIMULUS | SETX    |
| GO_CELLULAR_RESPONSE_TO_DNA_DAMAGE_STIMULUS | SFN     |
| GO_CELLULAR_RESPONSE_TO_DNA_DAMAGE_STIMULUS | SFPQ    |
| GO_CELLULAR_RESPONSE_TO_DNA_DAMAGE_STIMULUS | SFR1    |
| GO_CELLULAR_RESPONSE_TO_DNA_DAMAGE_STIMULUS | SGK1    |
| GO_CELLULAR_RESPONSE_TO_DNA_DAMAGE_STIMULUS | SHFM1   |
| GO_CELLULAR_RESPONSE_TO_DNA_DAMAGE_STIMULUS | SHISA5  |
| GO_CELLULAR_RESPONSE_TO_DNA_DAMAGE_STIMULUS | SHPRH   |
| GO_CELLULAR_RESPONSE_TO_DNA_DAMAGE_STIMULUS | SIRT1   |
| GO_CELLULAR_RESPONSE_TO_DNA_DAMAGE_STIMULUS | SIRT4   |
| GO_CELLULAR_RESPONSE_TO_DNA_DAMAGE_STIMULUS | SIRT6   |
| GO_CELLULAR_RESPONSE_TO_DNA_DAMAGE_STIMULUS | SLC30A9 |
| GO_CELLULAR_RESPONSE_TO_DNA_DAMAGE_STIMULUS | SLX1A   |
| GO_CELLULAR_RESPONSE_TO_DNA_DAMAGE_STIMULUS | SLX1B   |
| GO_CELLULAR_RESPONSE_TO_DNA_DAMAGE_STIMULUS | SLX4    |
| GO_CELLULAR_RESPONSE_TO_DNA_DAMAGE_STIMULUS | SMARCA5 |
| GO_CELLULAR_RESPONSE_TO_DNA_DAMAGE_STIMULUS | SMARCA1 |
| GO_CELLULAR_RESPONSE_TO_DNA_DAMAGE_STIMULUS | SMARCA1 |
| GO_CELLULAR_RESPONSE_TO_DNA_DAMAGE_STIMULUS | SMARCB1 |
| GO_CELLULAR_RESPONSE_TO_DNA_DAMAGE_STIMULUS | SMC1A   |
| GO_CELLULAR_RESPONSE_TO_DNA_DAMAGE_STIMULUS | SMC3    |
| GO_CELLULAR_RESPONSE_TO_DNA_DAMAGE_STIMULUS | SMC5    |
| GO_CELLULAR_RESPONSE_TO_DNA_DAMAGE_STIMULUS | SMC6    |
| GO_CELLULAR_RESPONSE_TO_DNA_DAMAGE_STIMULUS | SMG1    |
| GO_CELLULAR_RESPONSE_TO_DNA_DAMAGE_STIMULUS | SMUG1   |
| GO_CELLULAR_RESPONSE_TO_DNA_DAMAGE_STIMULUS | SNW1    |
| GO_CELLULAR_RESPONSE_TO_DNA_DAMAGE_STIMULUS | SOX4    |
| GO_CELLULAR_RESPONSE_TO_DNA_DAMAGE_STIMULUS | SP100   |
| GO_CELLULAR_RESPONSE_TO_DNA_DAMAGE_STIMULUS | SPATA18 |
| GO_CELLULAR_RESPONSE_TO_DNA_DAMAGE_STIMULUS | SPATA22 |
| GO_CELLULAR_RESPONSE_TO_DNA_DAMAGE_STIMULUS | SPDYA   |
| GO_CELLULAR_RESPONSE_TO_DNA_DAMAGE_STIMULUS | SSRP1   |
| GO_CELLULAR_RESPONSE_TO_DNA_DAMAGE_STIMULUS | ST20    |
| GO_CELLULAR_RESPONSE_TO_DNA_DAMAGE_STIMULUS | STK11   |
| GO_CELLULAR_RESPONSE_TO_DNA_DAMAGE_STIMULUS | STRA13  |
| GO_CELLULAR_RESPONSE_TO_DNA_DAMAGE_STIMULUS | STUB1   |
| GO_CELLULAR_RESPONSE_TO_DNA_DAMAGE_STIMULUS | STXBP4  |
| GO_CELLULAR_RESPONSE_TO_DNA_DAMAGE_STIMULUS | SUMO1   |
| GO_CELLULAR_RESPONSE_TO_DNA_DAMAGE_STIMULUS | SUMO2   |

|                                             |          |
|---------------------------------------------|----------|
| GO_CELLULAR_RESPONSE_TO_DNA_DAMAGE_STIMULUS | SUMO3    |
| GO_CELLULAR_RESPONSE_TO_DNA_DAMAGE_STIMULUS | SUPT16H  |
| GO_CELLULAR_RESPONSE_TO_DNA_DAMAGE_STIMULUS | SUV39H1  |
| GO_CELLULAR_RESPONSE_TO_DNA_DAMAGE_STIMULUS | SWI5     |
| GO_CELLULAR_RESPONSE_TO_DNA_DAMAGE_STIMULUS | SYCP1    |
| GO_CELLULAR_RESPONSE_TO_DNA_DAMAGE_STIMULUS | SYF2     |
| GO_CELLULAR_RESPONSE_TO_DNA_DAMAGE_STIMULUS | TAF1     |
| GO_CELLULAR_RESPONSE_TO_DNA_DAMAGE_STIMULUS | TAF9     |
| GO_CELLULAR_RESPONSE_TO_DNA_DAMAGE_STIMULUS | TAOK1    |
| GO_CELLULAR_RESPONSE_TO_DNA_DAMAGE_STIMULUS | TAOK2    |
| GO_CELLULAR_RESPONSE_TO_DNA_DAMAGE_STIMULUS | TAOK3    |
| GO_CELLULAR_RESPONSE_TO_DNA_DAMAGE_STIMULUS | TCEA1    |
| GO_CELLULAR_RESPONSE_TO_DNA_DAMAGE_STIMULUS | TDG      |
| GO_CELLULAR_RESPONSE_TO_DNA_DAMAGE_STIMULUS | TDP1     |
| GO_CELLULAR_RESPONSE_TO_DNA_DAMAGE_STIMULUS | TDP2     |
| GO_CELLULAR_RESPONSE_TO_DNA_DAMAGE_STIMULUS | TERF2    |
| GO_CELLULAR_RESPONSE_TO_DNA_DAMAGE_STIMULUS | TERF2IP  |
| GO_CELLULAR_RESPONSE_TO_DNA_DAMAGE_STIMULUS | TEX12    |
| GO_CELLULAR_RESPONSE_TO_DNA_DAMAGE_STIMULUS | TEX15    |
| GO_CELLULAR_RESPONSE_TO_DNA_DAMAGE_STIMULUS | TFAP4    |
| GO_CELLULAR_RESPONSE_TO_DNA_DAMAGE_STIMULUS | TFDP1    |
| GO_CELLULAR_RESPONSE_TO_DNA_DAMAGE_STIMULUS | TFDP2    |
| GO_CELLULAR_RESPONSE_TO_DNA_DAMAGE_STIMULUS | TFDP3    |
| GO_CELLULAR_RESPONSE_TO_DNA_DAMAGE_STIMULUS | TFIP11   |
| GO_CELLULAR_RESPONSE_TO_DNA_DAMAGE_STIMULUS | TFPT     |
| GO_CELLULAR_RESPONSE_TO_DNA_DAMAGE_STIMULUS | THOC1    |
| GO_CELLULAR_RESPONSE_TO_DNA_DAMAGE_STIMULUS | THOC4    |
| GO_CELLULAR_RESPONSE_TO_DNA_DAMAGE_STIMULUS | TIMELESS |
| GO_CELLULAR_RESPONSE_TO_DNA_DAMAGE_STIMULUS | TIPIN    |
| GO_CELLULAR_RESPONSE_TO_DNA_DAMAGE_STIMULUS | TIPRL    |
| GO_CELLULAR_RESPONSE_TO_DNA_DAMAGE_STIMULUS | TLK1     |
| GO_CELLULAR_RESPONSE_TO_DNA_DAMAGE_STIMULUS | TLK2     |
| GO_CELLULAR_RESPONSE_TO_DNA_DAMAGE_STIMULUS | TMEM109  |
| GO_CELLULAR_RESPONSE_TO_DNA_DAMAGE_STIMULUS | TNF      |
| GO_CELLULAR_RESPONSE_TO_DNA_DAMAGE_STIMULUS | TNFRSF1A |
| GO_CELLULAR_RESPONSE_TO_DNA_DAMAGE_STIMULUS | TNFRSF1B |
| GO_CELLULAR_RESPONSE_TO_DNA_DAMAGE_STIMULUS | TNKS1BP1 |
| GO_CELLULAR_RESPONSE_TO_DNA_DAMAGE_STIMULUS | TNP1     |
| GO_CELLULAR_RESPONSE_TO_DNA_DAMAGE_STIMULUS | TONSL    |
| GO_CELLULAR_RESPONSE_TO_DNA_DAMAGE_STIMULUS | TOP2A    |
| GO_CELLULAR_RESPONSE_TO_DNA_DAMAGE_STIMULUS | TOP3A    |
| GO_CELLULAR_RESPONSE_TO_DNA_DAMAGE_STIMULUS | TOPBP1   |
| GO_CELLULAR_RESPONSE_TO_DNA_DAMAGE_STIMULUS | TOPORS   |
| GO_CELLULAR_RESPONSE_TO_DNA_DAMAGE_STIMULUS | TP53     |
| GO_CELLULAR_RESPONSE_TO_DNA_DAMAGE_STIMULUS | TP53BP1  |
| GO_CELLULAR_RESPONSE_TO_DNA_DAMAGE_STIMULUS | TP53TG1  |
| GO_CELLULAR_RESPONSE_TO_DNA_DAMAGE_STIMULUS | TP63     |

|                                             |        |
|---------------------------------------------|--------|
| GO_CELLULAR_RESPONSE_TO_DNA_DAMAGE_STIMULUS | TP73   |
| GO_CELLULAR_RESPONSE_TO_DNA_DAMAGE_STIMULUS | TREX1  |
| GO_CELLULAR_RESPONSE_TO_DNA_DAMAGE_STIMULUS | TREX2  |
| GO_CELLULAR_RESPONSE_TO_DNA_DAMAGE_STIMULUS | TRIAP1 |
| GO_CELLULAR_RESPONSE_TO_DNA_DAMAGE_STIMULUS | TRIM25 |
| GO_CELLULAR_RESPONSE_TO_DNA_DAMAGE_STIMULUS | TRIM28 |
| GO_CELLULAR_RESPONSE_TO_DNA_DAMAGE_STIMULUS | TRIP12 |
| GO_CELLULAR_RESPONSE_TO_DNA_DAMAGE_STIMULUS | TRIP13 |
| GO_CELLULAR_RESPONSE_TO_DNA_DAMAGE_STIMULUS | TRRAP  |
| GO_CELLULAR_RESPONSE_TO_DNA_DAMAGE_STIMULUS | TTC5   |
| GO_CELLULAR_RESPONSE_TO_DNA_DAMAGE_STIMULUS | UBA1   |
| GO_CELLULAR_RESPONSE_TO_DNA_DAMAGE_STIMULUS | UBA52  |
| GO_CELLULAR_RESPONSE_TO_DNA_DAMAGE_STIMULUS | UBA7   |
| GO_CELLULAR_RESPONSE_TO_DNA_DAMAGE_STIMULUS | UBB    |
| GO_CELLULAR_RESPONSE_TO_DNA_DAMAGE_STIMULUS | UBC    |
| GO_CELLULAR_RESPONSE_TO_DNA_DAMAGE_STIMULUS | UBE2A  |
| GO_CELLULAR_RESPONSE_TO_DNA_DAMAGE_STIMULUS | UBE2B  |
| GO_CELLULAR_RESPONSE_TO_DNA_DAMAGE_STIMULUS | UBE2D3 |
| GO_CELLULAR_RESPONSE_TO_DNA_DAMAGE_STIMULUS | UBE2E2 |
| GO_CELLULAR_RESPONSE_TO_DNA_DAMAGE_STIMULUS | UBE2F  |
| GO_CELLULAR_RESPONSE_TO_DNA_DAMAGE_STIMULUS | UBE2I  |
| GO_CELLULAR_RESPONSE_TO_DNA_DAMAGE_STIMULUS | UBE2L6 |
| GO_CELLULAR_RESPONSE_TO_DNA_DAMAGE_STIMULUS | UBE2N  |
| GO_CELLULAR_RESPONSE_TO_DNA_DAMAGE_STIMULUS | UBE2NL |
| GO_CELLULAR_RESPONSE_TO_DNA_DAMAGE_STIMULUS | UBE2T  |
| GO_CELLULAR_RESPONSE_TO_DNA_DAMAGE_STIMULUS | UBE2U  |
| GO_CELLULAR_RESPONSE_TO_DNA_DAMAGE_STIMULUS | UBE2V1 |
| GO_CELLULAR_RESPONSE_TO_DNA_DAMAGE_STIMULUS | UBE2V2 |
| GO_CELLULAR_RESPONSE_TO_DNA_DAMAGE_STIMULUS | UBE2W  |
| GO_CELLULAR_RESPONSE_TO_DNA_DAMAGE_STIMULUS | UBR5   |
| GO_CELLULAR_RESPONSE_TO_DNA_DAMAGE_STIMULUS | UCHL5  |
| GO_CELLULAR_RESPONSE_TO_DNA_DAMAGE_STIMULUS | UFD1L  |
| GO_CELLULAR_RESPONSE_TO_DNA_DAMAGE_STIMULUS | UHRF1  |
| GO_CELLULAR_RESPONSE_TO_DNA_DAMAGE_STIMULUS | UIMC1  |
| GO_CELLULAR_RESPONSE_TO_DNA_DAMAGE_STIMULUS | UNG    |
| GO_CELLULAR_RESPONSE_TO_DNA_DAMAGE_STIMULUS | UPF1   |
| GO_CELLULAR_RESPONSE_TO_DNA_DAMAGE_STIMULUS | USP1   |
| GO_CELLULAR_RESPONSE_TO_DNA_DAMAGE_STIMULUS | USP10  |
| GO_CELLULAR_RESPONSE_TO_DNA_DAMAGE_STIMULUS | USP16  |
| GO_CELLULAR_RESPONSE_TO_DNA_DAMAGE_STIMULUS | USP28  |
| GO_CELLULAR_RESPONSE_TO_DNA_DAMAGE_STIMULUS | USP3   |
| GO_CELLULAR_RESPONSE_TO_DNA_DAMAGE_STIMULUS | USP43  |
| GO_CELLULAR_RESPONSE_TO_DNA_DAMAGE_STIMULUS | USP45  |
| GO_CELLULAR_RESPONSE_TO_DNA_DAMAGE_STIMULUS | USP47  |
| GO_CELLULAR_RESPONSE_TO_DNA_DAMAGE_STIMULUS | USP7   |
| GO_CELLULAR_RESPONSE_TO_DNA_DAMAGE_STIMULUS | UVRAG  |
| GO_CELLULAR_RESPONSE_TO_DNA_DAMAGE_STIMULUS | VAV3   |

|                                             |          |
|---------------------------------------------|----------|
| GO_CELLULAR_RESPONSE_TO_DNA_DAMAGE_STIMULUS | VCP      |
| GO_CELLULAR_RESPONSE_TO_DNA_DAMAGE_STIMULUS | WAC      |
| GO_CELLULAR_RESPONSE_TO_DNA_DAMAGE_STIMULUS | WDR33    |
| GO_CELLULAR_RESPONSE_TO_DNA_DAMAGE_STIMULUS | WDR48    |
| GO_CELLULAR_RESPONSE_TO_DNA_DAMAGE_STIMULUS | WDR76    |
| GO_CELLULAR_RESPONSE_TO_DNA_DAMAGE_STIMULUS | WHSC1    |
| GO_CELLULAR_RESPONSE_TO_DNA_DAMAGE_STIMULUS | WNT1     |
| GO_CELLULAR_RESPONSE_TO_DNA_DAMAGE_STIMULUS | WRN      |
| GO_CELLULAR_RESPONSE_TO_DNA_DAMAGE_STIMULUS | WRNIP1   |
| GO_CELLULAR_RESPONSE_TO_DNA_DAMAGE_STIMULUS | XAB2     |
| GO_CELLULAR_RESPONSE_TO_DNA_DAMAGE_STIMULUS | XIAP     |
| GO_CELLULAR_RESPONSE_TO_DNA_DAMAGE_STIMULUS | XPA      |
| GO_CELLULAR_RESPONSE_TO_DNA_DAMAGE_STIMULUS | XPC      |
| GO_CELLULAR_RESPONSE_TO_DNA_DAMAGE_STIMULUS | XRCC1    |
| GO_CELLULAR_RESPONSE_TO_DNA_DAMAGE_STIMULUS | XRCC2    |
| GO_CELLULAR_RESPONSE_TO_DNA_DAMAGE_STIMULUS | XRCC3    |
| GO_CELLULAR_RESPONSE_TO_DNA_DAMAGE_STIMULUS | XRCC4    |
| GO_CELLULAR_RESPONSE_TO_DNA_DAMAGE_STIMULUS | XRCC5    |
| GO_CELLULAR_RESPONSE_TO_DNA_DAMAGE_STIMULUS | XRCC6    |
| GO_CELLULAR_RESPONSE_TO_DNA_DAMAGE_STIMULUS | XRCC6BP1 |
| GO_CELLULAR_RESPONSE_TO_DNA_DAMAGE_STIMULUS | YAP1     |
| GO_CELLULAR_RESPONSE_TO_DNA_DAMAGE_STIMULUS | YY1      |
| GO_CELLULAR_RESPONSE_TO_DNA_DAMAGE_STIMULUS | ZAK      |
| GO_CELLULAR_RESPONSE_TO_DNA_DAMAGE_STIMULUS | ZBTB1    |
| GO_CELLULAR_RESPONSE_TO_DNA_DAMAGE_STIMULUS | ZBTB32   |
| GO_CELLULAR_RESPONSE_TO_DNA_DAMAGE_STIMULUS | ZBTB38   |
| GO_CELLULAR_RESPONSE_TO_DNA_DAMAGE_STIMULUS | ZBTB4    |
| GO_CELLULAR_RESPONSE_TO_DNA_DAMAGE_STIMULUS | ZBTB40   |
| GO_CELLULAR_RESPONSE_TO_DNA_DAMAGE_STIMULUS | ZFYVE26  |
| GO_CELLULAR_RESPONSE_TO_DNA_DAMAGE_STIMULUS | ZMAT3    |
| GO_CELLULAR_RESPONSE_TO_DNA_DAMAGE_STIMULUS | ZNF385A  |
| GO_CELLULAR_RESPONSE_TO_DNA_DAMAGE_STIMULUS | ZNF830   |
| GO_CELLULAR_RESPONSE_TO_DNA_DAMAGE_STIMULUS | ZRANB3   |
| GO_CELLULAR_RESPONSE_TO_DNA_DAMAGE_STIMULUS | ZSWIM7   |
| GO_INNATE_IMMUNE_RESPONSE                   | ABL1     |
| GO_INNATE_IMMUNE_RESPONSE                   | ABL2     |
| GO_INNATE_IMMUNE_RESPONSE                   | ADAM15   |
| GO_INNATE_IMMUNE_RESPONSE                   | ADAMTS13 |
| GO_INNATE_IMMUNE_RESPONSE                   | ADAR     |
| GO_INNATE_IMMUNE_RESPONSE                   | ADARB1   |
| GO_INNATE_IMMUNE_RESPONSE                   | AGER     |
| GO_INNATE_IMMUNE_RESPONSE                   | AIF1     |
| GO_INNATE_IMMUNE_RESPONSE                   | AIM2     |
| GO_INNATE_IMMUNE_RESPONSE                   | AKAP8    |
| GO_INNATE_IMMUNE_RESPONSE                   | AKIRIN2  |
| GO_INNATE_IMMUNE_RESPONSE                   | ANG      |
| GO_INNATE_IMMUNE_RESPONSE                   | ANKHD1   |

|                           |          |
|---------------------------|----------|
| GO_INNATE_IMMUNE_RESPONSE | ANKRD17  |
| GO_INNATE_IMMUNE_RESPONSE | ANXA1    |
| GO_INNATE_IMMUNE_RESPONSE | APCS     |
| GO_INNATE_IMMUNE_RESPONSE | APOA4    |
| GO_INNATE_IMMUNE_RESPONSE | APOBEC3A |
| GO_INNATE_IMMUNE_RESPONSE | APOBEC3B |
| GO_INNATE_IMMUNE_RESPONSE | APOBEC3C |
| GO_INNATE_IMMUNE_RESPONSE | APOBEC3D |
| GO_INNATE_IMMUNE_RESPONSE | APOBEC3F |
| GO_INNATE_IMMUNE_RESPONSE | APOBEC3G |
| GO_INNATE_IMMUNE_RESPONSE | APOBEC3H |
| GO_INNATE_IMMUNE_RESPONSE | APOL1    |
| GO_INNATE_IMMUNE_RESPONSE | APP      |
| GO_INNATE_IMMUNE_RESPONSE | AQP4     |
| GO_INNATE_IMMUNE_RESPONSE | ARHGEF2  |
| GO_INNATE_IMMUNE_RESPONSE | ASS1     |
| GO_INNATE_IMMUNE_RESPONSE | ATG12    |
| GO_INNATE_IMMUNE_RESPONSE | ATG5     |
| GO_INNATE_IMMUNE_RESPONSE | AXL      |
| GO_INNATE_IMMUNE_RESPONSE | B2M      |
| GO_INNATE_IMMUNE_RESPONSE | BCL10    |
| GO_INNATE_IMMUNE_RESPONSE | BLK      |
| GO_INNATE_IMMUNE_RESPONSE | BMX      |
| GO_INNATE_IMMUNE_RESPONSE | BPIFA1   |
| GO_INNATE_IMMUNE_RESPONSE | BPIFB1   |
| GO_INNATE_IMMUNE_RESPONSE | BPIFB3   |
| GO_INNATE_IMMUNE_RESPONSE | BST2     |
| GO_INNATE_IMMUNE_RESPONSE | BTK      |
| GO_INNATE_IMMUNE_RESPONSE | C19orf29 |
| GO_INNATE_IMMUNE_RESPONSE | C19orf66 |
| GO_INNATE_IMMUNE_RESPONSE | C1QA     |
| GO_INNATE_IMMUNE_RESPONSE | C1QB     |
| GO_INNATE_IMMUNE_RESPONSE | C1QBP    |
| GO_INNATE_IMMUNE_RESPONSE | C1QC     |
| GO_INNATE_IMMUNE_RESPONSE | C1R      |
| GO_INNATE_IMMUNE_RESPONSE | C1RL     |
| GO_INNATE_IMMUNE_RESPONSE | C1S      |
| GO_INNATE_IMMUNE_RESPONSE | C2       |
| GO_INNATE_IMMUNE_RESPONSE | C3       |
| GO_INNATE_IMMUNE_RESPONSE | C4A      |
| GO_INNATE_IMMUNE_RESPONSE | C4B      |
| GO_INNATE_IMMUNE_RESPONSE | C4BPA    |
| GO_INNATE_IMMUNE_RESPONSE | C4BPB    |
| GO_INNATE_IMMUNE_RESPONSE | C5       |
| GO_INNATE_IMMUNE_RESPONSE | C6       |
| GO_INNATE_IMMUNE_RESPONSE | C6orf57  |
| GO_INNATE_IMMUNE_RESPONSE | C7       |

|                           |          |
|---------------------------|----------|
| GO_INNATE_IMMUNE_RESPONSE | C8A      |
| GO_INNATE_IMMUNE_RESPONSE | C8B      |
| GO_INNATE_IMMUNE_RESPONSE | C8G      |
| GO_INNATE_IMMUNE_RESPONSE | C9       |
| GO_INNATE_IMMUNE_RESPONSE | CALCA    |
| GO_INNATE_IMMUNE_RESPONSE | CALCOCO2 |
| GO_INNATE_IMMUNE_RESPONSE | CAMK2A   |
| GO_INNATE_IMMUNE_RESPONSE | CAMK2B   |
| GO_INNATE_IMMUNE_RESPONSE | CAMK2D   |
| GO_INNATE_IMMUNE_RESPONSE | CAMK2G   |
| GO_INNATE_IMMUNE_RESPONSE | CAMP     |
| GO_INNATE_IMMUNE_RESPONSE | CAPZA1   |
| GO_INNATE_IMMUNE_RESPONSE | CAPZA2   |
| GO_INNATE_IMMUNE_RESPONSE | CARD9    |
| GO_INNATE_IMMUNE_RESPONSE | CASP4    |
| GO_INNATE_IMMUNE_RESPONSE | CCL1     |
| GO_INNATE_IMMUNE_RESPONSE | CCL11    |
| GO_INNATE_IMMUNE_RESPONSE | CCL13    |
| GO_INNATE_IMMUNE_RESPONSE | CCL14    |
| GO_INNATE_IMMUNE_RESPONSE | CCL15    |
| GO_INNATE_IMMUNE_RESPONSE | CCL16    |
| GO_INNATE_IMMUNE_RESPONSE | CCL17    |
| GO_INNATE_IMMUNE_RESPONSE | CCL18    |
| GO_INNATE_IMMUNE_RESPONSE | CCL19    |
| GO_INNATE_IMMUNE_RESPONSE | CCL2     |
| GO_INNATE_IMMUNE_RESPONSE | CCL20    |
| GO_INNATE_IMMUNE_RESPONSE | CCL21    |
| GO_INNATE_IMMUNE_RESPONSE | CCL22    |
| GO_INNATE_IMMUNE_RESPONSE | CCL23    |
| GO_INNATE_IMMUNE_RESPONSE | CCL24    |
| GO_INNATE_IMMUNE_RESPONSE | CCL25    |
| GO_INNATE_IMMUNE_RESPONSE | CCL26    |
| GO_INNATE_IMMUNE_RESPONSE | CCL3     |
| GO_INNATE_IMMUNE_RESPONSE | CCL3L1   |
| GO_INNATE_IMMUNE_RESPONSE | CCL3L3   |
| GO_INNATE_IMMUNE_RESPONSE | CCL4     |
| GO_INNATE_IMMUNE_RESPONSE | CCL4L2   |
| GO_INNATE_IMMUNE_RESPONSE | CCL5     |
| GO_INNATE_IMMUNE_RESPONSE | CCL7     |
| GO_INNATE_IMMUNE_RESPONSE | CCL8     |
| GO_INNATE_IMMUNE_RESPONSE | CD14     |
| GO_INNATE_IMMUNE_RESPONSE | CD180    |
| GO_INNATE_IMMUNE_RESPONSE | CD1D     |
| GO_INNATE_IMMUNE_RESPONSE | CD209    |
| GO_INNATE_IMMUNE_RESPONSE | CD244    |
| GO_INNATE_IMMUNE_RESPONSE | CD300E   |
| GO_INNATE_IMMUNE_RESPONSE | CD300LB  |

|                           |         |
|---------------------------|---------|
| GO_INNATE_IMMUNE_RESPONSE | CD44    |
| GO_INNATE_IMMUNE_RESPONSE | CD46    |
| GO_INNATE_IMMUNE_RESPONSE | CD55    |
| GO_INNATE_IMMUNE_RESPONSE | CD58    |
| GO_INNATE_IMMUNE_RESPONSE | CD6     |
| GO_INNATE_IMMUNE_RESPONSE | CD84    |
| GO_INNATE_IMMUNE_RESPONSE | CD86    |
| GO_INNATE_IMMUNE_RESPONSE | CEBPG   |
| GO_INNATE_IMMUNE_RESPONSE | CFB     |
| GO_INNATE_IMMUNE_RESPONSE | CFD     |
| GO_INNATE_IMMUNE_RESPONSE | CFH     |
| GO_INNATE_IMMUNE_RESPONSE | CFHR5   |
| GO_INNATE_IMMUNE_RESPONSE | CFI     |
| GO_INNATE_IMMUNE_RESPONSE | CFP     |
| GO_INNATE_IMMUNE_RESPONSE | CHGA    |
| GO_INNATE_IMMUNE_RESPONSE | CHID1   |
| GO_INNATE_IMMUNE_RESPONSE | CHUK    |
| GO_INNATE_IMMUNE_RESPONSE | CIITA   |
| GO_INNATE_IMMUNE_RESPONSE | CITED1  |
| GO_INNATE_IMMUNE_RESPONSE | CLEC10A |
| GO_INNATE_IMMUNE_RESPONSE | CLEC2A  |
| GO_INNATE_IMMUNE_RESPONSE | CLEC4A  |
| GO_INNATE_IMMUNE_RESPONSE | CLEC4C  |
| GO_INNATE_IMMUNE_RESPONSE | CLEC4D  |
| GO_INNATE_IMMUNE_RESPONSE | CLEC4E  |
| GO_INNATE_IMMUNE_RESPONSE | CLEC4M  |
| GO_INNATE_IMMUNE_RESPONSE | CLEC5A  |
| GO_INNATE_IMMUNE_RESPONSE | CLEC6A  |
| GO_INNATE_IMMUNE_RESPONSE | CLEC7A  |
| GO_INNATE_IMMUNE_RESPONSE | CLU     |
| GO_INNATE_IMMUNE_RESPONSE | CNPY3   |
| GO_INNATE_IMMUNE_RESPONSE | COLEC12 |
| GO_INNATE_IMMUNE_RESPONSE | CORO1A  |
| GO_INNATE_IMMUNE_RESPONSE | CR1     |
| GO_INNATE_IMMUNE_RESPONSE | CR2     |
| GO_INNATE_IMMUNE_RESPONSE | CRCP    |
| GO_INNATE_IMMUNE_RESPONSE | CRISP3  |
| GO_INNATE_IMMUNE_RESPONSE | CSF1    |
| GO_INNATE_IMMUNE_RESPONSE | CSF1R   |
| GO_INNATE_IMMUNE_RESPONSE | CSK     |
| GO_INNATE_IMMUNE_RESPONSE | CX3CL1  |
| GO_INNATE_IMMUNE_RESPONSE | CXCL16  |
| GO_INNATE_IMMUNE_RESPONSE | CYBA    |
| GO_INNATE_IMMUNE_RESPONSE | CYBB    |
| GO_INNATE_IMMUNE_RESPONSE | CYP27B1 |
| GO_INNATE_IMMUNE_RESPONSE | DAB2IP  |
| GO_INNATE_IMMUNE_RESPONSE | DAK     |



|                           |           |
|---------------------------|-----------|
| GO_INNATE_IMMUNE_RESPONSE | DAPK1     |
| GO_INNATE_IMMUNE_RESPONSE | DAPK3     |
| GO_INNATE_IMMUNE_RESPONSE | DDX3X     |
| GO_INNATE_IMMUNE_RESPONSE | DDX58     |
| GO_INNATE_IMMUNE_RESPONSE | DDX60     |
| GO_INNATE_IMMUNE_RESPONSE | DEFA1     |
| GO_INNATE_IMMUNE_RESPONSE | DEFA1B    |
| GO_INNATE_IMMUNE_RESPONSE | DEFA3     |
| GO_INNATE_IMMUNE_RESPONSE | DEFA4     |
| GO_INNATE_IMMUNE_RESPONSE | DEFA5     |
| GO_INNATE_IMMUNE_RESPONSE | DEFA6     |
| GO_INNATE_IMMUNE_RESPONSE | DEFB1     |
| GO_INNATE_IMMUNE_RESPONSE | DEFB103A  |
| GO_INNATE_IMMUNE_RESPONSE | DEFB103B  |
| GO_INNATE_IMMUNE_RESPONSE | DEFB104A  |
| GO_INNATE_IMMUNE_RESPONSE | DEFB104B  |
| GO_INNATE_IMMUNE_RESPONSE | DEFB105A  |
| GO_INNATE_IMMUNE_RESPONSE | DEFB105B  |
| GO_INNATE_IMMUNE_RESPONSE | DEFB106A  |
| GO_INNATE_IMMUNE_RESPONSE | DEFB106B  |
| GO_INNATE_IMMUNE_RESPONSE | DEFB108B  |
| GO_INNATE_IMMUNE_RESPONSE | DEFB108P1 |
| GO_INNATE_IMMUNE_RESPONSE | DEFB110   |
| GO_INNATE_IMMUNE_RESPONSE | DEFB112   |
| GO_INNATE_IMMUNE_RESPONSE | DEFB115   |
| GO_INNATE_IMMUNE_RESPONSE | DEFB116   |
| GO_INNATE_IMMUNE_RESPONSE | DEFB118   |
| GO_INNATE_IMMUNE_RESPONSE | DEFB119   |
| GO_INNATE_IMMUNE_RESPONSE | DEFB121   |
| GO_INNATE_IMMUNE_RESPONSE | DEFB123   |
| GO_INNATE_IMMUNE_RESPONSE | DEFB124   |
| GO_INNATE_IMMUNE_RESPONSE | DEFB125   |
| GO_INNATE_IMMUNE_RESPONSE | DEFB126   |
| GO_INNATE_IMMUNE_RESPONSE | DEFB127   |
| GO_INNATE_IMMUNE_RESPONSE | DEFB128   |
| GO_INNATE_IMMUNE_RESPONSE | DEFB129   |
| GO_INNATE_IMMUNE_RESPONSE | DEFB131   |
| GO_INNATE_IMMUNE_RESPONSE | DEFB132   |
| GO_INNATE_IMMUNE_RESPONSE | DEFB133   |
| GO_INNATE_IMMUNE_RESPONSE | DEFB134   |
| GO_INNATE_IMMUNE_RESPONSE | DEFB135   |
| GO_INNATE_IMMUNE_RESPONSE | DEFB4A    |
| GO_INNATE_IMMUNE_RESPONSE | DHX58     |
| GO_INNATE_IMMUNE_RESPONSE | DMBT1     |
| GO_INNATE_IMMUNE_RESPONSE | DNAJA3    |
| GO_INNATE_IMMUNE_RESPONSE | ECSIT     |
| GO_INNATE_IMMUNE_RESPONSE | EDN1      |

|                           |           |
|---------------------------|-----------|
| GO_INNATE_IMMUNE_RESPONSE | EGR1      |
| GO_INNATE_IMMUNE_RESPONSE | EIF2AK2   |
| GO_INNATE_IMMUNE_RESPONSE | ELF4      |
| GO_INNATE_IMMUNE_RESPONSE | EPRS      |
| GO_INNATE_IMMUNE_RESPONSE | F12       |
| GO_INNATE_IMMUNE_RESPONSE | F2RL1     |
| GO_INNATE_IMMUNE_RESPONSE | FADD      |
| GO_INNATE_IMMUNE_RESPONSE | FAM105B   |
| GO_INNATE_IMMUNE_RESPONSE | FAU       |
| GO_INNATE_IMMUNE_RESPONSE | FBXO9     |
| GO_INNATE_IMMUNE_RESPONSE | FCER1G    |
| GO_INNATE_IMMUNE_RESPONSE | FCGR1A    |
| GO_INNATE_IMMUNE_RESPONSE | FCGR1B    |
| GO_INNATE_IMMUNE_RESPONSE | FCN1      |
| GO_INNATE_IMMUNE_RESPONSE | FCN2      |
| GO_INNATE_IMMUNE_RESPONSE | FCN3      |
| GO_INNATE_IMMUNE_RESPONSE | FER       |
| GO_INNATE_IMMUNE_RESPONSE | FES       |
| GO_INNATE_IMMUNE_RESPONSE | FGA       |
| GO_INNATE_IMMUNE_RESPONSE | FGB       |
| GO_INNATE_IMMUNE_RESPONSE | FGR       |
| GO_INNATE_IMMUNE_RESPONSE | FRK       |
| GO_INNATE_IMMUNE_RESPONSE | FYN       |
| GO_INNATE_IMMUNE_RESPONSE | GAPDH     |
| GO_INNATE_IMMUNE_RESPONSE | GATA3     |
| GO_INNATE_IMMUNE_RESPONSE | GBP1      |
| GO_INNATE_IMMUNE_RESPONSE | GBP2      |
| GO_INNATE_IMMUNE_RESPONSE | GBP5      |
| GO_INNATE_IMMUNE_RESPONSE | GBP6      |
| GO_INNATE_IMMUNE_RESPONSE | GCH1      |
| GO_INNATE_IMMUNE_RESPONSE | GPBR      |
| GO_INNATE_IMMUNE_RESPONSE | GSDMD     |
| GO_INNATE_IMMUNE_RESPONSE | GZMB      |
| GO_INNATE_IMMUNE_RESPONSE | GZMM      |
| GO_INNATE_IMMUNE_RESPONSE | H2BFS     |
| GO_INNATE_IMMUNE_RESPONSE | HAVCR2    |
| GO_INNATE_IMMUNE_RESPONSE | HCK       |
| GO_INNATE_IMMUNE_RESPONSE | HERC5     |
| GO_INNATE_IMMUNE_RESPONSE | HIST1H2BC |
| GO_INNATE_IMMUNE_RESPONSE | HIST1H2BE |
| GO_INNATE_IMMUNE_RESPONSE | HIST1H2BF |
| GO_INNATE_IMMUNE_RESPONSE | HIST1H2BG |
| GO_INNATE_IMMUNE_RESPONSE | HIST1H2BI |
| GO_INNATE_IMMUNE_RESPONSE | HIST1H2BJ |
| GO_INNATE_IMMUNE_RESPONSE | HIST1H2BK |
| GO_INNATE_IMMUNE_RESPONSE | HIST2H2BE |
| GO_INNATE_IMMUNE_RESPONSE | HLA-A     |

|                           |          |
|---------------------------|----------|
| GO_INNATE_IMMUNE_RESPONSE | HLA-B    |
| GO_INNATE_IMMUNE_RESPONSE | HLA-C    |
| GO_INNATE_IMMUNE_RESPONSE | HLA-DPA1 |
| GO_INNATE_IMMUNE_RESPONSE | HLA-DPB1 |
| GO_INNATE_IMMUNE_RESPONSE | HLA-DQA1 |
| GO_INNATE_IMMUNE_RESPONSE | HLA-DQA2 |
| GO_INNATE_IMMUNE_RESPONSE | HLA-DQB1 |
| GO_INNATE_IMMUNE_RESPONSE | HLA-DQB2 |
| GO_INNATE_IMMUNE_RESPONSE | HLA-DRA  |
| GO_INNATE_IMMUNE_RESPONSE | HLA-DRB1 |
| GO_INNATE_IMMUNE_RESPONSE | HLA-DRB3 |
| GO_INNATE_IMMUNE_RESPONSE | HLA-DRB4 |
| GO_INNATE_IMMUNE_RESPONSE | HLA-DRB5 |
| GO_INNATE_IMMUNE_RESPONSE | HLA-E    |
| GO_INNATE_IMMUNE_RESPONSE | HLA-F    |
| GO_INNATE_IMMUNE_RESPONSE | HLA-G    |
| GO_INNATE_IMMUNE_RESPONSE | HLA-H    |
| GO_INNATE_IMMUNE_RESPONSE | HMGB1    |
| GO_INNATE_IMMUNE_RESPONSE | HMGB2    |
| GO_INNATE_IMMUNE_RESPONSE | HMGB3    |
| GO_INNATE_IMMUNE_RESPONSE | ICAM1    |
| GO_INNATE_IMMUNE_RESPONSE | IFI16    |
| GO_INNATE_IMMUNE_RESPONSE | IFI27    |
| GO_INNATE_IMMUNE_RESPONSE | IFI30    |
| GO_INNATE_IMMUNE_RESPONSE | IFI35    |
| GO_INNATE_IMMUNE_RESPONSE | IFI6     |
| GO_INNATE_IMMUNE_RESPONSE | IFIH1    |
| GO_INNATE_IMMUNE_RESPONSE | IFIT1    |
| GO_INNATE_IMMUNE_RESPONSE | IFIT2    |
| GO_INNATE_IMMUNE_RESPONSE | IFIT3    |
| GO_INNATE_IMMUNE_RESPONSE | IFIT5    |
| GO_INNATE_IMMUNE_RESPONSE | IFITM1   |
| GO_INNATE_IMMUNE_RESPONSE | IFITM2   |
| GO_INNATE_IMMUNE_RESPONSE | IFITM3   |
| GO_INNATE_IMMUNE_RESPONSE | IFNA1    |
| GO_INNATE_IMMUNE_RESPONSE | IFNA10   |
| GO_INNATE_IMMUNE_RESPONSE | IFNA13   |
| GO_INNATE_IMMUNE_RESPONSE | IFNA14   |
| GO_INNATE_IMMUNE_RESPONSE | IFNA16   |
| GO_INNATE_IMMUNE_RESPONSE | IFNA17   |
| GO_INNATE_IMMUNE_RESPONSE | IFNA2    |
| GO_INNATE_IMMUNE_RESPONSE | IFNA21   |
| GO_INNATE_IMMUNE_RESPONSE | IFNA4    |
| GO_INNATE_IMMUNE_RESPONSE | IFNA5    |
| GO_INNATE_IMMUNE_RESPONSE | IFNA6    |
| GO_INNATE_IMMUNE_RESPONSE | IFNA7    |
| GO_INNATE_IMMUNE_RESPONSE | IFNA8    |

|                           |             |
|---------------------------|-------------|
| GO_INNATE_IMMUNE_RESPONSE | IFNAR1      |
| GO_INNATE_IMMUNE_RESPONSE | IFNAR2      |
| GO_INNATE_IMMUNE_RESPONSE | IFNB1       |
| GO_INNATE_IMMUNE_RESPONSE | IFNE        |
| GO_INNATE_IMMUNE_RESPONSE | IFNG        |
| GO_INNATE_IMMUNE_RESPONSE | IFNGR1      |
| GO_INNATE_IMMUNE_RESPONSE | IFNGR2      |
| GO_INNATE_IMMUNE_RESPONSE | IFNW1       |
| GO_INNATE_IMMUNE_RESPONSE | IGHA1       |
| GO_INNATE_IMMUNE_RESPONSE | IGHA2       |
| GO_INNATE_IMMUNE_RESPONSE | IGHD        |
| GO_INNATE_IMMUNE_RESPONSE | IGHE        |
| GO_INNATE_IMMUNE_RESPONSE | IGHG1       |
| GO_INNATE_IMMUNE_RESPONSE | IGHG2       |
| GO_INNATE_IMMUNE_RESPONSE | IGHG3       |
| GO_INNATE_IMMUNE_RESPONSE | IGHG4       |
| GO_INNATE_IMMUNE_RESPONSE | IGHM        |
| GO_INNATE_IMMUNE_RESPONSE | IGHV1OR21-1 |
| GO_INNATE_IMMUNE_RESPONSE | IGHV3-23    |
| GO_INNATE_IMMUNE_RESPONSE | IGHV4OR15-8 |
| GO_INNATE_IMMUNE_RESPONSE | IGJ         |
| GO_INNATE_IMMUNE_RESPONSE | IGKC        |
| GO_INNATE_IMMUNE_RESPONSE | IGLC1       |
| GO_INNATE_IMMUNE_RESPONSE | IGLC2       |
| GO_INNATE_IMMUNE_RESPONSE | IGLC3       |
| GO_INNATE_IMMUNE_RESPONSE | IGLC6       |
| GO_INNATE_IMMUNE_RESPONSE | IGLC7       |
| GO_INNATE_IMMUNE_RESPONSE | IGLL1       |
| GO_INNATE_IMMUNE_RESPONSE | IGLL5       |
| GO_INNATE_IMMUNE_RESPONSE | IKBKB       |
| GO_INNATE_IMMUNE_RESPONSE | IKBKE       |
| GO_INNATE_IMMUNE_RESPONSE | IKBKG       |
| GO_INNATE_IMMUNE_RESPONSE | IL12B       |
| GO_INNATE_IMMUNE_RESPONSE | IL12RB1     |
| GO_INNATE_IMMUNE_RESPONSE | IL1RAP      |
| GO_INNATE_IMMUNE_RESPONSE | IL1RL2      |
| GO_INNATE_IMMUNE_RESPONSE | IL23A       |
| GO_INNATE_IMMUNE_RESPONSE | IL23R       |
| GO_INNATE_IMMUNE_RESPONSE | IL27        |
| GO_INNATE_IMMUNE_RESPONSE | IL28A       |
| GO_INNATE_IMMUNE_RESPONSE | IL28B       |
| GO_INNATE_IMMUNE_RESPONSE | IL28RA      |
| GO_INNATE_IMMUNE_RESPONSE | IL29        |
| GO_INNATE_IMMUNE_RESPONSE | IL34        |
| GO_INNATE_IMMUNE_RESPONSE | IL36A       |
| GO_INNATE_IMMUNE_RESPONSE | IL36B       |
| GO_INNATE_IMMUNE_RESPONSE | IL36G       |

|                           |             |
|---------------------------|-------------|
| GO_INNATE_IMMUNE_RESPONSE | IL36RN      |
| GO_INNATE_IMMUNE_RESPONSE | IL4         |
| GO_INNATE_IMMUNE_RESPONSE | IP6K2       |
| GO_INNATE_IMMUNE_RESPONSE | IPO7        |
| GO_INNATE_IMMUNE_RESPONSE | IRAK1       |
| GO_INNATE_IMMUNE_RESPONSE | IRAK4       |
| GO_INNATE_IMMUNE_RESPONSE | IRF1        |
| GO_INNATE_IMMUNE_RESPONSE | IRF2        |
| GO_INNATE_IMMUNE_RESPONSE | IRF3        |
| GO_INNATE_IMMUNE_RESPONSE | IRF4        |
| GO_INNATE_IMMUNE_RESPONSE | IRF5        |
| GO_INNATE_IMMUNE_RESPONSE | IRF6        |
| GO_INNATE_IMMUNE_RESPONSE | IRF7        |
| GO_INNATE_IMMUNE_RESPONSE | IRF8        |
| GO_INNATE_IMMUNE_RESPONSE | IRF9        |
| GO_INNATE_IMMUNE_RESPONSE | IRG1        |
| GO_INNATE_IMMUNE_RESPONSE | IRGM        |
| GO_INNATE_IMMUNE_RESPONSE | ISG15       |
| GO_INNATE_IMMUNE_RESPONSE | ISG20       |
| GO_INNATE_IMMUNE_RESPONSE | ITCH        |
| GO_INNATE_IMMUNE_RESPONSE | ITK         |
| GO_INNATE_IMMUNE_RESPONSE | JAK1        |
| GO_INNATE_IMMUNE_RESPONSE | JAK2        |
| GO_INNATE_IMMUNE_RESPONSE | JAK3        |
| GO_INNATE_IMMUNE_RESPONSE | KIR2DS1     |
| GO_INNATE_IMMUNE_RESPONSE | KIR2DS2     |
| GO_INNATE_IMMUNE_RESPONSE | KIR2DS4     |
| GO_INNATE_IMMUNE_RESPONSE | KIR2DS5     |
| GO_INNATE_IMMUNE_RESPONSE | KIR3DL1     |
| GO_INNATE_IMMUNE_RESPONSE | KIR3DS1     |
| GO_INNATE_IMMUNE_RESPONSE | KLRC2       |
| GO_INNATE_IMMUNE_RESPONSE | KLRC4-KLRK1 |
| GO_INNATE_IMMUNE_RESPONSE | KLRD1       |
| GO_INNATE_IMMUNE_RESPONSE | KLRF2       |
| GO_INNATE_IMMUNE_RESPONSE | KLRG1       |
| GO_INNATE_IMMUNE_RESPONSE | KLRK1       |
| GO_INNATE_IMMUNE_RESPONSE | KRT1        |
| GO_INNATE_IMMUNE_RESPONSE | KRT16       |
| GO_INNATE_IMMUNE_RESPONSE | KYNU        |
| GO_INNATE_IMMUNE_RESPONSE | LBP         |
| GO_INNATE_IMMUNE_RESPONSE | LCK         |
| GO_INNATE_IMMUNE_RESPONSE | LCN2        |
| GO_INNATE_IMMUNE_RESPONSE | LGALS3      |
| GO_INNATE_IMMUNE_RESPONSE | LGALS9      |
| GO_INNATE_IMMUNE_RESPONSE | LGR4        |
| GO_INNATE_IMMUNE_RESPONSE | LILRA5      |
| GO_INNATE_IMMUNE_RESPONSE | LRRC33      |

|                           |        |
|---------------------------|--------|
| GO_INNATE_IMMUNE_RESPONSE | LTF    |
| GO_INNATE_IMMUNE_RESPONSE | LY86   |
| GO_INNATE_IMMUNE_RESPONSE | LY9    |
| GO_INNATE_IMMUNE_RESPONSE | LY96   |
| GO_INNATE_IMMUNE_RESPONSE | LYN    |
| GO_INNATE_IMMUNE_RESPONSE | LYST   |
| GO_INNATE_IMMUNE_RESPONSE | MALT1  |
| GO_INNATE_IMMUNE_RESPONSE | MAP3K5 |
| GO_INNATE_IMMUNE_RESPONSE | MAP4K2 |
| GO_INNATE_IMMUNE_RESPONSE | MARCO  |
| GO_INNATE_IMMUNE_RESPONSE | MASP1  |
| GO_INNATE_IMMUNE_RESPONSE | MASP2  |
| GO_INNATE_IMMUNE_RESPONSE | MATK   |
| GO_INNATE_IMMUNE_RESPONSE | MAVS   |
| GO_INNATE_IMMUNE_RESPONSE | MB21D1 |
| GO_INNATE_IMMUNE_RESPONSE | MBL2   |
| GO_INNATE_IMMUNE_RESPONSE | MEFV   |
| GO_INNATE_IMMUNE_RESPONSE | MICA   |
| GO_INNATE_IMMUNE_RESPONSE | MICB   |
| GO_INNATE_IMMUNE_RESPONSE | MID1   |
| GO_INNATE_IMMUNE_RESPONSE | MID2   |
| GO_INNATE_IMMUNE_RESPONSE | MIF    |
| GO_INNATE_IMMUNE_RESPONSE | MR1    |
| GO_INNATE_IMMUNE_RESPONSE | MRC1   |
| GO_INNATE_IMMUNE_RESPONSE | MST1R  |
| GO_INNATE_IMMUNE_RESPONSE | MT2A   |
| GO_INNATE_IMMUNE_RESPONSE | MX1    |
| GO_INNATE_IMMUNE_RESPONSE | MX2    |
| GO_INNATE_IMMUNE_RESPONSE | MYD88  |
| GO_INNATE_IMMUNE_RESPONSE | NAIP   |
| GO_INNATE_IMMUNE_RESPONSE | NCAM1  |
| GO_INNATE_IMMUNE_RESPONSE | NCF1   |
| GO_INNATE_IMMUNE_RESPONSE | NCF2   |
| GO_INNATE_IMMUNE_RESPONSE | NCR2   |
| GO_INNATE_IMMUNE_RESPONSE | NFKB1  |
| GO_INNATE_IMMUNE_RESPONSE | NFKB2  |
| GO_INNATE_IMMUNE_RESPONSE | NLRC4  |
| GO_INNATE_IMMUNE_RESPONSE | NLRC5  |
| GO_INNATE_IMMUNE_RESPONSE | NLRP1  |
| GO_INNATE_IMMUNE_RESPONSE | NLRP10 |
| GO_INNATE_IMMUNE_RESPONSE | NLRP2  |
| GO_INNATE_IMMUNE_RESPONSE | NLRP2P |
| GO_INNATE_IMMUNE_RESPONSE | NLRP3  |
| GO_INNATE_IMMUNE_RESPONSE | NLRP6  |
| GO_INNATE_IMMUNE_RESPONSE | NLRX1  |
| GO_INNATE_IMMUNE_RESPONSE | NOD1   |
| GO_INNATE_IMMUNE_RESPONSE | NOD2   |

|                           |          |
|---------------------------|----------|
| GO_INNATE_IMMUNE_RESPONSE | NOS2     |
| GO_INNATE_IMMUNE_RESPONSE | NPY      |
| GO_INNATE_IMMUNE_RESPONSE | NR1H4    |
| GO_INNATE_IMMUNE_RESPONSE | NUB1     |
| GO_INNATE_IMMUNE_RESPONSE | OAS1     |
| GO_INNATE_IMMUNE_RESPONSE | OAS2     |
| GO_INNATE_IMMUNE_RESPONSE | OAS3     |
| GO_INNATE_IMMUNE_RESPONSE | OASL     |
| GO_INNATE_IMMUNE_RESPONSE | PADI4    |
| GO_INNATE_IMMUNE_RESPONSE | PCBP2    |
| GO_INNATE_IMMUNE_RESPONSE | PGLYRP1  |
| GO_INNATE_IMMUNE_RESPONSE | PGLYRP2  |
| GO_INNATE_IMMUNE_RESPONSE | PGLYRP3  |
| GO_INNATE_IMMUNE_RESPONSE | PGLYRP4  |
| GO_INNATE_IMMUNE_RESPONSE | PIK3CD   |
| GO_INNATE_IMMUNE_RESPONSE | PIK3CG   |
| GO_INNATE_IMMUNE_RESPONSE | PLA2G1B  |
| GO_INNATE_IMMUNE_RESPONSE | PML      |
| GO_INNATE_IMMUNE_RESPONSE | POLR3A   |
| GO_INNATE_IMMUNE_RESPONSE | POLR3B   |
| GO_INNATE_IMMUNE_RESPONSE | POLR3C   |
| GO_INNATE_IMMUNE_RESPONSE | POLR3D   |
| GO_INNATE_IMMUNE_RESPONSE | POLR3E   |
| GO_INNATE_IMMUNE_RESPONSE | POLR3F   |
| GO_INNATE_IMMUNE_RESPONSE | POLR3G   |
| GO_INNATE_IMMUNE_RESPONSE | POLR3H   |
| GO_INNATE_IMMUNE_RESPONSE | POLR3K   |
| GO_INNATE_IMMUNE_RESPONSE | PPARG    |
| GO_INNATE_IMMUNE_RESPONSE | PPP1R14B |
| GO_INNATE_IMMUNE_RESPONSE | PRDX1    |
| GO_INNATE_IMMUNE_RESPONSE | PRKCD    |
| GO_INNATE_IMMUNE_RESPONSE | PRKD1    |
| GO_INNATE_IMMUNE_RESPONSE | PSMB8    |
| GO_INNATE_IMMUNE_RESPONSE | PSTPIP1  |
| GO_INNATE_IMMUNE_RESPONSE | PTAFR    |
| GO_INNATE_IMMUNE_RESPONSE | PTK2     |
| GO_INNATE_IMMUNE_RESPONSE | PTK2B    |
| GO_INNATE_IMMUNE_RESPONSE | PTK6     |
| GO_INNATE_IMMUNE_RESPONSE | PTPN6    |
| GO_INNATE_IMMUNE_RESPONSE | PTX3     |
| GO_INNATE_IMMUNE_RESPONSE | PYCARD   |
| GO_INNATE_IMMUNE_RESPONSE | PYDC1    |
| GO_INNATE_IMMUNE_RESPONSE | PYDC2    |
| GO_INNATE_IMMUNE_RESPONSE | RAB27A   |
| GO_INNATE_IMMUNE_RESPONSE | RAET1E   |
| GO_INNATE_IMMUNE_RESPONSE | RAET1G   |
| GO_INNATE_IMMUNE_RESPONSE | RAET1L   |

|                           |          |
|---------------------------|----------|
| GO_INNATE_IMMUNE_RESPONSE | REL      |
| GO_INNATE_IMMUNE_RESPONSE | RELB     |
| GO_INNATE_IMMUNE_RESPONSE | RIPK2    |
| GO_INNATE_IMMUNE_RESPONSE | RNASE3   |
| GO_INNATE_IMMUNE_RESPONSE | RNASE7   |
| GO_INNATE_IMMUNE_RESPONSE | RNASEL   |
| GO_INNATE_IMMUNE_RESPONSE | RNF135   |
| GO_INNATE_IMMUNE_RESPONSE | RPL13A   |
| GO_INNATE_IMMUNE_RESPONSE | RPL39    |
| GO_INNATE_IMMUNE_RESPONSE | RPS27A   |
| GO_INNATE_IMMUNE_RESPONSE | RSAD2    |
| GO_INNATE_IMMUNE_RESPONSE | S100A12  |
| GO_INNATE_IMMUNE_RESPONSE | S100A7   |
| GO_INNATE_IMMUNE_RESPONSE | S100A8   |
| GO_INNATE_IMMUNE_RESPONSE | S100A9   |
| GO_INNATE_IMMUNE_RESPONSE | S100B    |
| GO_INNATE_IMMUNE_RESPONSE | SAA1     |
| GO_INNATE_IMMUNE_RESPONSE | SAMHD1   |
| GO_INNATE_IMMUNE_RESPONSE | SARM1    |
| GO_INNATE_IMMUNE_RESPONSE | SEC14L1  |
| GO_INNATE_IMMUNE_RESPONSE | SEC61A1  |
| GO_INNATE_IMMUNE_RESPONSE | SEPX1    |
| GO_INNATE_IMMUNE_RESPONSE | SERINC3  |
| GO_INNATE_IMMUNE_RESPONSE | SERINC5  |
| GO_INNATE_IMMUNE_RESPONSE | SERPING1 |
| GO_INNATE_IMMUNE_RESPONSE | SFTPD    |
| GO_INNATE_IMMUNE_RESPONSE | SH2D1A   |
| GO_INNATE_IMMUNE_RESPONSE | SH2D1B   |
| GO_INNATE_IMMUNE_RESPONSE | SHMT2    |
| GO_INNATE_IMMUNE_RESPONSE | SIGLEC14 |
| GO_INNATE_IMMUNE_RESPONSE | SIGLEC15 |
| GO_INNATE_IMMUNE_RESPONSE | SIGLEC16 |
| GO_INNATE_IMMUNE_RESPONSE | SIRPB1   |
| GO_INNATE_IMMUNE_RESPONSE | SIRT2    |
| GO_INNATE_IMMUNE_RESPONSE | SLAMF1   |
| GO_INNATE_IMMUNE_RESPONSE | SLAMF6   |
| GO_INNATE_IMMUNE_RESPONSE | SLAMF7   |
| GO_INNATE_IMMUNE_RESPONSE | SLC11A1  |
| GO_INNATE_IMMUNE_RESPONSE | SLC26A6  |
| GO_INNATE_IMMUNE_RESPONSE | SLC30A8  |
| GO_INNATE_IMMUNE_RESPONSE | SLPI     |
| GO_INNATE_IMMUNE_RESPONSE | SNCA     |
| GO_INNATE_IMMUNE_RESPONSE | SP100    |
| GO_INNATE_IMMUNE_RESPONSE | SPON2    |
| GO_INNATE_IMMUNE_RESPONSE | SRC      |
| GO_INNATE_IMMUNE_RESPONSE | SRMS     |
| GO_INNATE_IMMUNE_RESPONSE | SRPK1    |



|                           |           |
|---------------------------|-----------|
| GO_INNATE_IMMUNE_RESPONSE | SRPK2     |
| GO_INNATE_IMMUNE_RESPONSE | SSC5D     |
| GO_INNATE_IMMUNE_RESPONSE | STAR      |
| GO_INNATE_IMMUNE_RESPONSE | STAT1     |
| GO_INNATE_IMMUNE_RESPONSE | STAT2     |
| GO_INNATE_IMMUNE_RESPONSE | STYK1     |
| GO_INNATE_IMMUNE_RESPONSE | SUSD4     |
| GO_INNATE_IMMUNE_RESPONSE | SYK       |
| GO_INNATE_IMMUNE_RESPONSE | SYNCRIP   |
| GO_INNATE_IMMUNE_RESPONSE | TAC1      |
| GO_INNATE_IMMUNE_RESPONSE | TBK1      |
| GO_INNATE_IMMUNE_RESPONSE | TBKBP1    |
| GO_INNATE_IMMUNE_RESPONSE | TDGF1     |
| GO_INNATE_IMMUNE_RESPONSE | TEC       |
| GO_INNATE_IMMUNE_RESPONSE | TGFB1     |
| GO_INNATE_IMMUNE_RESPONSE | TICAM1    |
| GO_INNATE_IMMUNE_RESPONSE | TICAM2    |
| GO_INNATE_IMMUNE_RESPONSE | TIRAP     |
| GO_INNATE_IMMUNE_RESPONSE | TLR1      |
| GO_INNATE_IMMUNE_RESPONSE | TLR10     |
| GO_INNATE_IMMUNE_RESPONSE | TLR2      |
| GO_INNATE_IMMUNE_RESPONSE | TLR3      |
| GO_INNATE_IMMUNE_RESPONSE | TLR4      |
| GO_INNATE_IMMUNE_RESPONSE | TLR5      |
| GO_INNATE_IMMUNE_RESPONSE | TLR6      |
| GO_INNATE_IMMUNE_RESPONSE | TLR7      |
| GO_INNATE_IMMUNE_RESPONSE | TLR8      |
| GO_INNATE_IMMUNE_RESPONSE | TLR9      |
| GO_INNATE_IMMUNE_RESPONSE | TMEM173   |
| GO_INNATE_IMMUNE_RESPONSE | TNFAIP8L2 |
| GO_INNATE_IMMUNE_RESPONSE | TNK1      |
| GO_INNATE_IMMUNE_RESPONSE | TNK2      |
| GO_INNATE_IMMUNE_RESPONSE | TOLLIP    |
| GO_INNATE_IMMUNE_RESPONSE | TRAF3     |
| GO_INNATE_IMMUNE_RESPONSE | TRDC      |
| GO_INNATE_IMMUNE_RESPONSE | TREM1     |
| GO_INNATE_IMMUNE_RESPONSE | TREM2     |
| GO_INNATE_IMMUNE_RESPONSE | TREML1    |
| GO_INNATE_IMMUNE_RESPONSE | TRIL      |
| GO_INNATE_IMMUNE_RESPONSE | TRIM10    |
| GO_INNATE_IMMUNE_RESPONSE | TRIM11    |
| GO_INNATE_IMMUNE_RESPONSE | TRIM13    |
| GO_INNATE_IMMUNE_RESPONSE | TRIM14    |
| GO_INNATE_IMMUNE_RESPONSE | TRIM15    |
| GO_INNATE_IMMUNE_RESPONSE | TRIM21    |
| GO_INNATE_IMMUNE_RESPONSE | TRIM22    |
| GO_INNATE_IMMUNE_RESPONSE | TRIM25    |

|                           |         |
|---------------------------|---------|
| GO_INNATE_IMMUNE_RESPONSE | TRIM26  |
| GO_INNATE_IMMUNE_RESPONSE | TRIM27  |
| GO_INNATE_IMMUNE_RESPONSE | TRIM28  |
| GO_INNATE_IMMUNE_RESPONSE | TRIM31  |
| GO_INNATE_IMMUNE_RESPONSE | TRIM32  |
| GO_INNATE_IMMUNE_RESPONSE | TRIM34  |
| GO_INNATE_IMMUNE_RESPONSE | TRIM35  |
| GO_INNATE_IMMUNE_RESPONSE | TRIM38  |
| GO_INNATE_IMMUNE_RESPONSE | TRIM4   |
| GO_INNATE_IMMUNE_RESPONSE | TRIM5   |
| GO_INNATE_IMMUNE_RESPONSE | TRIM56  |
| GO_INNATE_IMMUNE_RESPONSE | TRIM62  |
| GO_INNATE_IMMUNE_RESPONSE | TRIM68  |
| GO_INNATE_IMMUNE_RESPONSE | TRIM8   |
| GO_INNATE_IMMUNE_RESPONSE | TUBB    |
| GO_INNATE_IMMUNE_RESPONSE | TUBB4B  |
| GO_INNATE_IMMUNE_RESPONSE | TYK2    |
| GO_INNATE_IMMUNE_RESPONSE | TYROBP  |
| GO_INNATE_IMMUNE_RESPONSE | UBA52   |
| GO_INNATE_IMMUNE_RESPONSE | UBB     |
| GO_INNATE_IMMUNE_RESPONSE | UBC     |
| GO_INNATE_IMMUNE_RESPONSE | UBD     |
| GO_INNATE_IMMUNE_RESPONSE | ULBP1   |
| GO_INNATE_IMMUNE_RESPONSE | ULBP2   |
| GO_INNATE_IMMUNE_RESPONSE | ULBP3   |
| GO_INNATE_IMMUNE_RESPONSE | UNC13D  |
| GO_INNATE_IMMUNE_RESPONSE | UNC93B1 |
| GO_INNATE_IMMUNE_RESPONSE | VAMP2   |
| GO_INNATE_IMMUNE_RESPONSE | VAMP7   |
| GO_INNATE_IMMUNE_RESPONSE | VCAM1   |
| GO_INNATE_IMMUNE_RESPONSE | VIP     |
| GO_INNATE_IMMUNE_RESPONSE | VNN1    |
| GO_INNATE_IMMUNE_RESPONSE | VSIG4   |
| GO_INNATE_IMMUNE_RESPONSE | WNT5A   |
| GO_INNATE_IMMUNE_RESPONSE | XAF1    |
| GO_INNATE_IMMUNE_RESPONSE | XCL1    |
| GO_INNATE_IMMUNE_RESPONSE | XCL2    |
| GO_INNATE_IMMUNE_RESPONSE | YES1    |
| GO_INNATE_IMMUNE_RESPONSE | ZAP70   |
| GO_INNATE_IMMUNE_RESPONSE | ZBP1    |
| GO_INNATE_IMMUNE_RESPONSE | ZBTB1   |
| GO_INNATE_IMMUNE_RESPONSE | ZC3HAV1 |
