# Supplementary material for: Human iPSC modeling reveals mutation-specific responses to gene therapy in Best disease
Source: bioRxiv or medRxiv preprint supplement (doi:10.1101/796581), 2020-01-31
Supplement: Supplementary file [file media-3.pdf]

## SI Data File C: Ranked off-target sites for sgRNAs used in this study

**Off-target for A146K sgRNA**

| Sequence             | PAM | Score       | Gene            | Chromosome | Strand | Position  | Mismatches | On-target |
|----------------------|-----|-------------|-----------------|------------|--------|-----------|------------|-----------|
| CTGCGGTGCTGACGCTGCGC | AGG | 5.146703297 | ENSG00000167995 | chr11      | -1     | 61955893  | 2          | FALSE     |
| CCTGTGTCTGACGCTGCGC  | GGG | 1.442307692 |                 | chr20      | -1     | 50246956  | 4          | FALSE     |
| CTTTGTTCATGACGCTGCGC | AGG | 0.896991699 | ENSG00000048471 | chr16      | -1     | 12524752  | 3          | FALSE     |
| CTTTGTGCCGACGTTGCGC  | GGG | 0.762558049 |                 | chr4       | 1      | 54658402  | 3          | FALSE     |
| CCGCGGTGCTGACGCTGCTC | AGG | 0.611313191 | ENSG00000090316 | chr4       | -1     | 1309855   | 4          | FALSE     |
| CTGTAGTGCAGAGGCTGCGC | TGG | 0.582322973 |                 | chr2       | 1      | 47237604  | 4          | FALSE     |
| TTTTGGTGCTGAAGCTGCCC | AAG | 0.54756383  |                 | chr8       | -1     | 101982967 | 3          | FALSE     |
| CCATGGGGCTGGCGCTGCGC | AAG | 0.543948597 | ENSG00000266074 | chr17      | 1      | 81461477  | 4          | FALSE     |
| CCCTGCTGCTGGCGCTGCGC | TGG | 0.477428291 | ENSG00000170128 | chr1       | 1      | 200873893 | 4          | FALSE     |
| CTCTGCTGCCGCCGCTGCGC | GAG | 0.431824255 | ENSG00000143502 | chr1       | 1      | 223364152 | 4          | FALSE     |
| CGTTGGTGGCGACGCTGCCC | CGG | 0.348889334 | ENSG00000204666 | chr19      | 1      | 50050818  | 4          | FALSE     |
| CTGCGGTGCGGACGCTGGGC | CAG | 0.346494543 | ENSG00000167608 | chr19      | -1     | 54164551  | 4          | FALSE     |
| CTCCGGTCTGATGCTGCGG  | GAG | 0.343553885 | ENSG00000138311 | chr10      | -1     | 62374409  | 4          | FALSE     |
| CTTTGGTGACAGCTGCCCC  | GAG | 0.332111303 |                 | chr10      | 1      | 15762893  | 3          | FALSE     |
| CTTTCAGGCTTACGCTGCGC | GGG | 0.330770661 | ENSG00000273079 | chr12      | 1      | 13563279  | 4          | FALSE     |
| CTGTGGTCTGCCGCTGCTC  | TGG | 0.30076609  | ENSG00000073060 | chr12      | -1     | 124787421 | 4          | FALSE     |
| CTTTGGAGAACACGCTGCGC | TAG | 0.293406436 |                 | chr5       | -1     | 14191003  | 4          | FALSE     |
| CTGTGGTCTGATGCTGGGC  | CAG | 0.287073004 |                 | chr3       | 1      | 139829324 | 3          | FALSE     |
| CCTTGGTCCGACGCTGCAG  | AAG | 0.271059097 | ENSG00000112782 | chr6       | -1     | 46014623  | 4          | FALSE     |
| CTTTGTTGGAGCCGCTGCGC | GGG | 0.241590158 | ENSG00000111058 | chr12      | -1     | 80937330  | 4          | FALSE     |
| CAGTGGTGGTACGCTGAGC  | AGG | 0.237659842 |                 | chr2       | -1     | 23667620  | 4          | FALSE     |
| ATTTCTGCTGACGCTGGGC  | AGG | 0.233392956 |                 | chr9       | -1     | 35982279  | 4          | FALSE     |
| GTTTGGAGCTGCTGCTGCGC | AGG | 0.228221001 | ENSG00000132382 | chr17      | 1      | 4544546   | 4          | FALSE     |
| TTTTGATGCTGAGGCTGCGG | CGG | 0.221542787 |                 | chr7       | 1      | 36242063  | 4          | FALSE     |
| GTCTGGTCTGACGATCCGC  | GAG | 0.21965615  | ENSG00000108465 | chr17      | 1      | 47973578  | 4          | FALSE     |
| CTGTGGTGC GGAAGCTGCC | AGG | 0.215507231 |                 | chr5       | -1     | 140677455 | 4          | FALSE     |
| CCTGGGGGCTGACGCGGCGC | CGG | 0.214619615 | ENSG00000117322 | chr1       | -1     | 207454238 | 4          | FALSE     |
| CCTGCTGCTGATGCTGCGG  | AGG | 0.213387838 |                 | chr15      | -1     | 74832344  | 4          | FALSE     |
| CTTCAGTGCTTACGCTGTGC | CAG | 0.205041667 |                 | chr10      | -1     | 46442968  | 4          | FALSE     |
| CCTGGGTGCTGGCGCTGGGC | TGG | 0.198577457 |                 | chr17      | 1      | 39635341  | 4          | FALSE     |
| CCTTGGCGCTGATGCTTCGC | AGG | 0.19810534  | ENSG00000131759 | chr17      | -1     | 40355405  | 4          | FALSE     |
| CTTTGGTGGGGCCGCTGCGG | TGG | 0.191301516 | ENSG00000279685 | chr17      | 1      | 45897419  | 4          | FALSE     |
| CTGTGATGCTGGCGCTGCC  | GGG | 0.186075653 |                 | chr2       | 1      | 144508184 | 4          | FALSE     |
| CTTGGGCGCTGAGGCTTCGC | AGG | 0.185914242 |                 | chr4       | 1      | 1168570   | 4          | FALSE     |
| CTGTTGTGCTGACGATGCTC | TGG | 0.175464972 |                 | chr18      | 1      | 2857771   | 4          | FALSE     |
| CTTTGCTACTGTGGCTGCGC | AAG | 0.174629839 |                 | chr4       | 1      | 71438039  | 4          | FALSE     |
| CTTTGGGGCTGACGCAGCGG | AGG | 0.171411114 | ENSG00000072952 | chr11      | -1     | 10652138  | 3          | FALSE     |
| ATGTGGTCTGAGGCTGAGC  | AAG | 0.163459897 |                 | chr11      | -1     | 109641742 | 4          | FALSE     |
| CCTGGGTGCTGAGGCTGGGC | CAG | 0.158025    | ENSG00000139880 | chr14      | 1      | 23055784  | 4          | FALSE     |
| GTTTGGGGCTGACGTTGCTC | CAG | 0.127583658 |                 | chr19      | -1     | 17997337  | 4          | FALSE     |
| CTGTGGGGCTGGCGCTGAGC | CGG | 0.125055252 | ENSG00000135100 | chr12      | -1     | 120999611 | 4          | FALSE     |
| TTTTGGTCTGACTCTGAGC  | AGG | 0.124133333 |                 | chr2       | -1     | 45393365  | 3          | FALSE     |
| GTTTGGTCTGCAGCTGCAC  | CGG | 0.122096565 | ENSG00000125457 | chr17      | -1     | 75266944  | 4          | FALSE     |
| CTCTGGAGCTGACGCTGGGG | GAG | 0.121791994 |                 | chr14      | -1     | 94370120  | 4          | FALSE     |
| CTCTGGAGCTGACGCTGGGG | GAG | 0.121791994 |                 | chr14      | -1     | 94361639  | 4          | FALSE     |
| TTTTGCTGCTGCCGCTGTGC | TGG | 0.1215445   |                 | chr5       | 1      | 179212942 | 4          | FALSE     |
| CATTGGTGCAGACTGCGG   | GGG | 0.120628554 |                 | chr4       | 1      | 8581829   | 4          | FALSE     |
| CTTTGGTCTGGCGCTGGGT  | GGG | 0.115238422 | ENSG00000258986 | chr14      | -1     | 104594792 | 3          | FALSE     |
| CCTTGGTCTGAGGGTGCAG  | AGG | 0.11344589  | ENSG00000052749 | chr10      | 1      | 97373604  | 4          | FALSE     |
| ATGTGGTCTGACTCTGCAC  | AGG | 0.106364551 |                 | chr13      | -1     | 51223383  | 4          | FALSE     |

Off-target for N296H sgRNA    Off-target for N296H sgRNA

| Sequence              | PAM | Score      | Gene       | Chromosome | Strand | Position     | Mismatches | On-target |
|-----------------------|-----|------------|------------|------------|--------|--------------|------------|-----------|
| CTTCATCATCTCCAAAGGGG  | AAG | 6.69014085 |            | chr9       |        | -1 90546396  | 2          | FALSE     |
| CAGCATGCTCTCCAAAGGGG  | AAG | 4.04915253 |            | chr18      |        | 1 37665117   | 2          | FALSE     |
| CATGCTCCTCTCCAAAGGGC  | AGG | 1.68216561 |            | chr5       |        | 1 172749869  | 3          | FALSE     |
| CATAATCATCTCCAAAGGGC  | TAG | 1.68216561 |            | chrX       |        | 1 79627241   | 3          | FALSE     |
| CACCCTCCTCCCAAAGGGG   | CAG | 1.56823077 |            | chr2       |        | 1 74347940   | 3          | FALSE     |
| GAATATCGTCTCCAAAGGGG  | TAG | 1.45752075 |            | chr4       |        | 1 164866636  | 4          | FALSE     |
| CATTATCCTACCCAAAGGGG  | AGG | 1.41367467 |            | chr5       |        | -1 37917393  | 3          | FALSE     |
| CGTCATCCTGTACAAAGGGG  | AGG | 1.39992    |            | chr13      |        | -1 32175536  | 3          | FALSE     |
| CTCCTTCCTTTCCAAAGGGG  | CAG | 1.38846679 | ENSG000001 | chr14      |        | -1 21405293  | 4          | FALSE     |
| ATACCTCCTCTCCAAAGGGG  | TAG | 1.35622587 |            | chr3       |        | 1 113192849  | 4          | FALSE     |
| CAGCATTCTCCCAAAGGGG   | CAG | 1.07110162 | ENSG000000 | chr17      |        | -1 48057103  | 3          | FALSE     |
| CAACAACCTCTCCAAAGGGA  | AGG | 1.05733942 |            | chr15      |        | -1 62599769  | 3          | FALSE     |
| CATCCTTCTACCAAAGGGG   | AAG | 1.01297257 |            | chr16      |        | -1 86594199  | 3          | FALSE     |
| AAAAATTCTCTCCAAAGGGG  | AAG | 0.97130481 |            | chr5       |        | 1 54721830   | 4          | FALSE     |
| CAGCGTGTCTCCAAAGGGG   | CAG | 0.95582585 |            | chr5       |        | 1 14191020   | 4          | FALSE     |
| GCTCCTCCACTCCAAAGGGG  | CAG | 0.94228896 |            | chr17      |        | 1 49558343   | 4          | FALSE     |
| AGTCATCATCTCCAAAGGGC  | AGG | 0.93431604 |            | chr5       |        | -1 10046165  | 4          | FALSE     |
| CTTCATTCTCTCCAAAGGAG  | TAG | 0.91448658 | ENSG000000 | chr11      |        | -1 75798251  | 3          | FALSE     |
| AGTCATCCTGTCCAAAGGGA  | AAG | 0.88271165 |            | chr18      |        | -1 51768352  | 4          | FALSE     |
| GATACTCCTCTCCAAAGGGC  | AAG | 0.87903107 |            | chr15      |        | 1 66408966   | 4          | FALSE     |
| CATTCTCTGCTCCAAAGGGG  | GAG | 0.87417169 |            | chr10      |        | -1 90779223  | 4          | FALSE     |
| GCACATCCTCTCCAAAGGGA  | AGG | 0.86672463 |            | chr9       |        | 1 88700535   | 4          | FALSE     |
| CTTAGTCCTCTCCAAAGGGC  | GAG | 0.84889286 |            | chr16      |        | -1 54391594  | 4          | FALSE     |
| TCTCATCTTCTACAAAGGGG  | GAG | 0.84673913 |            | chrX       |        | -1 149295005 | 4          | FALSE     |
| CATTTGCCTATCCAAAGGGG  | GAG | 0.80366106 |            | chr8       |        | 1 65982123   | 4          | FALSE     |
| CATCGTCTCTTCCAAAGGGG  | GGG | 0.79238308 | ENSG000001 | chr16      |        | -1 87956795  | 4          | FALSE     |
| CACCCTCCTTCCCAAAGGGG  | CAG | 0.79096733 |            | chr2       |        | 1 74347104   | 4          | FALSE     |
| CATTTTCCTAGCCAAAGGGG  | TAG | 0.78154064 | ENSG000001 | chr11      |        | -1 47109311  | 4          | FALSE     |
| CACAATCATCTACAAAGGGG  | CAG | 0.77498274 |            | chr13      |        | 1 60717346   | 4          | FALSE     |
| CTTTATCCTTTACAAAGGGG  | AAG | 0.75787923 |            | chr17      |        | 1 68574649   | 4          | FALSE     |
| CTTCCTCATCTCCAAAGGG   | AGG | 0.72569444 |            | chr8       |        | 1 140074446  | 4          | FALSE     |
| CTTCGTCCTCTCCAATGGGG  | AGG | 0.62967245 |            | chr2       |        | -1 136402449 | 3          | FALSE     |
| AAGCATCCTATCAAAGGGG   | AGG | 0.62914291 |            | chr20      |        | -1 58404478  | 4          | FALSE     |
| CTGCATCCTATCTAAAGGGG  | CAG | 0.61072897 |            | chr5       |        | -1 173795919 | 4          | FALSE     |
| TATCTTTCTCTCCAAAGGGT  | GGG | 0.60756838 |            | chr2       |        | -1 229408453 | 4          | FALSE     |
| CACCTTCTTCTCCAAAGGAG  | CAG | 0.60463217 |            | chr17      |        | 1 35998658   | 4          | FALSE     |
| TATCATATTCTCCAAAGGGC  | AAG | 0.60037822 |            | chr11      |        | 1 63668189   | 4          | FALSE     |
| GATCTATCTCTCCAAAGGGG  | AAG | 0.59598317 |            | chr18      |        | -1 57046457  | 4          | FALSE     |
| GATCACTTTTCCAAAGGGG   | AGG | 0.59204552 |            | chr12      |        | 1 83596582   | 4          | FALSE     |
| CACTATCCTGTCAAAGGGG   | AAG | 0.58779079 |            | chr12      |        | 1 79892649   | 4          | FALSE     |
| CCTCATCCTCTCAAAGGG    | CAG | 0.5719     |            | chr1       |        | -1 245981290 | 3          | FALSE     |
| CATCATCTTCCCAAAGGAG   | AAG | 0.56204315 | ENSG000000 | chr17      |        | 1 4960280    | 3          | FALSE     |
| GATAATGCTTTCAAAGGGG   | TAG | 0.56203204 |            | chr8       |        | -1 87976851  | 4          | FALSE     |
| CAACAAACTTTCAAAGGGG   | CAG | 0.55469015 |            | chr3       |        | 1 184027869  | 4          | FALSE     |
| CAACATCCTCTCAAAGGAA   | TGG | 0.55051556 |            | chr3       |        | 1 113407849  | 3          | FALSE     |
| CATGATGTTCTCCAAAGGGC  | TGG | 0.5425878  | ENSG000002 | chr3       |        | 1 15475283   | 4          | FALSE     |
| CAGCAGCACCTCCAAAGGGG  | TGG | 0.52998343 |            | chr20      |        | -1 24296403  | 4          | FALSE     |
| CCTCATCACCAACCAAAGGGG | AGG | 0.5275378  |            | chr16      |        | 1 31128217   | 4          | FALSE     |
| CATCAGATTGTCCAAAGGGG  | AAG | 0.52346882 |            | chr2       |        | 1 205279527  | 4          | FALSE     |
| CCTCAGCATCTCCAAAGGGA  | AGG | 0.51951752 | ENSG000001 | chr9       |        | -1 87707435  | 4          | FALSE     |

Off-target for R218C sgRNA

| Sequence              | PAM | Score       | Gene            | Chromosome | Strand | Position  | Mismatches | On-target |
|-----------------------|-----|-------------|-----------------|------------|--------|-----------|------------|-----------|
| GTGTCCACACTGAGTACGCA  | AGG | 19.6        | ENSG00000167995 | chr11      | -1     | 61957403  | 1          | FALSE     |
| ATGTCCACACTGAGTACACC  | TGG | 10.425      |                 | chr7       | 1      | 10314123  | 2          | FALSE     |
| GTGTGTAACACTGAGTACACA | AGG | 1.46807152  |                 | chr10      | -1     | 21984870  | 3          | FALSE     |
| ATGCACACAGTGAAGTACACA | GAG | 1.432778384 |                 | chr17      | -1     | 48247156  | 4          | FALSE     |
| GAAGCCAGACTGAGTACACA  | GAG | 1.422115385 |                 | chr20      | 1      | 48165409  | 4          | FALSE     |
| GTGTTCCACCTGAGTACACT  | TAG | 0.977970303 |                 | chr2       | 1      | 111459080 | 3          | FALSE     |
| GTGTTCCACCTGAGTACACT  | TAG | 0.977970303 |                 | chr2       | -1     | 87491157  | 3          | FALSE     |
| CTTCCACACTGAGCACACA   | GGG | 0.967381888 |                 | chr9       | 1      | 109316353 | 3          | FALSE     |
| ATTCCCACCTGAGTACACA   | TAG | 0.9132825   |                 | chr9       | 1      | 120468910 | 4          | FALSE     |
| GAATCCATACTGAGTACACT  | GAG | 0.877104566 |                 | chr7       | -1     | 115541230 | 4          | FALSE     |
| GTGGGGAGACTGAGTACACA  | CAG | 0.832166988 |                 | chr6       | 1      | 2149828   | 4          | FALSE     |
| GTCTCCAGGGTGAAGTACACA | CAG | 0.820192107 |                 | chr15      | -1     | 72867267  | 4          | FALSE     |
| GTGATTACAATGAGTACACA  | AAG | 0.803661058 |                 | chr6       | 1      | 131742399 | 4          | FALSE     |
| GCATGCACACTCAGTACACA  | CGG | 0.781996154 |                 | chr7       | -1     | 151819824 | 4          | FALSE     |
| ATGTCCAGAGTGAAGTAAACA | GAG | 0.682815709 |                 | chr4       | -1     | 121016770 | 4          | FALSE     |
| CTGGCCACACTGAGTCCACA  | GGG | 0.66020202  |                 | chr2       | 1      | 101414147 | 3          | FALSE     |
| GGCCCCACACTGAGTACAGA  | TAG | 0.611313191 |                 | chr7       | -1     | 134144846 | 4          | FALSE     |
| GTCTCCACTGGGTACACA    | GAG | 0.609590078 |                 | chr22      | 1      | 43615713  | 4          | FALSE     |
| CTGCCTACTCTGAGTACACA  | GAG | 0.565191389 |                 | chr5       | 1      | 144359039 | 4          | FALSE     |
| GTGTACTCTGTGAGTACACA  | TGG | 0.545509974 |                 | chr10      | -1     | 48556885  | 4          | FALSE     |
| GTGTACAGAATGAGTACAGA  | TGG | 0.524636897 |                 | chr4       | 1      | 121633689 | 4          | FALSE     |
| GAGTCCACACTGTGTACAGA  | GGG | 0.51816443  |                 | chr4       | -1     | 7581742   | 3          | FALSE     |
| TTTTCCACACTGATTACACA  | CAG | 0.51406372  | ENSG00000198131 | chr19      | -1     | 58261673  | 3          | FALSE     |
| GTCTCCTCACTGAGTACCCA  | GGG | 0.506643053 |                 | chr20      | -1     | 59381089  | 3          | FALSE     |
| CAGTCCAGACTGAGAACACA  | AAG | 0.50515873  |                 | chr2       | 1      | 30924911  | 4          | FALSE     |
| TGGTTCACACTGAGGACACA  | CAG | 0.489615385 |                 | chr2       | 1      | 1373795   | 4          | FALSE     |
| ATGAACACACTGAGCACACA  | TGG | 0.479773869 | ENSG00000231508 | chr10      | 1      | 97393296  | 4          | FALSE     |
| GTCACCCCACTGAGTAAACA  | GAG | 0.473672978 |                 | chr10      | 1      | 49351882  | 4          | FALSE     |
| GTGTTCCACTGTGTACAAA   | CAG | 0.446280347 |                 | chr3       | -1     | 168181081 | 3          | FALSE     |
| GTGTACAGACTGACTACACA  | CAG | 0.443035994 |                 | chr20      | -1     | 15444572  | 3          | FALSE     |
| GTTTGCACACAAAGTACACA  | CAG | 0.437971408 |                 | chr10      | 1      | 63488170  | 4          | FALSE     |
| GTGTACACAATGATTACACA  | AGG | 0.40803615  |                 | chr8       | 1      | 113125227 | 3          | FALSE     |
| CTGTCCAGGCTGTGTACACA  | CAG | 0.399231309 |                 | chr16      | -1     | 80654292  | 4          | FALSE     |
| CTCTCCACTGAGTAGACC    | TGG | 0.394359707 |                 | chr1       | -1     | 175504570 | 4          | FALSE     |
| GTTTCAACAGTGAAGTACACA | GGG | 0.390436322 |                 | chr5       | 1      | 179960628 | 4          | FALSE     |
| TTCTCCACTAAGTAAACA    | GGG | 0.38910025  |                 | chr2       | 1      | 34814827  | 4          | FALSE     |
| GTTTCCACAAGCAGTACACA  | GAG | 0.385757183 |                 | chr7       | -1     | 21421854  | 4          | FALSE     |
| GTCTCCATCCTGAGTACAGA  | GAG | 0.361528006 | ENSG00000151348 | chr11      | 1      | 44124841  | 4          | FALSE     |
| GTGTACAGGCTGTGTACACA  | AAG | 0.35845875  |                 | chr11      | -1     | 103603253 | 4          | FALSE     |
| GTGTGTTGCTGAGTACACA   | GAG | 0.347274102 |                 | chr16      | 1      | 10566772  | 4          | FALSE     |
| GTATCTTCACTGAGTACACT  | AGG | 0.33439929  |                 | chr5       | -1     | 39906309  | 4          | FALSE     |
| TTGTCCACAGAGCGTACACA  | GGG | 0.333991947 | ENSG00000197989 | chr1       | -1     | 28582390  | 4          | FALSE     |
| GTGACCACACTGGGCACACA  | TGG | 0.333435533 |                 | chr2       | 1      | 131536773 | 3          | FALSE     |
| GTGACCACACTGGGCACACA  | TGG | 0.333435533 |                 | chr2       | 1      | 131202725 | 3          | FALSE     |
| GTGACCACACTGGGCACACA  | TGG | 0.333435533 |                 | chr2       | -1     | 130136194 | 3          | FALSE     |
| GTGTATGCACAGAGTACACA  | CAG | 0.330770661 |                 | chr10      | -1     | 105461678 | 4          | FALSE     |
| GTGTACACTGTGTGTACACA  | GGG | 0.330140509 |                 | chr2       | 1      | 207287915 | 4          | FALSE     |
| GTATACACACTCGGTACACA  | CAG | 0.316975285 |                 | chr19      | -1     | 46319193  | 4          | FALSE     |
| CTCTACACACTGAGTCCACA  | CAG | 0.316320157 |                 | chr14      | 1      | 94544044  | 4          | FALSE     |
| CTGTCAGCACTGAGTATACA  | GGG | 0.303074972 |                 | chr13      | -1     | 23985245  | 4          | FALSE     |

Off-target for AAVS1 sgRNA

| Sequence             | PAM | Score       | Gene            | Chromosome | Strand | Position  | Mismatches | On-target |
|----------------------|-----|-------------|-----------------|------------|--------|-----------|------------|-----------|
| GGGGCCACTAGGGACAGGAT | TGG |             | 100             | chr19      | -1     | 55115755  | 0          | TRUE      |
| GGAGACATTAGGGACAGGAT | AAG | 2.548843537 |                 | chr10      | 1      | 119439186 | 3          | FALSE     |
| GAGGGCTCTAGGGACAGGAT | GAG | 1.765578231 |                 | chr9       | -1     | 90086414  | 3          | FALSE     |
| GGCCCCACTAGGGACAGGAC | GAG | 1.747668456 |                 | chr7       | 1      | 122844142 | 3          | FALSE     |
| GGGACCATCAGGGACAGGAT | GGG | 1.579455782 |                 | chr6       | 1      | 36797704  | 3          | FALSE     |
| CAGGGCACTGGGGACAGGAT | CAG | 1.45825     |                 | chr14      | 1      | 92970608  | 4          | FALSE     |
| GGGGCCAGTGGGGACAGGAG | CAG | 1.286963492 |                 | chr11      | 1      | 2127694   | 3          | FALSE     |
| GGGGCCAGTGGGGACAGGAA | GGG | 1.286963492 |                 | chr2       | -1     | 231959836 | 3          | FALSE     |
| GGGGCCAATTAGGACAGGAT | GGG | 1.240350575 |                 | chr13      | 1      | 105960580 | 3          | FALSE     |
| GGGGTCACTGGGGACAAGAT | TGG | 1.188203704 |                 | chr15      | -1     | 45535701  | 3          | FALSE     |
| TGGGCCACTATGGACAGGAA | TGG | 1.102071429 |                 | chr12      | -1     | 108187905 | 3          | FALSE     |
| GGGACCACTGGGCACAGGAT | CGG | 1.059798592 |                 | chr15      | -1     | 25222754  | 3          | FALSE     |
| GGGGATGCTAGGGACAGGAT | GAG | 0.972872986 |                 | chr2       | 1      | 204531421 | 3          | FALSE     |
| ACTGCCTCTAGGGACAGGAT | AGG | 0.971304808 |                 | chr15      | -1     | 36995662  | 4          | FALSE     |
| AGTGCCAACAGGGACAGGAT | GGG | 0.945468667 |                 | chr4       | 1      | 22172000  | 4          | FALSE     |
| TCGCCCACAGGGACAGGAT  | CAG | 0.934200644 | ENSG00000140983 | chr16      | -1     | 668379    | 4          | FALSE     |
| GTGTCCAAGAGGGACAGGAT | GGG | 0.92625     |                 | chr1       | -1     | 154829128 | 4          | FALSE     |
| GCAGCCAGGAGGGACAGGAT | GGG | 0.921121835 |                 | chr12      | 1      | 49891231  | 4          | FALSE     |
| GAGGGCAGCAGGGACAGGAT | GGG | 0.918433544 |                 | chr12      | 1      | 131827329 | 4          | FALSE     |
| GGCCCCAAGAGGGACAGGAT | GAG | 0.890545176 |                 | chr8       | 1      | 141604148 | 4          | FALSE     |
| GGTTCCAGCAGGGACAGGAT | CAG | 0.890545176 | ENSG00000113303 | chr5       | 1      | 180947683 | 4          | FALSE     |
| GGAGCCAGTAGGGAGAGGAT | AGG | 0.885487125 |                 | chr16      | 1      | 33884580  | 3          | FALSE     |
| GGAGCCAGTAGGGAGAGGAT | AGG | 0.885487125 |                 | chr16      | -1     | 32969375  | 3          | FALSE     |
| GTGGCCAGCTGGGACAGGAT | AGG | 0.85307625  |                 | chr9       | 1      | 34350240  | 4          | FALSE     |
| GGAGGGAGTAGGGACAGGAT | GAG | 0.839975543 |                 | chr11      | 1      | 113401727 | 4          | FALSE     |
| GGGGGAAGTAGTGACAGGAT | AGG | 0.823222707 |                 | chr20      | -1     | 43709929  | 3          | FALSE     |
| GAACCTACTAGGGACAGGAT | GAG | 0.820516651 |                 | chr6       | -1     | 157966901 | 4          | FALSE     |
| GAGGCCACAGGGACAGGCT  | GGG | 0.818083893 |                 | chr5       | -1     | 170084415 | 3          | FALSE     |
| GGGCACAGTAGGGACAGGAA | GAG | 0.811782787 |                 | chr8       | -1     | 17472023  | 4          | FALSE     |
| GAGGCCAGTGGGGACAGGAC | AGG | 0.790868822 |                 | chrX       | -1     | 150758233 | 4          | FALSE     |
| GGGGATATTGGGGACAGGAT | TGG | 0.79085371  |                 | chr4       | -1     | 47212824  | 4          | FALSE     |
| GGAGGCACTGGTGACAGGAT | GAG | 0.720218458 | ENSG00000223995 | chrX       | -1     | 128838711 | 4          | FALSE     |
| GGGGACAGTGGGGACAGGAG | GGG | 0.716336682 |                 | chr8       | -1     | 608459    | 4          | FALSE     |
| GGTGCCACTAGGCACAGGAG | CGG | 0.676347693 |                 | chr8       | 1      | 143802967 | 3          | FALSE     |
| GCGGCCAATGGGGACATGAT | GGG | 0.661366001 | ENSG00000063978 | chr4       | 1      | 2469079   | 4          | FALSE     |
| GAGGACAGTAGGGACAGGTT | AAG | 0.634004237 |                 | chr18      | 1      | 8749311   | 4          | FALSE     |
| CAGGCCCTAGGGACAGGAG  | CAG | 0.630210675 |                 | chr10      | 1      | 48519097  | 4          | FALSE     |
| GCAGCCCCAAGGGACAGGAT | GGG | 0.623771948 | ENSG00000166126 | chr14      | -1     | 102932045 | 4          | FALSE     |
| AGGGGCACTGGGGACAGGCT | TGG | 0.618883046 | ENSG00000126461 | chr19      | -1     | 49658572  | 4          | FALSE     |
| GCTGCCACTGGGTACAGGAT | CAG | 0.610728971 |                 | chr9       | -1     | 89227532  | 4          | FALSE     |
| AGGGCCCTTATGGACAGGAT | GGG | 0.605569086 | ENSG00000174951 | chr19      | -1     | 48749680  | 4          | FALSE     |
| TGGGCCAGTGGGGACAGGGT | GGG | 0.597418895 |                 | chr2       | -1     | 121052619 | 4          | FALSE     |
| GGGGCTTCTAAGGACAGGAT | GGG | 0.592837031 |                 | chr19      | -1     | 16064183  | 3          | FALSE     |
| GAGGGCCCTAGGGACAGGAG | AGG | 0.58649664  |                 | chr12      | -1     | 125092753 | 4          | FALSE     |
| GGTGGCTCTAGGGACAGGAA | GAG | 0.558901809 |                 | chr3       | 1      | 46366887  | 4          | FALSE     |
| GAGGCCGCTGGGGACAGGAC | GGG | 0.546481106 |                 | chr16      | -1     | 715574    | 4          | FALSE     |
| GGGCCCTATAGGGACAGGAA | AGG | 0.542587801 |                 | chr3       | -1     | 48569139  | 4          | FALSE     |
| GGTGCCACCAGGGAGAGGAT | GGG | 0.541032634 |                 | chr22      | -1     | 44303224  | 3          | FALSE     |
| GGAGCCACCAGGGAAAGGAT | GAG | 0.541032634 |                 | chr13      | -1     | 99628492  | 3          | FALSE     |
| ATGGCCACTAAGGACAGGAA | AGG | 0.538880515 |                 | chr12      | 1      | 107092504 | 4          | FALSE     |
