# Supplementary material for: Human iPSC modeling reveals mutation-specific responses to gene therapy in Best disease
Source: bioRxiv or medRxiv preprint supplement (doi:10.1101/796581), 2020-01-31
Supplement: Supplementary file [file media-4.pdf]

| BEST1 Mutation | Location | WT       | MT                                             | sgRNA candidates | Position | Strand                 | Sequence           | PAM  | Specificity Score | Efficiency Score | Comp eff at WT | ASE score | Position               | Guide                | Guide Strand           | Edited 5'->3' Sequence | Edit Scores           | Efficiency Score | scarless repair |
|----------------|----------|----------|------------------------------------------------|------------------|----------|------------------------|--------------------|------|-------------------|------------------|----------------|-----------|------------------------|----------------------|------------------------|------------------------|-----------------------|------------------|-----------------|
|                |          |          |                                                |                  | 61951902 | 1                      | AGCATcCAAGCTGCTATA | TGG  | 75.8              | 41.4             | 68.3           | 0.10      | 61951896               | ACTCGCCATATAGCAGCTTG | -1                     | CAAGCTGTATATAACAAAT    | 22.4, 13.4, 21.7, 2.5 | 77.5443088       | 0               |
| BEST1 Mutation | Location | WT       | MT                                             | sgRNA candidates | Position | Strand                 | Sequence           | PAM  | Specificity Score | Efficiency Score | Comp eff at WT | ASE score | Position               | Guide                | Guide Strand           | Edited 5'->3' Sequence | Edit Scores           | Efficiency Score | scarless repair |
| K30Arg         |          | 61951895 | TGCTGGCGGGGAGCAGCATACAAAGCTGCTATATGGCGAGTTCTTA | 61951891         | 1        | GCTGGCGGGGAGCAGCATCTAC | AgG                | 79.4 | 46.6              | 100              | 0.00           | 61951891  | GCTGGCGGGGAGCAGCATCTAC | 1                    | GTTGGTGGGGAGCAGCATCTAC | 0.4, 13.4              | 79.4233066            | 0                |                 |
|                |          |          |                                                | 61951902         | 1        | AGCATCTACAgGCTGCTATA   | TGG                | 74.4 | 41.4              | 55.5             | 0.14           | 61951902  | AGCATCTACAgGCTGCTATA   | 1                    | AGTATTACAgGCTGCTATA    | 0.5, 26.6              | 74.3911217            | 0                |                 |
| BEST1 Mutation | Location | WT       | MT                                             | sgRNA candidates | Position | Strand                 | Sequence           | PAM  | Specificity Score | Efficiency Score | Comp eff at WT | ASE score | Position               | Guide                | Guide Strand           | Edited 5'->3' Sequence | Edit Scores           | Efficiency Score | scarless repair |
| K30N           |          | 61951896 | GCTGGCGGGGAGCAGCATACAACTGCTATATGGCGAGTTCTTAA   | 61951902         | 1        | AGCATCTACAAcCTGCTATA   | TGG                | 75.2 | 40.7              | 49.2             | 0.16           | 61951902  | AGCATCTACAAcCTGCTATA   | 1                    | AGTATTACAAcCTGCTATA    | 0.5, 26.6              | 75.180543             | 0                |                 |
|                |          |          |                                                | 61951902         | -1       | TTAAGAACTCGCCATATAGC   | AgG                | 76.9 | 55.5              | 0                | 0.43           | 61951902  | TTAAGAACTCGCCATATAGC   | -1                   | GCTATAGGGGAATCTTAA     | 6.8                    | 76.9444828            | 0                |                 |
| BEST1 Mutation | Location | WT       | MT                                             | sgRNA candidates | Position | Strand                 | Sequence           | PAM  | Specificity Score | Efficiency Score | Comp eff at WT | ASE score | Position               | Guide                | Guide Strand           | Edited 5'->3' Sequence | Edit Scores           | Efficiency Score | scarless repair |
| L35K           |          | 61951909 | CATCTACAAGCTGCTATATGGCCAGTTCTTAATCTCTGCTCTG    | 0                | N/A      | N/A                    | N/A                | N/A  | N/A               | N/A              | N/A            | N/A       | N/A                    | N/A                  | N/A                    | N/A                    | N/A                   | N/A              | N/A             |
| BEST1 Mutation | Location | WT       | MT                                             | sgRNA candidates | Position | Strand                 | Sequence           | PAM  | Specificity Score | Efficiency Score | Comp eff at WT | ASE score | Position               | Guide                | Guide Strand           | Edited 5'->3' Sequence | Edit Scores           | Efficiency Score | scarless repair |
| L41P           |          | 61951928 | GCGGAGTTCTTAATCTCTGCTCTGCTACTACATCCGCTTT       | 61951929         | -1       | GGATGATGATAGTAGCAGG    | AGG                | 59.7 | 54.9              | 19.6             | 0.26           | 61951933  | AAGCGGATGATGATGATAGCA  | -1                   | TGCTACTACATCCACTTT     | 0.8                    | 78.6157351            | 0                |                 |
|                |          |          |                                                | 61951933         | -1       | AAGCGGATGATGATGATAGCA  | GgG                | 78.6 | 66.0              | 100              | 0.00           | 61951934  | AAAGCGGATGATGATGATAGC  | -1                   | GCTACTACATCCACTTT      | 4.6                    | 82.039877             | 0                |                 |
| BEST1 Mutation | Location | WT       | MT                                             | sgRNA candidates | Position | Strand                 | Sequence           | PAM  | Specificity Score | Efficiency Score | Comp eff at WT | ASE score | Position               | Guide                | Guide Strand           | Edited 5'->3' Sequence | Edit Scores           | Efficiency Score | scarless repair |
| Q58Leu         |          | 61955127 | aGGCTGGCCCTCACGGAAGAACACAGCTGATGTTGAGAACTG     | 61955118         | -1       | CAGCTGATGTTCTCCGTGA    | GGG                | 85.6 | 67.1              | 100              | 0.00           | 61955118  | CAGCTGATGTTCTCCGTGA    | -1                   | TCACGGAAGAACACAACTA    | 0.8, 4.1               | 85.6357741            | 0                |                 |
|                |          |          |                                                | 61955119         | -1       | TCAGCTGATGTTCTCCGTG    | AGG                | 81.6 | 69.8              | 61.1             | 0.22           | 61955119  | TCAGCTGATGTTCTCCGTG    | -1                   | CACGGAAGAACACAACTA     | 4.6, 6.4               | 81.6166894            | 0                |                 |
| BEST1 Mutation | Location | WT       | MT                                             | sgRNA candidates | Position | Strand                 | Sequence           | PAM  | Specificity Score | Efficiency Score | Comp eff at WT | ASE score | Position               | Guide                | Guide Strand           | Edited 5'->3' Sequence | Edit Scores           | Efficiency Score | scarless repair |
| T91I           |          | 61955742 | TTCTACGTGACGCTGGTGCACCGCTGGTGAACAGTACGAG       | 61955744         | 1        | TGACGCTGGTCTGTAACCGC   | TGG                | 93.7 | 53.3              | 17.2             | 0.41           | 61955744  | TGACGCTGGTCTGTAACCGC   | 1                    | TGATGTTGCTGTAACCGC     | 11.6, 13.4             | 93.665206             | 0                |                 |
|                |          |          |                                                | 61955747         | 1        | CGCTGGTCTGTAACCGCTGG   | TGG                | 91.3 | 54.5              | 38.7             | 0.31           | 61955747  | CGCTGGTCTGTAACCGCTGG   | 1                    | TGTTGTTGTAACCGCTGG     | 0.8, 0.5, 25.4         | 91.3186015            | 0                |                 |
| BEST1 Mutation | Location | WT       | MT                                             | sgRNA candidates | Position | Strand                 | Sequence           | PAM  | Specificity Score | Efficiency Score | Comp eff at WT | ASE score | Position               | Guide                | Guide Strand           | Edited 5'->3' Sequence | Edit Scores           | Efficiency Score | scarless repair |
| R92G           |          | 61955744 | CTACGTGACGCTGGTGCACCGCTGGTGAACAGTACGAGAA       | 61955740         | 1        | TACGTGACGCTGGTGCAGC    | CgG                | 95.3 | 56.5              | 0                | 0.54           | 61955740  | TACGTGACGCTGGTGCAGC    | 1                    | TATGTGATGCTGGTGCAGC    | 5.6, 6.8               | 95.2968945            | 0                |                 |
|                |          |          |                                                | 61955744         | 1        | TGACGCTGGTCTGTAACCGC   | TGG                | 90.1 | 53.1              | 19.6             | 0.38           | 61955744  | TGACGCTGGTCTGTAACCGC   | 1                    | TGATGTTGCTGTAACCGC     | 11.6, 13.4             | 90.0697165            | 0                |                 |
|                |          |          |                                                | 61955747         | 1        | CGCTGGTCTGTAACCGCTGG   | TGG                | 85.2 | 52.7              | 26.8             | 0.33           | 61955747  | CGCTGGTCTGTAACCGCTGG   | 1                    | TGTTGTTGTAACCGCTGG     | 0.8, 0.5, 25.4         | 85.1688349            | 0                |                 |
|                |          |          |                                                | 61955748         | -1       | CTCGTACTGTTCCACCAGC    | cGG                | 75.2 | 55.3              | 100              | 0.00           | 61955748  | CTCGTACTGTTCCACCAGC    | -1                   | GCTGGTGAACCAATACAAA    | 19.0, 16.0, 4.1        | 75.1890487            | 0                |                 |
| BEST1 Mutation | Location | WT       | MT                                             | sgRNA candidates | Position | Strand                 | Sequence           | PAM  | Specificity Score | Efficiency Score | Comp eff at WT | ASE score | Position               | Guide                | Guide Strand           | Edited 5'->3' Sequence | Edit Scores           | Efficiency Score | scarless repair |
| R92C           |          | 61955744 | CTACGTGACGCTGGTGCACCGCTGGTGAACAGTACGAGAA       | 61955744         | 1        | TGACGCTGGTCTGTAACCGC   | TGG                | 81.2 | 54.2              | 19.6             | 0.35           | 61955744  | TGACGCTGGTCTGTAACCGC   | 1                    | TGATGTTGCTGTAACCGC     | 11.6, 13.4             | 81.1858422            | 0                |                 |
|                |          |          |                                                | 61955747         | 1        | CGCTGGTCTGTAACCGCTGG   | TGG                | 71.1 | 53.7              | 26.8             | 0.28           | 61955747  | CGCTGGTCTGTAACCGCTGG   | 1                    | TGTTGTTGTAACCGCTGG     | 0.8, 0.5, 25.4         | 71.0970537            | 0                |                 |
|                |          |          |                                                | 61955748         | -1       | CTCGTACTGTTCCACCAGC    | aGG                | 75.2 | 53.5              | 100              | 0.00           | 61955748  | CTCGTACTGTTCCACCAGC    | -1                   | GCTGGTGAACCAATACAAA    | 19.0, 16.0, 4.1        | 75.1890487            | 0                |                 |
| BEST1 Mutation | Location | WT       | MT                                             | sgRNA candidates | Position | Strand                 | Sequence           | PAM  | Specificity Score | Efficiency Score | Comp eff at WT | ASE score | Position               | Guide                | Guide Strand           | Edited 5'->3' Sequence | Edit Scores           | Efficiency Score | scarless repair |
| R92S           |          | 61955744 | CTACGTGACGCTGGTGCACCGCTGGTGAACAGTACGAGAA       | 61955744         | 1        | TGACGCTGGTCTGTAACCGC   | TGG                | 79.5 | 54.7              | 19.6             | 0.35           | 61955744  | TGACGCTGGTCTGTAACCGC   | 1                    | TGATGTTGCTGTAACCGC     | 11.6, 13.4             | 79.4690404            | 0                |                 |
|                |          |          |                                                | 61955747         | 1        | CGCTGGTCTGTAACCGCTGG   | TGG                | 75.5 | 56.2              | 26.8             | 0.31           | 61955747  | CGCTGGTCTGTAACCGCTGG   | 1                    | TGTTGTTGTAACCGCTGG     | 0.8, 0.5, 25.4         | 75.495335             | 0                |                 |
|                |          |          |                                                | 61955748         | -1       | CTCGTACTGTTCCACCAGC    | tGG                | 75.2 | 47.5              | 100              | 0.00           | 61955748  | CTCGTACTGTTCCACCAGC    | -1                   | GCTGGTGAACCAATACAAA    | 19.0, 16.0, 4.1        | 75.1890487            | 0                |                 |
| BEST1 Mutation | Location | WT       | MT                                             | sgRNA candidates | Position | Strand                 | Sequence           | PAM  | Specificity Score | Efficiency Score | Comp eff at WT | ASE score | Position               | Guide                | Guide Strand           | Edited 5'->3' Sequence | Edit Scores           | Efficiency Score | scarless repair |
| R92H           |          | 61955745 | TACGTGACGCTGGTGCACCGCTGGTGAACAGTACGAGAA        | 61955744         | 1        | TGACGCTGGTCTGTAACCGC   | TGG                | 87.8 | 55.0              | 31.5             | 0.33           | 61955744  | TGACGCTGGTCTGTAACCGC   | 1                    | TGATGTTGCTGTAACCGC     | 11.6, 13.4             | 87.8034991            | 0                |                 |
|                |          |          |                                                | 61955747         | 1        | CGCTGGTCTGTAACCGCTGG   | TGG                | 78.3 | 57.9              | 17.2             | 0.38           | 61955747  | CGCTGGTCTGTAACCGCTGG   | 1                    | TGTTGTTGTAACCGCTGG     | 0.8, 0.5, 25.4         | 78.2885309            | 0                |                 |
|                |          |          |                                                | 61955748         | -1       | CTCGTACTGTTCCACCAGt    | GGG                | 82.7 | 58.4              | 41.7             | 0.28           | 61955748  | CTCGTACTGTTCCACCAGt    | -1                   | aCTGGTGAACCAATACAAA    | 19.0, 16.0, 4.1        | 82.693454             | 0                |                 |
|                |          |          |                                                | 61955749         | -1       | TCTGTACTGTTCCACCAG     | tGG                | 76.3 | 63.5              | 100              | 0.00           | 61955749  | TCTGTACTGTTCCACCAG     | -1                   | CTGGTGAACCAATACAAA     | 6.8, 21.7, 6.4         | 76.2936189            | 0                |                 |
